# Supplementary material
Source: publisher site journal article supplement (https://www.spandidos-publications.com/7852/downloadSupplementary)
Supplement: Supplementary file 1 [file downloadSupplementary]

## Sheet: Sheet 1
Table SII. Data summary of TCGA-LUAD cohort (n=585).
submitter_id.samples	additional_pharmaceutical_therapy	additional_radiation_therapy	additional_surgery_locoregional_procedure	additional_surgery_metastatic_procedure	age_at_initial_pathologic_diagnosis	anatomic_neoplasm_subdivision_other	batch_number	bcr	bcr_followup_barcode	bcr_followup_uuid	submitter_id	day_of_dcc_upload	day_of_form_completion	days_to_additional_surgery_locoregional_procedure	days_to_additional_surgery_metastatic_procedure	days_to_initial_pathologic_diagnosis	days_to_new_tumor_event_after_initial_treatment	diagnosis	dlco_predictive_percent	eastern_cancer_oncology_group	egfr_mutation_performed	egfr_mutation_result	eml4_alk_translocation_method	eml4_alk_translocation_performed	file_uuid	followup_case_report_form_submission_reason	followup_treatment_success	history_of_neoadjuvant_treatment	informed_consent_verified	karnofsky_performance_score	kras_gene_analysis_performed	kras_mutation_found	kras_mutation_result	location_in_lung_parenchyma	lost_follow_up	month_of_dcc_upload	month_of_form_completion	new_tumor_event_after_initial_treatment	number_pack_years_smoked	other_dx	pathologic_M	pathologic_N	pathologic_T	patient_id	performance_status_scale_timing	person_neoplasm_cancer_status	post_bronchodilator_fev1_fvc_percent	post_bronchodilator_fev1_percent	postoperative_rx_tx
TCGA-55-6982-11A	YES	YES	NO	YES	79		160.69.0	Nationwide Children's Hospital	TCGA-55-6982-F46626	482B5DF1-D91C-483A-ACE3-C2C65F5FA3DD	TCGA-55-6982	22	13		183	0	183	Lung Adenocarcinoma			NO			NO	772514A4-BB8E-48F2-A67D-F86912400321	Scheduled Follow-up Submission	Progressive Disease	No	YES		NO				NO	12	8	YES		No	M0	N1	T2	6982		WITH TUMOR			NO
TCGA-44-3396-11A					74		58.77.0	Nationwide Children's Hospital	TCGA-44-3396-F5016	5e3024c8-c8ce-42c6-bfec-8fbe87e3146a	TCGA-44-3396	22	22			0		Lung Adenocarcinoma	48	1					4B51A33D-6C3B-4DAD-8509-7E8E0FF89DA2		Complete Remission/Response	No	YES		NO					12	10	NO	50	No	M0	N2	T2	3396	Adjuvant therapy	TUMOR FREE			YES
TCGA-44-2657-11A					74		52.74.0	Nationwide Children's Hospital	TCGA-44-2657-F5295	c8b44a22-7cab-4d8d-a222-c557b242790d	TCGA-44-2657	22	8			0		Lung Adenocarcinoma	96	0					D7B9064E-AF2B-4146-927B-B60B3DA894FD		Complete Remission/Response	No	YES		NO					12	10	NO	25	No	M0	NX	T2	2657	Pre-Adjuvant Therapy	TUMOR FREE	87	147	NO
TCGA-44-6777-11A					85		144.70.0	Nationwide Children's Hospital	TCGA-44-6777-F15694	d62760e3-307f-4aad-a7b8-1ab9f020e3f7	TCGA-44-6777	22	30			0		Lung Adenocarcinoma	178	3					2DB9C960-F21D-4A59-850D-19E21F5F3EC4	Scheduled Follow-up Submission		No	YES							12	8	NO	64	No	MX	NX	T2	6777	Post-Adjuvant Therapy	TUMOR FREE	77	71	NO
TCGA-73-4676-11A					45		119.76.0	Nationwide Children's Hospital	TCGA-73-4676-F12553	f8c9076a-23b2-4792-bcbc-c88d250d1ff3	TCGA-73-4676	22	18			0		Lung Adenocarcinoma	86	0	NO			NO	BC836CC8-588C-40CD-BC42-76D29F900F72			Yes	YES	90	NO			Peripheral Lung		12	5	NO	48	No	M0	N1	T2a	4676	Adjuvant therapy				YES
TCGA-55-6971-11A					59		160.69.0	Nationwide Children's Hospital	TCGA-55-6971-F56190	12A8DE46-0514-47CB-A544-77296F337007	TCGA-55-6971	22	29			0		Lung Adenocarcinoma			NO			NO	EE5118B4-197B-4A44-A1AF-EDB3D22441E7	Scheduled Follow-up Submission	Complete Remission/Response	No	YES		NO				NO	12	1	NO	60	No	MX	N0	T2	6971		TUMOR FREE			NO
TCGA-38-4632-11A	YES	NO	NO	NO	42		119.76.0	Nationwide Children's Hospital	TCGA-38-4632-F4839	ecb636f6-dc7d-48c5-9a00-02aec73f03b1	TCGA-38-4632	22	13			0	680	Lung Adenocarcinoma			NO			NO	4E0B9642-1D15-4D8E-80EA-CA0A727815F0		Stable Disease	No	YES		NO			Peripheral Lung		12	12	YES	10	No	M1	N1	T2	4632		WITH TUMOR			NO
TCGA-55-6975-11A					61		160.69.0	Nationwide Children's Hospital	TCGA-55-6975-F45635	2CC60EBB-2FF5-41FE-8FCF-9C419EDDE7D9	TCGA-55-6975	22	17			0		Lung Adenocarcinoma			NO			NO	58F6DDDC-393F-4CE1-84E4-9DA898392D1E	Scheduled Follow-up Submission	Progressive Disease	No	YES		NO				NO	12	7	NO		No	M0	N1	T2	6975		WITH TUMOR			NO
TCGA-55-6981-11A					53		160.69.0	Nationwide Children's Hospital	TCGA-55-6981-F56243	1E30CFED-13C2-4A05-B32F-1A96D4DE789B	TCGA-55-6981	22	30			0		Lung Adenocarcinoma			NO			NO	302CD38E-B25E-4BC0-A75F-A97D786A7965	Scheduled Follow-up Submission	Complete Remission/Response	No	YES		NO				NO	12	1	NO		No	M0	N2	T1	6981		TUMOR FREE			YES
TCGA-49-4512-11A					69		144.70.0	Nationwide Children's Hospital	TCGA-49-4512-F14815	5d052835-b26a-42e0-aa2d-fb53c06891f4	TCGA-49-4512	22	10			0		Lung Adenocarcinoma							176EFBB6-D0E9-44CB-9364-0E7427AB046B	Scheduled Follow-up Submission		No	YES							12	8	NO		No	MX	N2	T2	4512		WITH TUMOR			YES
TCGA-44-6776-11A					60		144.70.0	Nationwide Children's Hospital	TCGA-44-6776-F15756	452c565f-f54c-4dcb-b781-4c6940df5e67	TCGA-44-6776	22	31			0		Lung Adenocarcinoma	80						47D97B9D-EE24-466A-80FE-2DCF52A53F1C	Scheduled Follow-up Submission	Complete Remission/Response	No	YES							12	8	NO	45	Yes	MX	N0	T1	6776		TUMOR FREE	85	82	NO
TCGA-91-6828-11A					70		144.70.0	Nationwide Children's Hospital	TCGA-91-6828-F21014	182ca854-9147-4d4e-b2aa-7b899e591214	TCGA-91-6828	22	8			0		Lung Adenocarcinoma	71	2					0DF61DC9-E38C-4780-85E3-961A2C33C556	Scheduled Follow-up Submission		No	YES		NO					12	5	NO		No	M0	N0	T1a	6828	Preoperative	TUMOR FREE			NO
TCGA-55-6986-11A					74		160.69.0	Nationwide Children's Hospital	TCGA-55-6986-F45606	D147F3D1-27F0-467E-9212-AE14BCF08700	TCGA-55-6986	22	17			0		Lung Adenocarcinoma			NO			NO	C4ABA8E0-DBA8-4889-873E-83C519EA6240	Scheduled Follow-up Submission	Complete Remission/Response	No	YES		NO				NO	12	7	NO		No	M0	N0	T2	6986		TUMOR FREE			NO
TCGA-91-6831-11A					66		144.70.0	Nationwide Children's Hospital	TCGA-91-6831-F32636	05ae61a2-c054-4273-b50c-4760cbb08a73	TCGA-91-6831	22	5			0		Lung Adenocarcinoma							B9F32319-9014-468C-B139-FEB526351B29	Scheduled Follow-up Submission	Complete Remission/Response	No	YES		NO				YES	12	6	NO		No	MX	N0	T2	6831		TUMOR FREE			NO
TCGA-44-6148-11A					60		119.76.0	Nationwide Children's Hospital	TCGA-44-6148-F20979	0588d138-a508-4c15-80e2-1703a91ce323	TCGA-44-6148	22	25			0		Lung Adenocarcinoma							AC688301-57A6-4898-AE88-30EA1B632E3D	Scheduled Follow-up Submission	Complete Remission/Response	No	YES		NO	NO				12	1	NO	60	No	M0	N0	T1b	6148		TUMOR FREE	110	77	NO
TCGA-44-2655-11A	NO	NO	NO	NO	65		37.77.0	Nationwide Children's Hospital	TCGA-44-2655-F5293	42f22d9e-2d8f-4b1f-81e7-29eca0f4fed2	TCGA-44-2655	22	8			0		Lung Adenocarcinoma	73						C8651EDC-3160-414E-993D-FC0C112E708E		Complete Remission/Response	No	YES		NO					12	10	NO	30	Yes	M0	N0	T1	2655		TUMOR FREE			NO
TCGA-50-5933-11A					72		119.76.0	Nationwide Children's Hospital	TCGA-50-5933-F32104	ceeea662-3e16-4daf-bcf0-50f8d50e75ea	TCGA-50-5933	22	17			0		Lung Adenocarcinoma							7419B949-44DB-476E-9C1B-9FAF9E058D9B	Scheduled Follow-up Submission	Complete Remission/Response	No	YES					Central Lung	NO	12	5	NO		No	M0	N2	T4	5933		TUMOR FREE			YES
TCGA-55-6970-11A	NO	NO	NO		67		160.69.0	Nationwide Children's Hospital	TCGA-55-6970-F57904	CBF3A7D1-584C-4CCD-B4DE-B8AB2DABFD79	TCGA-55-6970	22	28			0	457	Lung Adenocarcinoma			NO			NO	85CBF41C-C92A-49CE-8209-F6D1A682227E	Scheduled Follow-up Submission	Progressive Disease	No	YES		NO				NO	12	3	YES		No	MX	N2	T2	6970		WITH TUMOR			YES
TCGA-55-6983-11A					81		160.69.0	Nationwide Children's Hospital	TCGA-55-6983-F47805	1E012012-FC2E-4B87-A8A8-30017E10F92D	TCGA-55-6983	22	28			0		Lung Adenocarcinoma			NO			NO	5E2B5428-5A25-41F1-BBE5-534D444494CE	Scheduled Follow-up Submission	Complete Remission/Response	No	YES		NO				NO	12	8	NO	60	No	M0	N1	T2	6983		TUMOR FREE			YES
TCGA-50-6595-11A	NO	NO	NO	YES	74		144.70.0	Nationwide Children's Hospital	TCGA-50-6595-F44127	AEA27241-AF39-4C5C-ADA3-91E25F21073D	TCGA-50-6595	22	13		187	0	182	Lung Adenocarcinoma			YES			YES	FB4A64E3-16BF-42B7-A9B4-638582A6929C	Scheduled Follow-up Submission	Progressive Disease	No	YES		YES				NO	12	6	YES		No	M0	N2	T2	6595		WITH TUMOR			YES
TCGA-91-6836-11A					52		144.70.0	Nationwide Children's Hospital	TCGA-91-6836-F32646	5fc630d3-b549-4447-ba28-c379c0b08fa4	TCGA-91-6836	22	5			0		Lung Adenocarcinoma	97		NO				EF6E265D-5B54-4006-B126-D1C4FEBF3547	Scheduled Follow-up Submission	Complete Remission/Response	No	YES		NO				NO	12	6	NO	50	Yes	MX	N0	T2	6836		TUMOR FREE	101	109	NO
TCGA-50-5932-11A	YES	NO	NO	NO	75		119.76.0	Nationwide Children's Hospital	TCGA-50-5932-F32080	aa578f39-0f94-41df-ad90-1a68f7a7fb43	TCGA-50-5932	22	16			0	1090	Lung Adenocarcinoma							AEF9852A-66A8-4E40-BC67-EE69CE1CD8D7	Scheduled Follow-up Submission	Progressive Disease	No	YES					Central Lung	NO	12	5	YES		Yes	M0	N1	T2	5932		WITH TUMOR			NO
TCGA-55-6979-11A	YES	YES		NO	59		160.69.0	Nationwide Children's Hospital	TCGA-55-6979-F37057	7DAF16E2-34A6-40ED-99FB-8C3F3205DA98	TCGA-55-6979	22	22			0	195	Lung Adenocarcinoma			NO			NO	CDAF86CA-D631-442F-866A-79078311E8D8	Scheduled Follow-up Submission	Progressive Disease	No	YES		NO				NO	12	2	YES		Yes	M0	N1	T2	6979		WITH TUMOR			YES
TCGA-44-2665-11A					55		37.77.0	Nationwide Children's Hospital	TCGA-44-2665-F5298	9ee191ec-e1cb-48f8-a661-441671526c98	TCGA-44-2665	22	13			0		Lung Adenocarcinoma	71	0					050BDC49-DBE1-4EFC-A20E-234C1B9DD8EA		Stable Disease	No	YES		NO					12	10	NO		No	M0	N1	T2	2665	Post-Adjuvant Therapy	TUMOR FREE	79	105	YES
TCGA-38-4626-11A					57		58.77.0	Nationwide Children's Hospital	TCGA-38-4626-F4507	f7d53f3d-25b9-43f5-9d12-f4c38dd72816	TCGA-38-4626	22	8			0		Lung Adenocarcinoma	57						DEA2C380-67B8-4CE6-9530-CF116C12859B			No	YES					Central Lung		12	12	NO	40	No	M0	N0	T2b	4626		TUMOR FREE	68	85	NO
TCGA-91-6847-11A	NO	YES		NO	62		160.69.0	Nationwide Children's Hospital	TCGA-91-6847-F32637	FB5F10C7-9572-4BC0-B5F4-245D88F78D07	TCGA-91-6847	22	5			0	772	Lung Adenocarcinoma							E8D3185C-CEED-43CB-8DE4-98C562627166	Scheduled Follow-up Submission	Stable Disease	No	YES		NO				YES	12	6	YES		No	MX	N0	T2	6847		WITH TUMOR			NO
TCGA-55-6980-11A					56		160.69.0	Nationwide Children's Hospital	TCGA-55-6980-F46642	280D1471-7D87-47DB-AAD2-6281B990E361	TCGA-55-6980	22	13			0		Lung Adenocarcinoma			NO			NO	23281AEF-3BED-4805-8A53-6555A56305D1	Scheduled Follow-up Submission	Complete Remission/Response	No	YES		NO				NO	12	8	NO		No	M0	N0	T1	6980		TUMOR FREE			NO
TCGA-50-5931-11A	NO	NO		NO	75		119.76.0	Nationwide Children's Hospital	TCGA-50-5931-F32067	6abc6f4d-700c-429a-8a96-cab76c1bd8ae	TCGA-50-5931	22	16			0	425	Lung Adenocarcinoma							59DE6F3A-0FEA-4AF6-BC20-88B37C3DCF6C	Scheduled Follow-up Submission	Progressive Disease	No	YES					Central Lung	NO	12	5	YES	40	No	M0	N0	T2	5931		WITH TUMOR			NO
TCGA-91-6829-11A					78		144.70.0	Nationwide Children's Hospital	TCGA-91-6829-F32591	3d7c1967-95c7-4bfe-ac6c-b8e1de1816c8	TCGA-91-6829	22	4			0		Lung Adenocarcinoma							F89FCF7E-8612-409C-AC98-3DC821F1F60E	Scheduled Follow-up Submission	Progressive Disease	No	YES	0	NO				NO	12	6	NO	94.5	No	MX	N0	T2	6829					NO
TCGA-50-5936-11A	YES	NO	YES	NO	58		84.73.0	Nationwide Children's Hospital	TCGA-50-5936-F32110	a515c2f5-9d6e-4d08-a136-8480b38b7e6b	TCGA-50-5936	22	17	177		0	150	Lung Adenocarcinoma			YES				861B680E-3E8B-4945-9A0C-CF0973023166	Scheduled Follow-up Submission	Progressive Disease	No	YES		YES	YES	G12C		NO	12	5	YES		No	M0	N2	T2	5936		WITH TUMOR			NO
TCGA-55-6984-11A	YES	NO	NO	NO	71		160.69.0	Nationwide Children's Hospital	TCGA-55-6984-F45632	DB66DE4C-0099-4F8A-8ABA-4D7D43922A68	TCGA-55-6984	22	17			0	724	Lung Adenocarcinoma			NO			NO	B95E05C5-F4AC-44BB-9169-EF120FB5D809	Scheduled Follow-up Submission	Progressive Disease	No	YES		NO				NO	12	7	YES		No	M0	N1	T2	6984		WITH TUMOR			YES
TCGA-55-6968-11A					61		160.69.0	Nationwide Children's Hospital	TCGA-55-6968-F56247	78B86F68-8C53-4B9F-8321-02FDEB8CB702	TCGA-55-6968	22	30			0		Lung Adenocarcinoma							762148F9-3D2D-4EAA-8874-FEEB61260B78	Scheduled Follow-up Submission	Stable Disease	No	YES						NO	12	1	NO		No	M1	N0	T1	6968		WITH TUMOR			YES
TCGA-38-4627-11A					64		58.77.0	Nationwide Children's Hospital	TCGA-38-4627-F4508	f15fda3c-b93a-4ae2-95d3-c372aed5ea42	TCGA-38-4627	22	8			0		Lung Adenocarcinoma							CAFCCC9C-E90A-4ECE-B000-AC81582E14D0			No	YES					Central Lung		12	12			No	M0	N1	T1b	4627					NO
TCGA-44-2662-11A	YES	YES	NO	NO	65		37.77.0	Nationwide Children's Hospital	TCGA-44-2662-F5032	b2f9a164-783a-4a61-ba4e-eab35f83bab7	TCGA-44-2662	22	21			0	245	Lung Adenocarcinoma	78	1					C1468F84-B125-4A52-8742-7FE8A481C6D0		Partial Remission/Response	No	YES		NO					12	10	YES	56	Yes	M0	N0	T2	2662	Post-Adjuvant Therapy		94	73	YES
TCGA-49-6744-11A					64		144.70.0	Nationwide Children's Hospital	TCGA-49-6744-F14923	1841d2d6-26a6-417f-b575-0af2e3d8ca1a	TCGA-49-6744	22	10			0		Lung Adenocarcinoma							E4849CD1-90BC-4C26-9D2F-1B2F71546391		Complete Remission/Response	No	YES		YES	YES				12	8	NO	20	No	MX	N1	T2a	6744		TUMOR FREE			YES
TCGA-44-2668-11A					51		37.77.0	Nationwide Children's Hospital	TCGA-44-2668-F5041	5510cceb-3418-48f7-870a-01d65ebd2f55	TCGA-44-2668	22	22			0		Lung Adenocarcinoma	53	0					FAC2D7F9-34E4-4B2C-8989-20CE1ABD14BE		Complete Remission/Response	No	YES		NO					12	10	NO	60	No	M0	N0	T2	2668		TUMOR FREE			NO
TCGA-55-6978-11A	NO	YES	NO	NO	81		160.69.0	Nationwide Children's Hospital	TCGA-55-6978-F45607	503F8882-F797-4D4A-86CC-4FD93814BA3C	TCGA-55-6978	22	17			0	42	Lung Adenocarcinoma			NO			NO	6B6E7911-D891-4B20-A493-BEE47DECD298	Scheduled Follow-up Submission	Progressive Disease	No	YES		NO				NO	12	7	YES		Yes	MX	N0	T2b	6978		WITH TUMOR			NO
TCGA-44-6146-11A					64		119.76.0	Nationwide Children's Hospital	TCGA-44-6146-F12758	37ef67dc-0389-44bd-9265-02d220a94c2f	TCGA-44-6146	22	7			0		Lung Adenocarcinoma	76	1					5453F22B-5C02-49EF-A3F0-0D74CA595134			No	YES							12	6		15	Yes	M0	N0	T3	6146	Adjuvant therapy	TUMOR FREE	95	94	YES
TCGA-44-3398-11B					77		52.74.0	Nationwide Children's Hospital	TCGA-44-3398-F5292	b338b0a9-78f2-44d5-a19c-5beca343abd0	TCGA-44-3398	22	11			0		Lung Adenocarcinoma	60						F064A38F-C337-4479-952C-64FCB4A1884A		Complete Remission/Response	No	YES		NO					12	10	NO	60	No	M0	N0	T1b	3398		TUMOR FREE	89	96	NO
TCGA-49-6742-11A	YES	NO	NO	YES	70		144.70.0	Nationwide Children's Hospital	TCGA-49-6742-F14741	e6565afe-c87f-4fa9-94e1-29b1e25d0ab8	TCGA-49-6742	22	9		214	0	214	Lung Adenocarcinoma							AE3149D1-0E57-464F-8853-291C4FC31DA0	Scheduled Follow-up Submission		No	YES		YES	NO				12	8	YES	10	Yes	M0	N1	T2a	6742		WITH TUMOR			YES
TCGA-49-6745-11A					82		144.70.0	Nationwide Children's Hospital	TCGA-49-6745-F15015	47cc0678-9e26-4402-8fcf-1e549c6cf16d	TCGA-49-6745	22	11			0		Lung Adenocarcinoma			YES				48CC69C5-7F68-4E7E-83CF-E4748AE5A2B4	Scheduled Follow-up Submission		No	YES		YES	NO				12	8	NO	20	Yes	M0	N2	T2a	6745		TUMOR FREE			YES
TCGA-49-6743-11A					81		144.70.0	Nationwide Children's Hospital	TCGA-49-6743-F14858	cd1e65ca-466c-495d-b733-aac17946d06a	TCGA-49-6743	22	10			0		Lung Adenocarcinoma							8847A037-7E03-4BCE-AC12-18313BF328C3	Scheduled Follow-up Submission	Complete Remission/Response	No	YES							12	8	NO	50	No	MX	N2	T1	6743		TUMOR FREE			YES
TCGA-38-4625-11A					66		58.77.0	Nationwide Children's Hospital	TCGA-38-4625-F4505	3ba4cc67-5bc8-4ad5-a486-601d63f9f7c7	TCGA-38-4625	22	8			0		Lung Adenocarcinoma	68		NO			NO	E3CCF5BA-823F-445A-BF53-1AD1B43CE5D5			No	YES		NO			Peripheral Lung		12	12		50	No	M0	N0	T2a	4625			66	66	NO
TCGA-49-4490-11A					45		144.70.0	Nationwide Children's Hospital	TCGA-49-4490-F14703	b7af674f-dfd7-41ca-b313-fbe7cf636256	TCGA-49-4490	22	9			0		Lung Adenocarcinoma							AD4A3A4C-AA14-45A5-A202-183C9A94D6CE	Scheduled Follow-up Submission		No	YES							12	8	NO	5	No	M0	N2	T3	4490		WITH TUMOR			YES
TCGA-44-5645-11A					61		84.73.0	Nationwide Children's Hospital	TCGA-44-5645-F14601	9d996467-3fd5-408f-9225-258a86d0bd01	TCGA-44-5645	22	4			0		Lung Adenocarcinoma	82						37B44453-A0B4-4C66-9788-87B220791381	Scheduled Follow-up Submission	Complete Remission/Response	No	YES							12	8	NO	5	No		NX	T1	5645		TUMOR FREE			NO
TCGA-50-5935-11A			NO		86		119.76.0	Nationwide Children's Hospital	TCGA-50-5935-F32108	1e2da076-3f69-4de4-af22-9f3dfc1ce1f3	TCGA-50-5935	22	17			0		Lung Adenocarcinoma			YES	Other			F7B464CF-ABEA-4DBB-A5AD-380589EDC2DB	Scheduled Follow-up Submission	Complete Remission/Response	No	YES		YES	YES			NO	12	5	NO		Yes	M0	N0	T1	5935		TUMOR FREE			NO
TCGA-50-5939-11A					85		84.73.0	Nationwide Children's Hospital	TCGA-50-5939-F32124	2105f694-4ccf-4c6e-8eba-917a55c789e3	TCGA-50-5939	22	17			0		Lung Adenocarcinoma							D9175EB1-505B-4EBB-BE91-5E38D5A090CE	Scheduled Follow-up Submission	Complete Remission/Response	No	YES							12	5	NO	15	No	M0	N0	T2	5939		TUMOR FREE			NO
TCGA-49-6761-11A	NO	NO			68		160.69.0	Nationwide Children's Hospital	TCGA-49-6761-F22056	8ad6b3d6-48a1-4f9e-8ea6-cf0d7394cdf6	TCGA-49-6761	22	23			0		Lung Adenocarcinoma	1						E0A39A36-9287-4180-8C7E-5DD423122A19	Scheduled Follow-up Submission		No	YES							12	2	NO	50	Yes	MX	N2	T1	6761			64	56	NO
TCGA-55-6969-11A					52		160.69.0	Nationwide Children's Hospital			TCGA-55-6969	22				0		Lung Adenocarcinoma			NO			NO	ACDFB3D6-D898-41EF-B295-156F7C9A16D8			No	YES		NO					12				No	M0	N0	T2	6969
TCGA-44-6145-11A					62		119.76.0	Nationwide Children's Hospital	TCGA-44-6145-F28687	32fc1b78-c824-434f-b655-22498b49fb64	TCGA-44-6145	22	28			0		Lung Adenocarcinoma	73						6886D83E-7610-4C53-BF86-F29B4791438D	Scheduled Follow-up Submission	Complete Remission/Response	No	YES		NO	NO				12	2	NO	75	No	M0	N0	T1	6145		TUMOR FREE	91	90	NO
TCGA-91-6835-11A					81		144.70.0	Nationwide Children's Hospital	TCGA-91-6835-F32643	169e8cda-2406-4085-97e2-7287e1bd2e41	TCGA-91-6835	22	5			0		Lung Adenocarcinoma	78		NO				D9F21111-AE9A-4546-935A-85C411F646B2	Scheduled Follow-up Submission	Complete Remission/Response	No	YES		NO				YES	12	6	NO	25	No	M0	N0	T1	6835		TUMOR FREE		91	NO
TCGA-55-6972-11A					72		160.69.0	Nationwide Children's Hospital	TCGA-55-6972-F56187	6284B038-E7CE-476E-881E-8376A9D912BD	TCGA-55-6972	22	29			0		Lung Adenocarcinoma			NO			NO	361D2B08-FF14-4FB8-BBBF-EDEDC229FE4F	Scheduled Follow-up Submission	Complete Remission/Response	No	YES		NO				NO	12	1	NO		No	M0	N0	T2	6972		TUMOR FREE			NO
TCGA-44-6778-11A					59		144.70.0	Nationwide Children's Hospital	TCGA-44-6778-F15765	cdcf76b6-e93b-4d22-8d67-6a137b04617f	TCGA-44-6778	22	31			0		Lung Adenocarcinoma	53						51BED102-E3B7-488C-BF16-074F13BC9AF7	Scheduled Follow-up Submission	Complete Remission/Response	No	YES							12	8	NO	15	No	MX	N0	T1	6778		TUMOR FREE			NO
TCGA-44-6144-11A					58		119.76.0	Nationwide Children's Hospital	TCGA-44-6144-F28683	4731cc65-66df-442b-ba6c-c440bd44e8b0	TCGA-44-6144	22	28			0	399	Lung Adenocarcinoma	82						75A0C354-4ABE-4501-BE62-6734216876A9	Scheduled Follow-up Submission	Progressive Disease	No	YES							12	2	YES	67.5	No	M0	N0	T1a	6144		WITH TUMOR	97	77	NO
TCGA-55-6985-11A					58		160.69.0	Nationwide Children's Hospital	TCGA-55-6985-F37056	F432F92C-4BB0-437C-A742-B9E6B4BD8E55	TCGA-55-6985	22	22			0		Lung Adenocarcinoma			NO			NO	B2142758-692D-4D06-BEC4-4EAEF664F212	Scheduled Follow-up Submission		No	YES		NO				YES	12	2	NO	50	No	MX	N0	T2	6985		TUMOR FREE			NO
TCGA-44-6147-11A				NO	67		119.76.0	Nationwide Children's Hospital	TCGA-44-6147-F20460	7717ec1a-6c2f-486f-a3f4-3a5d0ddb4e2d	TCGA-44-6147	22	13			0		Lung Adenocarcinoma	68	2					9844E3DA-7E02-4756-8835-3FD69AA0A5C6	Scheduled Follow-up Submission	Complete Remission/Response	No	YES							12	1	NO		Yes	M0	NX	T1b	6147	Other	TUMOR FREE			NO
TCGA-50-5930-11A	NO	YES		NO	47		119.76.0	Nationwide Children's Hospital	TCGA-50-5930-F32064	51c0573d-cbd9-4d7a-a72a-1e71ab3ae05a	TCGA-50-5930	22	16			0	177	Lung Adenocarcinoma							EDEDBF13-5368-459C-B113-8786BA1023AE	Scheduled Follow-up Submission	Progressive Disease	No	YES						NO	12	5	YES		No	M0	N2	T2	5930		WITH TUMOR			YES
TCGA-44-2661-11A					69		52.74.0	Nationwide Children's Hospital	TCGA-44-2661-F5051	7ac97c53-3160-4567-ba1e-bac4b06376cd	TCGA-44-2661	22	8			0		Lung Adenocarcinoma		1					5098DD80-F752-46BA-9CE8-45250214416F		Complete Remission/Response	No	YES		NO					12	10	NO		Yes	M0	N0	T1	2661	Pre-Adjuvant Therapy	TUMOR FREE			NO
TCGA-91-6849-11A					75		160.69.0	Nationwide Children's Hospital	TCGA-91-6849-F32642	7A852ADD-9BFF-47D8-8ACB-A7FAAB892A7C	TCGA-91-6849	22	5			0		Lung Adenocarcinoma	66		YES				211F9E0B-90BC-4C06-B723-1A4D01BFF7E3	Scheduled Follow-up Submission		No	YES		NO				YES	12	6		30	No	MX	N2	T2	6849			75	86
TCGA-50-5946-02A	YES	YES	NO	YES	62		119.76.0	Nationwide Children's Hospital	TCGA-50-5946-F32143	28fbb9d8-ddc3-44a6-9f34-2ee25dbe35c3	TCGA-50-5946	22	17		221	0	221	Lung Adenocarcinoma							99CF2C04-60DF-42B2-8C25-D5E4D1122F1C	Scheduled Follow-up Submission	Progressive Disease	No	YES						NO	12	5	YES		No	MX	N0	T1	5946		WITH TUMOR			NO
TCGA-50-5066-02A	YES	NO	NO	YES	72		84.73.0	Nationwide Children's Hospital	TCGA-50-5066-F32028	e8fd3201-f957-4c6e-9942-c2fc7699fcd8	TCGA-50-5066	22	15		598	0	477	Lung Adenocarcinoma			YES			YES	440B40A6-87D5-43FC-A7F6-E55211A1D92D	Scheduled Follow-up Submission	Progressive Disease	No	YES		YES	NO			NO	12	5	YES		No	M0	N0	T2	5066		WITH TUMOR			YES
TCGA-62-A46Y-01A					70		258.59.0	Nationwide Children's Hospital			TCGA-62-A46Y	22				0		Lung Adenocarcinoma			NO			NO	5D8A9920-3878-4D12-86BC-635E0E7B94AA			No	YES		NO			Peripheral Lung		12				No	M0	N2	T2	A46Y
TCGA-55-7903-01A					64		196.64.0	Nationwide Children's Hospital	TCGA-55-7903-F47840	A3E1AF4A-8377-4442-A98B-0F3218B1E228	TCGA-55-7903	22	29			0		Lung Adenocarcinoma	83		NO			NO	BD24644B-3960-4782-BC45-8EF34EFF8546	Scheduled Follow-up Submission	Complete Remission/Response	No	YES		NO				NO	12	8	NO	40	No	MX	N0	T1b	7903		TUMOR FREE			NO
TCGA-97-8179-01A					72		222.60.0	Nationwide Children's Hospital	TCGA-97-8179-F44247	0FB47890-87D5-4A74-80DE-3F0F16E906DB	TCGA-97-8179	22	19			0		Lung Adenocarcinoma	73		YES		FISH	YES	6143DE7A-EA33-4F56-A581-BA1BEA9E8BB7	Scheduled Follow-up Submission	Complete Remission/Response	No	YES		YES	NO			NO	12	6	NO	60	No	M0	N0	T1a	8179		TUMOR FREE	91	95	NO
TCGA-64-5774-01A	NO	YES		YES	60		84.73.0	Nationwide Children's Hospital	TCGA-64-5774-F11400	4fe330f5-c1e9-4079-93ae-28cc03a377c3	TCGA-64-5774	22	2		277	0	246	Lung Adenocarcinoma	95						DA1FCA87-2E7F-4F4E-B473-11D2C0656F11		Complete Remission/Response	No	YES					Central Lung		12	5	YES	45	No	M0	N0	T2	5774		TUMOR FREE			NO
TCGA-55-8092-01A	NO	NO	NO		75		213.60.0	Nationwide Children's Hospital	TCGA-55-8092-F46643	08F57135-8BDA-492F-9F56-7D5C9BEF9DDE	TCGA-55-8092	22	13			0	127	Lung Adenocarcinoma	19						FC12DB6F-50D7-4537-ABEF-6C0A05911970	Scheduled Follow-up Submission	Progressive Disease	No	YES						NO	12	8	YES	40	No	MX	N0	T3	8092		WITH TUMOR	2	19	NO
TCGA-55-6982-01A	YES	YES	NO	YES	79		160.69.0	Nationwide Children's Hospital	TCGA-55-6982-F46626	482B5DF1-D91C-483A-ACE3-C2C65F5FA3DD	TCGA-55-6982	22	13		183	0	183	Lung Adenocarcinoma			NO			NO	772514A4-BB8E-48F2-A67D-F86912400321	Scheduled Follow-up Submission	Progressive Disease	No	YES		NO				NO	12	8	YES		No	M0	N1	T2	6982		WITH TUMOR			NO
TCGA-50-8457-01A					63		232.55.0	Nationwide Children's Hospital	TCGA-50-8457-F69333	C2D58752-6A3C-46E7-9BF4-34591B2C0C16	TCGA-50-8457	22	5			0		Lung Adenocarcinoma			YES		FISH	YES	E248A740-F95F-4E5E-A319-863FF26B5C1C	Scheduled Follow-up Submission	Complete Remission/Response	No	YES		YES	YES	G12A		NO	12	1	NO	30	No	M0	N0	T1a	8457		TUMOR FREE			NO
TCGA-69-7974-01A					54		204.62.0	Nationwide Children's Hospital	TCGA-69-7974-F30365	21EB1C00-AEF8-466D-B783-A523818D00B2	TCGA-69-7974	22	9			0		Lung Adenocarcinoma			YES	Other			E50521E4-9D65-437B-B1A1-470B48226951	Scheduled Follow-up Submission	Progressive Disease	No	YES	80				Peripheral Lung		12	4	NO	30	No	MX	N2	T2a	7974	Post-Adjuvant Therapy	WITH TUMOR			YES
TCGA-69-8453-01A	YES	YES	NO		77		232.55.0	Nationwide Children's Hospital	TCGA-69-8453-F52051	70276434-5352-4885-B9F5-681F889F8DA0	TCGA-69-8453	22	27			0	344	Lung Adenocarcinoma	52						73893331-FAA9-4F18-A391-29EECF794D76	Scheduled Follow-up Submission		No	YES					Peripheral Lung	NO	12	11	YES	12	No	MX	N0	T3	8453		WITH TUMOR	87	85	YES
TCGA-55-8097-01A					60		213.60.0	Nationwide Children's Hospital	TCGA-55-8097-F47821	CD4B0E92-54B8-474F-AAD7-FB4A9C9CE4E3	TCGA-55-8097	22	28			0		Lung Adenocarcinoma	74		NO			NO	94CFF040-2AD7-4097-ABB1-05B398CA456D	Scheduled Follow-up Submission	Complete Remission/Response	No	YES		NO				NO	12	8	NO	35	No	MX	N0	T1a	8097		TUMOR FREE		87	NO
TCGA-05-4396-01A					76		144.70.0	Nationwide Children's Hospital			TCGA-05-4396	22				0		Lung Adenocarcinoma							F3D3C6CE-AAF8-483C-926A-C45A6B570F99			No	YES							12			19	Yes	M0	N1	T4	4396
TCGA-44-3396-01A					74		58.77.0	Nationwide Children's Hospital	TCGA-44-3396-F5016	5e3024c8-c8ce-42c6-bfec-8fbe87e3146a	TCGA-44-3396	22	22			0		Lung Adenocarcinoma	48	1					4B51A33D-6C3B-4DAD-8509-7E8E0FF89DA2		Complete Remission/Response	No	YES		NO					12	10	NO	50	No	M0	N2	T2	3396	Adjuvant therapy	TUMOR FREE			YES
TCGA-05-5429-01A					60		84.73.0	Nationwide Children's Hospital	TCGA-05-5429-F36396	6271312D-642D-4C7C-AF77-B70D79E7B2CC	TCGA-05-5429	22	30			0		Lung Adenocarcinoma							6853337D-7E1D-4AEA-86E5-9A18E3631CC3	Scheduled Follow-up Submission		No	YES						NO	12	10			No	M0	N2	T3	5429
TCGA-97-7546-01A	YES	YES			76		166.67.0	Nationwide Children's Hospital	TCGA-97-7546-F31995	14A442B8-34A0-48DF-A9B0-6768DA7DE62F	TCGA-97-7546	22	15			0	1255	Lung Adenocarcinoma	60						8159A785-3D53-4EEB-B09A-0B7E8373BD2C	Additional New Tumor Event		No	YES						NO	12	5	YES	25	No	MX	N0	T1	7546		WITH TUMOR	96	84	YES
TCGA-NJ-A4YP-01A					52		278.56.0	Nationwide Children's Hospital	TCGA-NJ-A4YP-F50888	5B07D5AE-C22E-4DED-8460-EA2FE846A2B4	TCGA-NJ-A4YP	22	1			0		Lung Adenocarcinoma			NO			NO	C8CF5FD6-42ED-458C-9563-CA582099368A	Scheduled Follow-up Submission	Stable Disease	No	YES		NO				YES	12	11	NO	60	No	M0	N0	T2a	A4YP
TCGA-05-4420-01A					41		58.77.0	Nationwide Children's Hospital	TCGA-05-4420-F36531	F35DE973-C732-4FC5-9C26-51A06531E0A2	TCGA-05-4420	22	1			0		Lung Adenocarcinoma							45AB6C3C-7368-42F2-A235-41472D5F9F3D	Scheduled Follow-up Submission	Complete Remission/Response	No	YES						NO	12	11	NO	38	No	M0	N0	T2	4420		TUMOR FREE			NO
TCGA-95-7562-01A					71		213.60.0	Nationwide Children's Hospital	TCGA-95-7562-F32832	CCBA82F1-C522-4EF5-B5BB-A1F58E29ED89	TCGA-95-7562	22	13			0		Lung Adenocarcinoma	57	1					372D63DC-15C7-4B1C-BCF0-3692CCC9D5E7	Scheduled Follow-up Submission		No	YES						NO	12	6	NO	10	Yes, History of Prior Malignancy	M0	N1	T2a	7562	Post-Adjuvant Therapy	TUMOR FREE	72	90	YES
TCGA-55-1596-01A					55		37.77.0	Nationwide Children's Hospital	TCGA-55-1596-F40544	123C8E70-9662-45C2-80BF-E22343435AD4	TCGA-55-1596	22	22			0		Lung Adenocarcinoma							4CE8C47F-95E9-41C4-B2D6-C82AC4A8D986	Scheduled Follow-up Submission	Complete Remission/Response	No	YES						NO	12	2	NO	50	No	M0	N1	T2	1596		TUMOR FREE			YES
TCGA-78-8662-01A					53		238.60.0	Nationwide Children's Hospital			TCGA-78-8662	22				0		Lung Adenocarcinoma	76		NO			NO	09DDF21F-25A7-40D3-A00F-22FE2C1C6A57			No	YES		NO			Peripheral Lung		12			45	No	M0	N0	T2	8662
TCGA-97-A4M6-01A					45		264.60.0	Nationwide Children's Hospital	TCGA-97-A4M6-F57434	5B7F6A58-58A0-4D88-A6E1-339DD38CBEC4	TCGA-97-A4M6	22	11			0		Lung Adenocarcinoma	92	0	YES	Exon 19 Deletion		NO	F924BEFA-7024-4671-AA15-92B27D5FCC75	Scheduled Follow-up Submission	Complete Remission/Response	No	YES		YES	NO			NO	12	3	NO		No	M0	N0	T1a	A4M6	Other	TUMOR FREE	95	116	NO
TCGA-62-8399-01A					62		232.55.0	Nationwide Children's Hospital	TCGA-62-8399-F52545	147B5527-FA29-41B2-92BD-C0882730DDC1	TCGA-62-8399	22	4			0		Lung Adenocarcinoma			NO			NO	FE585024-14BB-4118-A4A9-891EAC3C47CB	Scheduled Follow-up Submission	Complete Remission/Response	No	YES	100	NO			Peripheral Lung	NO	12	12	NO	70	No	M0	N2	T2	8399	Preoperative	TUMOR FREE			NO
TCGA-55-8514-01A					70		238.60.0	Nationwide Children's Hospital	TCGA-55-8514-F57917	6DD813FA-5CF4-4E9F-AA13-F9EA9CC8391B	TCGA-55-8514	22	28			0		Lung Adenocarcinoma	90						1D4F9929-2E29-46ED-86F0-A150858851E9	Scheduled Follow-up Submission	Complete Remission/Response	No	YES						NO	12	3	NO	20	No	MX	N0	T2a	8514		TUMOR FREE			NO
TCGA-44-2657-01A					74		52.74.0	Nationwide Children's Hospital	TCGA-44-2657-F5295	c8b44a22-7cab-4d8d-a222-c557b242790d	TCGA-44-2657	22	8			0		Lung Adenocarcinoma	96	0					D7B9064E-AF2B-4146-927B-B60B3DA894FD		Complete Remission/Response	No	YES		NO					12	10	NO	25	No	M0	NX	T2	2657	Pre-Adjuvant Therapy	TUMOR FREE	87	147	NO
TCGA-44-6777-01A					85		144.70.0	Nationwide Children's Hospital	TCGA-44-6777-F15694	d62760e3-307f-4aad-a7b8-1ab9f020e3f7	TCGA-44-6777	22	30			0		Lung Adenocarcinoma	178	3					2DB9C960-F21D-4A59-850D-19E21F5F3EC4	Scheduled Follow-up Submission		No	YES							12	8	NO	64	No	MX	NX	T2	6777	Post-Adjuvant Therapy	TUMOR FREE	77	71	NO
TCGA-55-A490-01A					78		258.59.0	Nationwide Children's Hospital	TCGA-55-A490-F59076	813389EA-D9E4-47C0-B21A-5FA647E9EEB8	TCGA-55-A490	22	30			0		Lung Adenocarcinoma	40		YES		FISH	YES	CF311A9C-EAA6-4C79-AF83-C551AE6FF004	Scheduled Follow-up Submission		No	YES		YES	YES	G12C	Peripheral Lung	NO	12	4	NO	34	No	MX	N0	T2b	A490		TUMOR FREE			YES
TCGA-75-6212-01A							119.76.0	Nationwide Children's Hospital	TCGA-75-6212-F15102	3befd11c-b526-47a9-8f68-01705132520b	TCGA-75-6212	22	21					Lung Adenocarcinoma		0					8CFFC6FB-65AF-49DB-9278-AD2B453B713D		Complete Remission/Response	No	YES					Peripheral Lung		12	7	YES		No	M0	N1	T2	6212	Post-Adjuvant Therapy	TUMOR FREE			YES
TCGA-75-6203-01A							119.76.0	Nationwide Children's Hospital	TCGA-75-6203-F15862	54091978-b5ea-4fa4-b94e-a707f5389de7	TCGA-75-6203	22	15					Lung Adenocarcinoma							223C1463-C98A-4FFC-93EA-69C9974AFDF4		Complete Remission/Response	No	YES							12	8			No	M0	N2	T2	6203					YES
TCGA-71-6725-01A	NO	YES	NO		48		144.70.0	Nationwide Children's Hospital	TCGA-71-6725-F70928	91E9D55E-8826-486C-8511-B70EB38747D7	TCGA-71-6725	22	10			0	164	Lung Adenocarcinoma		2					3FD26105-3832-4905-8FA9-C7C2482D3425	Scheduled Follow-up Submission	Progressive Disease	No	YES						NO	12	3	YES		No	M0	N0	T2	6725	Post-Adjuvant Therapy	WITH TUMOR			YES
TCGA-73-4676-01A					45		119.76.0	Nationwide Children's Hospital	TCGA-73-4676-F12553	f8c9076a-23b2-4792-bcbc-c88d250d1ff3	TCGA-73-4676	22	18			0		Lung Adenocarcinoma	86	0	NO			NO	BC836CC8-588C-40CD-BC42-76D29F900F72			Yes	YES	90	NO			Peripheral Lung		12	5	NO	48	No	M0	N1	T2a	4676	Adjuvant therapy				YES
TCGA-78-8655-01A					77		238.60.0	Nationwide Children's Hospital	TCGA-78-8655-F46154	36A22148-00C4-4964-A2D4-6D5680C6D49F	TCGA-78-8655	22	28			0		Lung Adenocarcinoma	93		NO			NO	5E561BD8-0E7D-49F0-B4DF-7F7AC69D0FB9	Scheduled Follow-up Submission		No	YES		NO			Peripheral Lung	YES	12	8		10	No	M0	N0	T1	8655
TCGA-35-3615-01A					57		37.77.0	Nationwide Children's Hospital	TCGA-35-3615-F68919	DEA1DE43-7C05-44A1-ABEF-9C495D3A8150	TCGA-35-3615	22	24			0		Lung Adenocarcinoma			NO			NO	D358F4C9-95C6-497A-80E0-EF26059050B3	Scheduled Follow-up Submission		No	YES		NO			Peripheral Lung	YES	12	8			No	M0	N0	T2	3615
TCGA-80-5608-01A							160.69.0	Nationwide Children's Hospital	TCGA-80-5608-F15870	242c20b9-5323-4ed7-91f3-3620555f7814	TCGA-80-5608	22	15					Lung Adenocarcinoma							BE07F9BF-8FC2-4F01-ADB9-72F51D970FF3			No	YES					Peripheral Lung		12	8	NO	26	No	M0	N0	T1	5608		TUMOR FREE			NO
TCGA-55-6971-01A					59		160.69.0	Nationwide Children's Hospital	TCGA-55-6971-F56190	12A8DE46-0514-47CB-A544-77296F337007	TCGA-55-6971	22	29			0		Lung Adenocarcinoma			NO			NO	EE5118B4-197B-4A44-A1AF-EDB3D22441E7	Scheduled Follow-up Submission	Complete Remission/Response	No	YES		NO				NO	12	1	NO	60	No	MX	N0	T2	6971		TUMOR FREE			NO
TCGA-93-A4JQ-01A					49		264.60.0	Nationwide Children's Hospital	TCGA-93-A4JQ-F57022	7F31161F-621B-476D-A8D8-D67E63CED9D9	TCGA-93-A4JQ	22	28			0		Lung Adenocarcinoma	83		NO			NO	4BCF6682-05A2-4316-9392-973FC679B59D	Scheduled Follow-up Submission	Complete Remission/Response	No	YES		NO				NO	12	2	NO		Yes, History of Prior Malignancy	MX	N0	T1b	A4JQ		TUMOR FREE	97	100	NO
TCGA-05-4430-01A					59		58.77.0	Nationwide Children's Hospital	TCGA-05-4430-F36427	A35C227E-F4EF-4535-9765-FD2DAD9B0C06	TCGA-05-4430	22	30			0		Lung Adenocarcinoma							8340DEA4-BC88-4AA9-932C-3C1657667674	Scheduled Follow-up Submission	Complete Remission/Response	No	YES						NO	12	10	NO	80	No	M0	N0	T2	4430		TUMOR FREE
TCGA-86-7711-01A					70		183.66.0	Nationwide Children's Hospital	TCGA-86-7711-F36464	A9C3D370-F629-4A00-A8EF-8DA24B519C43	TCGA-86-7711	22	31			0		Lung Adenocarcinoma		0					574C1EC5-A14A-4E59-8CD7-180CCB0C1B61	Scheduled Follow-up Submission	Progressive Disease	No	YES	100	NO			Peripheral Lung	NO	12	10	NO	50	No	M0	N1	T2a	7711	Post-Adjuvant Therapy	WITH TUMOR			YES
TCGA-MP-A4TK-01A	YES	YES		NO	56		264.60.0	Nationwide Children's Hospital	TCGA-MP-A4TK-F41426	445D9B7D-F0FC-4879-AC28-B16DC3E929A5	TCGA-MP-A4TK	22	18			0	545	Lung Adenocarcinoma	88		NO			NO	E17FB55B-79DA-4D88-BFAE-6FC9D48A7E11	Additional New Tumor Event	Progressive Disease	No	YES		NO				NO	12	3	YES	28	No	MX	N1	T2	A4TK		WITH TUMOR		64	NO
TCGA-55-8299-01A	NO	YES	NO	NO	61		222.60.0	Nationwide Children's Hospital	TCGA-55-8299-F57915	A9C89030-2543-4E48-87D9-5FA314877305	TCGA-55-8299	22	28			0	274	Lung Adenocarcinoma							1D978789-151D-49D4-A3C7-A9B687D681BB	Scheduled Follow-up Submission	Progressive Disease	No	YES						NO	12	3	YES	20	No	MX	N0	T1b	8299		WITH TUMOR			NO
TCGA-49-4514-01A					79		144.70.0	Nationwide Children's Hospital	TCGA-49-4514-F14817	8e78115f-ef3f-4e4f-b8e4-16fdf02e5002	TCGA-49-4514	22	10			0		Lung Adenocarcinoma							1ADBC29A-001B-4F59-B9E0-1FA1C7DF707F	Scheduled Follow-up Submission		No	YES							12	8	NO	65	No	M0	N0	T1	4514					NO
TCGA-38-4632-01A	YES	NO	NO	NO	42		119.76.0	Nationwide Children's Hospital	TCGA-38-4632-F4839	ecb636f6-dc7d-48c5-9a00-02aec73f03b1	TCGA-38-4632	22	13			0	680	Lung Adenocarcinoma			NO			NO	4E0B9642-1D15-4D8E-80EA-CA0A727815F0		Stable Disease	No	YES		NO			Peripheral Lung		12	12	YES	10	No	M1	N1	T2	4632		WITH TUMOR			NO
TCGA-38-A44F-01A					80		258.59.0	Nationwide Children's Hospital	TCGA-38-A44F-F47557	25815E78-A0C8-4308-9087-3C032BCFED78	TCGA-38-A44F	22	26			0		Lung Adenocarcinoma	35		NO		FISH	YES	20DE4FBA-C489-483D-BFE8-F90984E5BB24	Scheduled Follow-up Submission		No	YES		NO			Peripheral Lung	YES	12	8		12	No	M0	N0	T2a	A44F			71
TCGA-78-7535-01A	NO	NO	NO	YES	45		183.66.0	Nationwide Children's Hospital	TCGA-78-7535-F20633	63e1af54-b78a-4f59-9871-30d86f0546f6	TCGA-78-7535	22	19		809	0	809	Lung Adenocarcinoma			NO			NO	183C1D3D-0C75-4D44-A437-86B864FEE961	Scheduled Follow-up Submission	Progressive Disease	No	YES		NO					12	1	YES	35	No	M0	N0	T2	7535		WITH TUMOR			YES
TCGA-69-8255-01A					71		222.60.0	Nationwide Children's Hospital	TCGA-69-8255-F32611	C4D99C65-5914-401C-9071-C2ED9877F39C	TCGA-69-8255	22	4			0		Lung Adenocarcinoma	60		YES	Other		NO	FE6A4CC3-0959-4BED-B8D5-3A5BC38CBA57	Scheduled Follow-up Submission		No	YES		NO				NO	12	6	NO	40	No	M0	N0	T1a	8255				60	NO
TCGA-MP-A4TA-01A					75		264.60.0	Nationwide Children's Hospital			TCGA-MP-A4TA	22				0		Lung Adenocarcinoma	46		NO			NO	41C58A44-0719-423C-8C17-32724A99E21F			No	YES		NO			Peripheral Lung		12			55	Yes, History of Prior Malignancy	M0	N0	T1	A4TA				74
TCGA-55-A48Y-01A					69		258.59.0	Nationwide Children's Hospital	TCGA-55-A48Y-F59057	D3AB8E13-5211-4F85-B576-F476B974C2D1	TCGA-55-A48Y	22	30			0		Lung Adenocarcinoma	42						299DA382-EB81-4096-ACF4-EAA34F61B36E	Scheduled Follow-up Submission	Complete Remission/Response	No	YES						NO	12	4	NO	50	No	M0	N0	T2b	A48Y		TUMOR FREE			YES
TCGA-53-7626-01A	NO	NO	NO		76		183.66.0	Nationwide Children's Hospital	TCGA-53-7626-F38969	8B9047BD-EFD5-41E5-863C-04D4F982B422	TCGA-53-7626	22	15			0	865	Lung Adenocarcinoma			NO			NO	2120B0AF-E074-4991-B064-C2A871884CC8	Scheduled Follow-up Submission	Progressive Disease	No	YES		NO			Peripheral Lung	NO	12	1	YES	35	No	M0	N1	T1	7626		WITH TUMOR			YES
TCGA-50-5941-01A					55		119.76.0	Nationwide Children's Hospital	TCGA-50-5941-F32129	f165ea21-c724-4532-8246-fa21fc059d3e	TCGA-50-5941	22	17			0		Lung Adenocarcinoma							F4EC3B5D-C9AB-40BB-80AF-FD90B7C4366B	Scheduled Follow-up Submission	Complete Remission/Response	No	YES							12	5	NO	25	No	M0	N2	T2a	5941		TUMOR FREE			YES
TCGA-64-5775-01A					71		84.73.0	Nationwide Children's Hospital	TCGA-64-5775-F11418	ef8d69d0-68e9-401f-a2c7-795dffabb80f	TCGA-64-5775	22	2			0		Lung Adenocarcinoma							65F9E3B0-D2A7-415C-A9A9-535E871F41FA		Progressive Disease	Yes	YES	0						12	5	NO	110	No	M0	N0	T4	5775		WITH TUMOR			NO
TCGA-05-4422-01A					68		58.77.0	Nationwide Children's Hospital			TCGA-05-4422	22				0		Lung Adenocarcinoma							E2343778-3387-4484-9E6B-104232B3F50F			No	YES							12			147	No	M0	N0	T2	4422
TCGA-86-A4D0-01A					48		258.59.0	Nationwide Children's Hospital	TCGA-86-A4D0-F52852	7EA60B7C-46CC-46A0-90F7-88199CDE946A	TCGA-86-A4D0	22	6			0		Lung Adenocarcinoma			NO			NO	5B687F00-0BDD-418C-BCB1-C0A90B5E813F	Scheduled Follow-up Submission	Complete Remission/Response	No	YES		NO				NO	12	12	NO		No	M0	N0	T2b	A4D0		TUMOR FREE			YES
TCGA-49-4494-01A					77		58.77.0	Nationwide Children's Hospital	TCGA-49-4494-F58840	7264A47D-2B6F-445A-94E5-514CA2BE320F	TCGA-49-4494	22	25			0		Lung Adenocarcinoma		1					43F286E4-C642-4F76-8134-8CFF2BEB7220	Scheduled Follow-up Submission		No	YES	90					NO	12	4		50	No	M0	N2	T3	4494	Preoperative
TCGA-55-7913-01B	NO	YES		NO	61		213.60.0	Nationwide Children's Hospital	TCGA-55-7913-F57911	6CBD65CC-277E-43D4-BE2E-641C6AB8FF29	TCGA-55-7913	22	28			0	480	Lung Adenocarcinoma			YES		FISH	YES	2A7ECCF9-81F5-4983-BB5C-687569CA89DC	Scheduled Follow-up Submission	Progressive Disease	No	YES		YES	NO		Central Lung	NO	12	3	YES	40	No	MX	N0	T1b	7913		WITH TUMOR			NO
TCGA-55-8619-01A					72		238.60.0	Nationwide Children's Hospital	TCGA-55-8619-F57919	127448B8-A332-41F4-BDDF-9AAC9647E785	TCGA-55-8619	22	28			0		Lung Adenocarcinoma							477D9703-5D44-4326-A83E-C2E0525EAC26	Scheduled Follow-up Submission	Complete Remission/Response	No	YES						NO	12	3	NO		Yes, History of Prior Malignancy	MX	N0	T3	8619		TUMOR FREE			NO
TCGA-86-8280-01A					54		222.60.0	Nationwide Children's Hospital	TCGA-86-8280-F66079	F949DB0E-42F2-40F9-B663-70562177DC57	TCGA-86-8280	22	2			0		Lung Adenocarcinoma		0					22199CC2-E6D6-488B-81A9-CD0B9E25B7CF	Scheduled Follow-up Submission	Complete Remission/Response	No	YES	100	NO			Peripheral Lung	NO	12	10	NO		No	M0	N0	T2b	8280	Other	TUMOR FREE			YES
TCGA-86-7701-01A	YES	NO		NO	66		196.64.0	Nationwide Children's Hospital	TCGA-86-7701-F36476	277C6CF8-C341-45A1-AC77-78CA122BDD86	TCGA-86-7701	22	31			0	424	Lung Adenocarcinoma		0					A7640DD2-16F8-4980-B6E0-F996A7B14956	Scheduled Follow-up Submission	Stable Disease	No	YES	100				Peripheral Lung	NO	12	10	YES		No	M1	N0	T2	7701	Post-Adjuvant Therapy	WITH TUMOR			YES
TCGA-55-7570-01A					60		166.67.0	Nationwide Children's Hospital	TCGA-55-7570-F56185	A3150ABF-460E-41B1-8D92-F9298F52C36B	TCGA-55-7570	22	29			0		Lung Adenocarcinoma							28646A8C-D1E7-4A1F-B0E5-BF2AC5C5EAED	Scheduled Follow-up Submission	Complete Remission/Response	No	YES						NO	12	1	NO		No	MX	N0	T1a	7570		TUMOR FREE			NO
TCGA-97-7941-01A					72		204.62.0	Nationwide Children's Hospital	TCGA-97-7941-F33765	BB66B454-B72A-45B2-9CF6-FDF7E2D2CE4D	TCGA-97-7941	22	13			0		Lung Adenocarcinoma	57		YES			NO	69C3060A-79A7-453E-B098-5A08B8DE2D01	Scheduled Follow-up Submission		No	YES		YES	YES	G12A		NO	12	8	NO	22.5	No	MX	N0	T1b	7941		TUMOR FREE	81	98	NO
TCGA-50-5044-01A	YES	YES	NO	NO	72		144.70.0	Nationwide Children's Hospital	TCGA-50-5044-F31976	699a5471-d724-47d8-9a63-e846f461acd2	TCGA-50-5044	22	14			0	483	Lung Adenocarcinoma							178EF4C6-31F7-4E10-8D18-30F725FBED40	Scheduled Follow-up Submission	Progressive Disease	No	YES						NO	12	5	YES		No	M0	N1	T4	5044		WITH TUMOR			NO
TCGA-44-6775-01A					72		144.70.0	Nationwide Children's Hospital	TCGA-44-6775-F30930	b3652245-e7e8-4b5a-b946-07b14256210b	TCGA-44-6775	22	19			0		Lung Adenocarcinoma	66						66938B0B-E171-4F77-9634-70C20BF6A96D	Scheduled Follow-up Submission	Complete Remission/Response	No	YES							12	4	NO	25	No	MX	N0	T2a	6775		TUMOR FREE	89	72
TCGA-44-6775-01C					72		144.70.0	Nationwide Children's Hospital	TCGA-44-6775-F30930	b3652245-e7e8-4b5a-b946-07b14256210b	TCGA-44-6775	22	19			0		Lung Adenocarcinoma	66						66938B0B-E171-4F77-9634-70C20BF6A96D	Scheduled Follow-up Submission	Complete Remission/Response	No	YES							12	4	NO	25	No	MX	N0	T2a	6775		TUMOR FREE	89	72
TCGA-62-A46O-01A					65		258.59.0	Nationwide Children's Hospital			TCGA-62-A46O	22				0		Lung Adenocarcinoma			NO			NO	E67BC76C-C196-4E8F-A275-B7859CA6DAAE			No	YES		NO			Central Lung		12			48	No	M0	N0	T2	A46O
TCGA-78-7220-01A	NO	YES	NO	NO	53		166.67.0	Nationwide Children's Hospital	TCGA-78-7220-F19298	6125a3be-8022-43a7-8d60-00e74d6061c3	TCGA-78-7220	22	8			0	531	Lung Adenocarcinoma			NO			NO	D4BDF08C-6FBB-41EE-A68A-DCC73AF0657D	Scheduled Follow-up Submission		No	YES		NO			Peripheral Lung		12	12	YES	35	No	M0	N2	T2	7220		WITH TUMOR			NO
TCGA-55-6975-01A					61		160.69.0	Nationwide Children's Hospital	TCGA-55-6975-F45635	2CC60EBB-2FF5-41FE-8FCF-9C419EDDE7D9	TCGA-55-6975	22	17			0		Lung Adenocarcinoma			NO			NO	58F6DDDC-393F-4CE1-84E4-9DA898392D1E	Scheduled Follow-up Submission	Progressive Disease	No	YES		NO				NO	12	7	NO		No	M0	N1	T2	6975		WITH TUMOR			NO
TCGA-55-6981-01A					53		160.69.0	Nationwide Children's Hospital	TCGA-55-6981-F56243	1E30CFED-13C2-4A05-B32F-1A96D4DE789B	TCGA-55-6981	22	30			0		Lung Adenocarcinoma			NO			NO	302CD38E-B25E-4BC0-A75F-A97D786A7965	Scheduled Follow-up Submission	Complete Remission/Response	No	YES		NO				NO	12	1	NO		No	M0	N2	T1	6981		TUMOR FREE			YES
TCGA-55-8507-01A					53		238.60.0	Nationwide Children's Hospital	TCGA-55-8507-F48792	46ECC264-1E48-4AA2-BE86-30B8AB909150	TCGA-55-8507	22	20			0		Lung Adenocarcinoma							41630619-0CE6-4541-BA28-1FC556972E4C	Scheduled Follow-up Submission	Complete Remission/Response	No	YES					Peripheral Lung	NO	12	9	NO	120	No	MX	N0	T1a	8507		TUMOR FREE			NO
TCGA-86-8056-01A					63	Right upper, lower	213.60.0	Nationwide Children's Hospital	TCGA-86-8056-F57951	38936117-0356-4D10-A167-483740FE2A8B	TCGA-86-8056	22	28			0		Lung Adenocarcinoma			NO			NO	D33FFE7D-EDCD-4C4D-A899-85324F21407B	Scheduled Follow-up Submission		No	YES		NO			Peripheral Lung	YES	12	3		36	No	M0	N0	T4	8056
TCGA-49-AAR3-01A					69		423.36.0	Nationwide Children's Hospital	TCGA-49-AAR3-F70567	9B56C5FC-1A78-41F4-8707-440A0C3F8FFF	TCGA-49-AAR3	22	25			0		Lung Adenocarcinoma		0					9AC829B2-DB73-44F5-8432-E8637ED88B0E	Scheduled Follow-up Submission	Complete Remission/Response	No	YES	100					NO	12	2	NO		No	MX	N1	T2	AAR3	Post-Adjuvant Therapy				YES
TCGA-75-5146-01A							84.73.0	Nationwide Children's Hospital	TCGA-75-5146-F11744	d54f5d79-f71c-4fc5-8a86-be0e098fae39	TCGA-75-5146	22	6					Lung Adenocarcinoma			NO			NO	5ABBC33B-BD9F-4DCA-AD7D-6B14FEDF8305		Complete Remission/Response	No	YES		NO			Peripheral Lung		12	4	NO		No	M0	N0	T2	5146	Adjuvant therapy	TUMOR FREE			NO
TCGA-78-7542-01A					56		183.66.0	Nationwide Children's Hospital	TCGA-78-7542-F20456	d15aada7-429d-413c-855e-e49c5ab30779	TCGA-78-7542	22	13			0		Lung Adenocarcinoma			NO			NO	A9F5EDE3-FAD1-4FE4-B30E-29CE5F5DF41D	Scheduled Follow-up Submission		No	YES		NO					12	1		60	No	M0	N0	T2	7542
TCGA-49-4512-01A					69		144.70.0	Nationwide Children's Hospital	TCGA-49-4512-F14815	5d052835-b26a-42e0-aa2d-fb53c06891f4	TCGA-49-4512	22	10			0		Lung Adenocarcinoma							176EFBB6-D0E9-44CB-9364-0E7427AB046B	Scheduled Follow-up Submission		No	YES							12	8	NO		No	MX	N2	T2	4512		WITH TUMOR			YES
TCGA-44-6776-01A					60		144.70.0	Nationwide Children's Hospital	TCGA-44-6776-F15756	452c565f-f54c-4dcb-b781-4c6940df5e67	TCGA-44-6776	22	31			0		Lung Adenocarcinoma	80						47D97B9D-EE24-466A-80FE-2DCF52A53F1C	Scheduled Follow-up Submission	Complete Remission/Response	No	YES							12	8	NO	45	Yes	MX	N0	T1	6776		TUMOR FREE	85	82	NO
TCGA-78-7162-01A	NO	YES	NO	NO	75		183.66.0	Nationwide Children's Hospital	TCGA-78-7162-F17125	19df3a15-5642-4b23-ab3b-d6fbc2d17193	TCGA-78-7162	22	3			0	2218	Lung Adenocarcinoma			NO			NO	761A9CBA-7622-48E3-AE28-BCBA9BEA9FA3	Scheduled Follow-up Submission		No	YES		NO			Peripheral Lung		12	10	YES	12	No	M0	N0	T1	7162					NO
TCGA-73-4658-01A					80		119.76.0	Nationwide Children's Hospital	TCGA-73-4658-F12975	54126ff4-4956-4563-97f0-8103fd637634	TCGA-73-4658	22	15			0		Lung Adenocarcinoma			NO				3EB262C4-B86E-4406-BEC5-6A5B157E57BE		Complete Remission/Response	No	YES		NO			Central Lung		12	6	NO	25	Yes	M0	N0	T2	4658		TUMOR FREE			NO
TCGA-44-7667-01A					49		183.66.0	Nationwide Children's Hospital	TCGA-44-7667-F19718	c40ab53b-c1c0-402e-aedc-d93158731d75	TCGA-44-7667	22	21			0		Lung Adenocarcinoma	50						A9DC5752-E020-408F-8C44-D708ACE33099	Scheduled Follow-up Submission	Complete Remission/Response	No	YES		NO					12	12	NO	50	No	MX	N0	T3	7667		TUMOR FREE			NO
TCGA-67-6215-01A					52		119.76.0	Nationwide Children's Hospital	TCGA-67-6215-F13585	98f5011f-0421-4bb4-a740-a06c2e8d8794	TCGA-67-6215	22	6			0		Lung Adenocarcinoma		2	NO			NO	BE8C06AE-580B-461A-AF70-2122230CD208	Scheduled Follow-up Submission		No	YES		NO			Central Lung		12	7	NO		No	M0	N0	T2a	6215	Adjuvant therapy	TUMOR FREE			YES
TCGA-73-7499-01A					81		204.62.0	Nationwide Children's Hospital	TCGA-73-7499-F48754	B21C6B2B-AE23-49B9-B9FE-0F1511785AA0	TCGA-73-7499	22	20			0		Lung Adenocarcinoma	54	1	NO			NO	D24B9BB6-B291-4D8B-931D-ACD390038944	Scheduled Follow-up Submission	Complete Remission/Response	No	YES	80	NO			Peripheral Lung	NO	12	9	NO		No	M0	N0	T2a	7499	Preoperative	TUMOR FREE			NO
TCGA-44-2666-01A	NO	NO	NO	NO	43		37.77.0	Nationwide Children's Hospital	TCGA-44-2666-F5304	3f3411e8-5a55-4b73-b4e9-42c1e7bfdf7d	TCGA-44-2666	22	12			0		Lung Adenocarcinoma	66						5DF1D642-3EF1-4DB9-8CA5-A27EB482C41B			No	YES		NO					12	10	NO	30	No	M0	N0	T2	2666		WITH TUMOR			NO
TCGA-44-2666-01B	NO	NO	NO	NO	43		37.77.0	Nationwide Children's Hospital	TCGA-44-2666-F5304	3f3411e8-5a55-4b73-b4e9-42c1e7bfdf7d	TCGA-44-2666	22	12			0		Lung Adenocarcinoma	66						5DF1D642-3EF1-4DB9-8CA5-A27EB482C41B			No	YES		NO					12	10	NO	30	No	M0	N0	T2	2666		WITH TUMOR			NO
TCGA-97-A4M2-01A					66		264.60.0	Nationwide Children's Hospital	TCGA-97-A4M2-F57453	C19E7A8D-1092-4915-BC25-8935E50F3DA1	TCGA-97-A4M2	22	12			0		Lung Adenocarcinoma	91		NO			NO	C52ADE6A-B2E2-4B2D-9936-E0FB9CA2981D	Scheduled Follow-up Submission	Complete Remission/Response	No	YES		YES	NO			NO	12	3	NO	100	Yes, History of Prior Malignancy	M0	N0	T1a	A4M2		TUMOR FREE	89	103	NO
TCGA-MP-A5C7-01A					76		278.56.0	Nationwide Children's Hospital	TCGA-MP-A5C7-F54544	2777977A-E3E5-4AFD-AE85-CCC79DF0E736	TCGA-MP-A5C7	22	19			0		Lung Adenocarcinoma	105		NO			NO	C14C1AC1-38AB-4E04-9882-76D1CFECA518	Scheduled Follow-up Submission	Complete Remission/Response	No	YES		NO			Central Lung	NO	12	12	NO	15	No	M0	N0	T2	A5C7		TUMOR FREE		93	NO
TCGA-97-7937-01A			NO		65		196.64.0	Nationwide Children's Hospital	TCGA-97-7937-F33767	483E201C-601E-4BEC-9BD0-EF8AFFBA9552	TCGA-97-7937	22	12			0		Lung Adenocarcinoma	89		YES		FISH	YES	BFF081D3-C0D4-4D28-A064-B6AAFE1F4082	Scheduled Follow-up Submission		No	YES		YES	NO			NO	12	9	NO	35	No	MX	N0	T2a	7937		TUMOR FREE			NO
TCGA-64-1678-01A					70		37.77.0	Nationwide Children's Hospital	TCGA-64-1678-F4371	5b51f40d-c1d0-43fe-8136-48ede23d4525	TCGA-64-1678	22	15			0		Lung Adenocarcinoma							3F397506-25DF-4BCA-9C2E-50D11E8A0517		Complete Remission/Response	No	YES							12	11	NO	20	No	M0	N0	T2b	1678		TUMOR FREE			YES
TCGA-55-8089-01A					56		213.60.0	Nationwide Children's Hospital	TCGA-55-8089-F59075	C8B09023-1E19-4E25-83B5-FB60003D08F0	TCGA-55-8089	22	30			0		Lung Adenocarcinoma	90		YES			YES	EDF23376-1B06-4228-9A8B-22201EE25817	Scheduled Follow-up Submission	Complete Remission/Response	No	YES		YES	NO		Peripheral Lung	NO	12	4	NO	97	No	M0	N0	T1a	8089		TUMOR FREE			NO
TCGA-44-6774-01A					56		144.70.0	Nationwide Children's Hospital	TCGA-44-6774-F30164	E1541BC7-F0F2-4081-85B4-DE781B1C27EC	TCGA-44-6774	22	3			0		Lung Adenocarcinoma	101	1					3F278D33-628D-436B-9444-90969023970C	Scheduled Follow-up Submission		No	YES							12	4	NO	20	No	M0	N2	T1	6774	Pre-Adjuvant Therapy	TUMOR FREE			YES
TCGA-86-7713-01A					70		183.66.0	Nationwide Children's Hospital	TCGA-86-7713-F35420	B1E72965-1FBD-4BC1-8B24-56DDA7973B73	TCGA-86-7713	22	27			0		Lung Adenocarcinoma		0					EECD151E-BF25-4409-8237-CD1F3A97F392	Scheduled Follow-up Submission	Complete Remission/Response	No	YES	100	NO			Peripheral Lung	NO	12	9	NO		No	M0	N0	T2b	7713	Post-Adjuvant Therapy	TUMOR FREE			YES
TCGA-44-8117-01A					54		213.60.0	Nationwide Children's Hospital	TCGA-44-8117-F36070	E5A2A932-540F-4F64-8A4B-0357E1C9C18B	TCGA-44-8117	22	18			0		Lung Adenocarcinoma	86	1					A9F7DDF3-58AB-4A2A-BD10-28FF1AFB942F	Scheduled Follow-up Submission	Complete Remission/Response	No	YES						NO	12	10	NO	54	No	M0	N0	T2a	8117	Post-Adjuvant Therapy	TUMOR FREE	88	65	YES
TCGA-91-6828-01A					70		144.70.0	Nationwide Children's Hospital	TCGA-91-6828-F21014	182ca854-9147-4d4e-b2aa-7b899e591214	TCGA-91-6828	22	8			0		Lung Adenocarcinoma	71	2					0DF61DC9-E38C-4780-85E3-961A2C33C556	Scheduled Follow-up Submission		No	YES		NO					12	5	NO		No	M0	N0	T1a	6828	Preoperative	TUMOR FREE			NO
TCGA-75-5126-01A	NO	NO	NO				119.76.0	Nationwide Children's Hospital	TCGA-75-5126-F11746	8ee06ba1-ac92-4ac5-9748-27ba9607d9e7	TCGA-75-5126	22	4					Lung Adenocarcinoma		1	NO			NO	C31D6464-5688-4A61-86D0-A73DCB9F7643		Progressive Disease	No	YES		NO			Peripheral Lung		12	4	YES	40	No	M0	N2	T3	5126	Adjuvant therapy	WITH TUMOR			NO
TCGA-97-7938-01A					76		196.64.0	Nationwide Children's Hospital	TCGA-97-7938-F57460	0EB1C458-4194-49CB-8BC9-D806490FF5E5	TCGA-97-7938	22	11			0		Lung Adenocarcinoma	53		YES			NO	7054F136-340B-4DBA-BE00-662CDF0C0D84	Scheduled Follow-up Submission	Complete Remission/Response	No	YES		YES	YES	G12C		NO	12	3	NO	40	No	MX	N0	T1a	7938		TUMOR FREE	59	54	NO
TCGA-MP-A4SV-01A					67		264.60.0	Nationwide Children's Hospital			TCGA-MP-A4SV	22				0		Lung Adenocarcinoma	48		NO			NO	3585B2DD-A6E8-4500-A5E6-F86FF19EEEA4			No	YES		NO					12			110	No	M0	N0	T2	A4SV				78
TCGA-S2-AA1A-01A					68		406.37.0	Nationwide Children's Hospital	TCGA-S2-AA1A-F67520	90F720D7-868B-4102-9B73-0824B7500158	TCGA-S2-AA1A	22	7			0		Lung Adenocarcinoma	65		NO			NO	8B815911-6150-4685-91D3-1F957A2D3E4B	Scheduled Follow-up Submission	Complete Remission/Response	No	YES		NO				NO	12	11	NO	95	No	M0	N0	T1b	AA1A		TUMOR FREE	83	2.16	NO
TCGA-86-8281-01A					75		222.60.0	Nationwide Children's Hospital	TCGA-86-8281-F57953	017E9B68-F25D-49A5-B8E0-DB66626379F3	TCGA-86-8281	22	21			0		Lung Adenocarcinoma							7AB1B446-FC00-4E0F-A4EB-42809A344B6B	Scheduled Follow-up Submission		No	YES		NO			Peripheral Lung	YES	12	4		30	No	M0	NX	T1	8281
TCGA-86-A4JF-01A	YES			NO	56		264.60.0	Nationwide Children's Hospital	TCGA-86-A4JF-F51505	D96618EB-06F6-47F9-8C4C-D1E3264691D1	TCGA-86-A4JF	22	6			0	436	Lung Adenocarcinoma		2	NO			NO	9C079A14-7CFA-4C93-98D7-5174195C0FEB	Scheduled Follow-up Submission	Progressive Disease	No	YES	70	NO			Central Lung	NO	12	12	YES		No	M0	N0	T3	A4JF	Post-Adjuvant Therapy	WITH TUMOR			YES
TCGA-44-A47G-01A					73		258.59.0	Nationwide Children's Hospital	TCGA-44-A47G-F49023	B45EC546-C7BD-426B-B7AE-16F5FF6A1559	TCGA-44-A47G	22	25			0		Lung Adenocarcinoma	85		NO			NO	5579A831-B229-411F-9569-C52CFB441C4D	Scheduled Follow-up Submission	Complete Remission/Response	No	YES		NO				NO	12	9	NO	28	No	M0	N0	T1	A47G		TUMOR FREE			NO
TCGA-67-3774-01A					73		37.77.0	Nationwide Children's Hospital			TCGA-67-3774	22				0		Lung Adenocarcinoma			NO			NO	3CF64AC8-5C8A-43E9-8283-ECF05730CA8B			No	YES		NO					12				No	M0	N0	T2	3774
TCGA-86-8073-01A					58		213.60.0	Nationwide Children's Hospital	TCGA-86-8073-F66082	FD02835A-886E-4E52-B3D1-53DCF8D4BB81	TCGA-86-8073	22	2			0		Lung Adenocarcinoma		0	NO			NO	B4587182-0E30-4606-8F54-AE1CDCB85B64	Scheduled Follow-up Submission	Complete Remission/Response	No	YES	100	NO			Peripheral Lung	NO	12	10	NO	40	No	M0	N0	T2a	8073	Other	TUMOR FREE			NO
TCGA-75-6206-01A							119.76.0	Nationwide Children's Hospital	TCGA-75-6206-F15085	9fa30583-7256-4ed8-93ac-9cf0f6a928c0	TCGA-75-6206	22	21					Lung Adenocarcinoma		0					1522B95A-6D73-4947-85B5-A32BBFE30909		Complete Remission/Response	No	YES					Peripheral Lung		12	7	NO	20	No	M0	N0	T2	6206	Adjuvant therapy	TUMOR FREE			NO
TCGA-78-7540-01A					66		183.66.0	Nationwide Children's Hospital	TCGA-78-7540-F20484	ff5b85d0-1d1f-4e04-865e-c2f897aa5866	TCGA-78-7540	22	19			0		Lung Adenocarcinoma			NO			NO	C361CE0B-9E38-45C8-8490-5731E7112A4B	Scheduled Follow-up Submission		No	YES		NO					12	1			No	M0	N0	T2	7540					NO
TCGA-86-8669-01A	YES	NO		NO	64		238.60.0	Nationwide Children's Hospital	TCGA-86-8669-F66085	60AC3AE9-E893-49D1-A1C0-47BEAE953467	TCGA-86-8669	22	15			0	849	Lung Adenocarcinoma							41632C11-56C4-45D0-8920-4C790D75C863	Scheduled Follow-up Submission	Complete Remission/Response	No	YES		NO			Peripheral Lung	NO	12	10	YES	47	No	M0	N0	T1b	8669		TUMOR FREE			NO
TCGA-75-7025-01A							160.69.0	Nationwide Children's Hospital	TCGA-75-7025-F15874	68cda392-87e8-466a-9dc5-e7f00f2cb0ba	TCGA-75-7025	22	11					Lung Adenocarcinoma							57ACD023-3890-400B-8CA7-73DF286B0E89			No	YES					Peripheral Lung		12	8	NO		No	M0	N0	T2	7025		TUMOR FREE			NO
TCGA-97-A4M1-01A					52		264.60.0	Nationwide Children's Hospital	TCGA-97-A4M1-F57386	4503E4C1-A9BE-4125-9311-A8140E6486AF	TCGA-97-A4M1	22	10			0		Lung Adenocarcinoma	111	0	NO			NO	51BCC247-879C-4DD0-A46F-B0726900C455	Scheduled Follow-up Submission	Complete Remission/Response	No	YES		NO				NO	12	3	NO	3	No	M0	N0	T1a	A4M1	Other	TUMOR FREE	92	105	NO
TCGA-55-6986-01A					74		160.69.0	Nationwide Children's Hospital	TCGA-55-6986-F45606	D147F3D1-27F0-467E-9212-AE14BCF08700	TCGA-55-6986	22	17			0		Lung Adenocarcinoma			NO			NO	C4ABA8E0-DBA8-4889-873E-83C519EA6240	Scheduled Follow-up Submission	Complete Remission/Response	No	YES		NO				NO	12	7	NO		No	M0	N0	T2	6986		TUMOR FREE			NO
TCGA-78-7166-01A	NO	NO			84		183.66.0	Nationwide Children's Hospital	TCGA-78-7166-F16954	91193834-639f-45c9-9c1b-79a5c5c33f76	TCGA-78-7166	22	28			0		Lung Adenocarcinoma			NO			NO	5B98F4C1-0200-4EF9-8872-00C7E00A1795	Scheduled Follow-up Submission		No	YES		NO			Central Lung		12	9	NO	38	Yes	M0	N1	T2	7166					NO
TCGA-91-6831-01A					66		144.70.0	Nationwide Children's Hospital	TCGA-91-6831-F32636	05ae61a2-c054-4273-b50c-4760cbb08a73	TCGA-91-6831	22	5			0		Lung Adenocarcinoma							B9F32319-9014-468C-B139-FEB526351B29	Scheduled Follow-up Submission	Complete Remission/Response	No	YES		NO				YES	12	6	NO		No	MX	N0	T2	6831		TUMOR FREE			NO
TCGA-69-8253-01A					59		222.60.0	Nationwide Children's Hospital	TCGA-69-8253-F41949	909F53FB-3A49-456C-9593-B6B043711B7B	TCGA-69-8253	22	5			0		Lung Adenocarcinoma		1	NO			NO	1F3BEBBD-F509-4A8C-BC7E-EF8D464ECAFF	Scheduled Follow-up Submission	Complete Remission/Response	No	YES		NO				NO	12	4	NO	7.8	No	MX	N1	T1a	8253	Preoperative	TUMOR FREE			YES
TCGA-38-6178-01A					70		119.76.0	Nationwide Children's Hospital	TCGA-38-6178-F22078	e24c953c-286d-4f97-a3ac-9c2723bd1f76	TCGA-38-6178	22	23			0		Lung Adenocarcinoma			YES	Exon 19 Deletion		NO	DEE9BBE3-256B-4030-881C-55DE129030F5	Scheduled Follow-up Submission		No	YES		YES	NO		Central Lung		12	2	NO		Yes		N2	T2b	6178		WITH TUMOR			YES
TCGA-44-6148-01A					60		119.76.0	Nationwide Children's Hospital	TCGA-44-6148-F20979	0588d138-a508-4c15-80e2-1703a91ce323	TCGA-44-6148	22	25			0		Lung Adenocarcinoma							AC688301-57A6-4898-AE88-30EA1B632E3D	Scheduled Follow-up Submission	Complete Remission/Response	No	YES		NO	NO				12	1	NO	60	No	M0	N0	T1b	6148		TUMOR FREE	110	77	NO
TCGA-93-A4JP-01A	YES	YES		NO	64		264.60.0	Nationwide Children's Hospital	TCGA-93-A4JP-F56970	ED886C70-F6A0-43DD-8B8D-D9182B3D1DC2	TCGA-93-A4JP	22	28			0	497	Lung Adenocarcinoma		1	YES	L861Q		NO	C666DEA5-1B56-4F43-93FB-425FC38E44B7	Scheduled Follow-up Submission	Progressive Disease	No	YES		NO				NO	12	2	YES		No	M1b	NX	TX	A4JP	Post-Adjuvant Therapy	WITH TUMOR			YES
TCGA-86-8673-01A					61		238.60.0	Nationwide Children's Hospital	TCGA-86-8673-F41842	4D099A3E-8646-424C-AEF4-394D2DDC653A	TCGA-86-8673	22	1			0		Lung Adenocarcinoma							24F9F165-1D16-4E6C-90F0-028766B0499C	Scheduled Follow-up Submission	Complete Remission/Response	No	YES						NO	12	4	NO	54	No	M0	N0	T2	8673		TUMOR FREE			NO
TCGA-73-4659-01A	YES	YES	NO		66		58.77.0	Nationwide Children's Hospital	TCGA-73-4659-F12416	f2d5e4ac-03fa-459f-b244-372e45af7556	TCGA-73-4659	22	3			0	35	Lung Adenocarcinoma			NO			NO	782B5727-5D2E-4D34-A936-60A749F48712		Progressive Disease	No	YES	0	NO			Central Lung		12	12	YES	12	No	M0	N2	T2	4659	Other	WITH TUMOR			NO
TCGA-44-5644-01A					51		166.67.0	Nationwide Children's Hospital	TCGA-44-5644-F17419	002c588c-531f-435b-98a5-bcd8255fb0c1	TCGA-44-5644	22	12			0		Lung Adenocarcinoma	61						C3A6C51C-4B3A-478E-AFCE-16BB3A02759D	Scheduled Follow-up Submission	Complete Remission/Response	No	YES							12	10	NO	17.5	No		N0	T2a	5644		TUMOR FREE			NO
TCGA-05-4382-01A		YES			68		58.77.0	Nationwide Children's Hospital	TCGA-05-4382-F36329	A8CCFEBD-82AA-41E1-85E0-75E97DEA2051	TCGA-05-4382	22	29			0	334	Lung Adenocarcinoma							F51979A3-5925-4EFD-B705-E1776FAA69B3	Scheduled Follow-up Submission	Complete Remission/Response	No	YES						NO	12	10	YES	62	Yes	M0	N0	T2	4382		TUMOR FREE			NO
TCGA-MP-A4T9-01A	YES	YES		YES	54		264.60.0	Nationwide Children's Hospital	TCGA-MP-A4T9-F41355	714B05C6-BB16-44AD-8A30-BA165B380950	TCGA-MP-A4T9	22	15		938	0	418	Lung Adenocarcinoma	106		NO			NO	684955CA-3EBB-49DA-8131-776BD7E707C9	Additional New Tumor Event	Progressive Disease	No	YES		NO				NO	12	3	YES	24	No	MX	N2	T2	A4T9		WITH TUMOR		105	YES
TCGA-75-7027-01A							160.69.0	Nationwide Children's Hospital	TCGA-75-7027-F15876	65d0b206-5ccc-4f50-97a2-027970e57dc5	TCGA-75-7027	22	12					Lung Adenocarcinoma		0					B537DF8B-643B-4F2A-A855-FBF55D6C9E19			No	YES					Peripheral Lung		12	8	NO	50	No	M0	N0	T2	7027					NO
TCGA-73-4668-01A	YES	NO	NO	NO	66		58.77.0	Nationwide Children's Hospital	TCGA-73-4668-F7955	c82cb3f9-fb87-4f7f-80c0-9ec28a8368c0	TCGA-73-4668	22	6			0	236	Lung Adenocarcinoma		0	NO			NO	1EDE61AC-0C23-422E-B2E1-D5090C0D916B			No	YES	90	NO			Peripheral Lung		12	1	YES	55	No	M0	N1	T2	4668	Post-Adjuvant Therapy	WITH TUMOR			YES
TCGA-05-4415-01A					57		144.70.0	Nationwide Children's Hospital	TCGA-05-4415-F36499	415D000D-5528-4214-A231-C7F0A9AA1535	TCGA-05-4415	22	31			0	60	Lung Adenocarcinoma							788996A5-0DC9-47F3-99C9-E79AA1BBFA2A	Scheduled Follow-up Submission	Progressive Disease	No	YES						NO	12	10	YES	29	No	M0	N2	T4	4415		WITH TUMOR			NO
TCGA-05-4395-01A					76		58.77.0	Nationwide Children's Hospital			TCGA-05-4395	22				0		Lung Adenocarcinoma							64FC31AE-AAAA-4984-BF5A-6BE8589B598B			No	YES							12				No	M0	N2	T4	4395
TCGA-97-7552-01A	NO	NO			70		166.67.0	Nationwide Children's Hospital	TCGA-97-7552-F18844	3e54d908-6857-428c-9f5c-f1832e592ace	TCGA-97-7552	22	28			0	798	Lung Adenocarcinoma							62F396EA-921F-4C00-9DC6-ED35EB674AFA	Additional New Tumor Event	Complete Remission/Response	No	YES							12	11	YES	40	No	MX	N0	T2	7552		TUMOR FREE			NO
TCGA-50-6593-01A	NO	NO		NO	49		119.76.0	Nationwide Children's Hospital	TCGA-50-6593-F43840	BB824133-F8BB-4916-968D-86355FA69BA7	TCGA-50-6593	22	13			0	266	Lung Adenocarcinoma			YES			YES	2B60B97C-D675-413D-A8D6-8AE2D426F959	Scheduled Follow-up Submission	Progressive Disease	No	YES		YES	NO			NO	12	6	YES		No	M0	N2	T1	6593		WITH TUMOR			NO
TCGA-44-2655-01A	NO	NO	NO	NO	65		37.77.0	Nationwide Children's Hospital	TCGA-44-2655-F5293	42f22d9e-2d8f-4b1f-81e7-29eca0f4fed2	TCGA-44-2655	22	8			0		Lung Adenocarcinoma	73						C8651EDC-3160-414E-993D-FC0C112E708E		Complete Remission/Response	No	YES		NO					12	10	NO	30	Yes	M0	N0	T1	2655		TUMOR FREE			NO
TCGA-50-5049-01A	NO	NO		NO	70		84.73.0	Nationwide Children's Hospital	TCGA-50-5049-F32017	79588753-1945-43ea-8245-803ff0d345a2	TCGA-50-5049	22	15	1520		0	1568	Lung Adenocarcinoma			YES				B6A9D037-038E-4098-9AE8-DB9E4FA65E15	Scheduled Follow-up Submission	Stable Disease	No	YES		YES	NO			NO	12	5	YES		No	M0	N0	T2	5049		WITH TUMOR			NO
TCGA-49-AAR2-01A					64		406.37.0	Nationwide Children's Hospital	TCGA-49-AAR2-F72094	BC671272-CB8C-48B0-9CA4-7408D1BE13D6	TCGA-49-AAR2	22	10			0		Lung Adenocarcinoma	105.8	1					FB8681B0-F866-4CDC-A266-4721D47E1E33	Scheduled Follow-up Submission	Complete Remission/Response	No	YES	90					NO	12	4	NO		No	MX	N0	T2	AAR2	Preoperative	TUMOR FREE	78.2	79.5	YES
TCGA-50-5946-01A	YES	YES	NO	YES	62		119.76.0	Nationwide Children's Hospital	TCGA-50-5946-F32143	28fbb9d8-ddc3-44a6-9f34-2ee25dbe35c3	TCGA-50-5946	22	17		221	0	221	Lung Adenocarcinoma							99CF2C04-60DF-42B2-8C25-D5E4D1122F1C	Scheduled Follow-up Submission	Progressive Disease	No	YES						NO	12	5	YES		No	MX	N0	T1	5946		WITH TUMOR			NO
TCGA-55-7727-01A					70		196.64.0	Nationwide Children's Hospital	TCGA-55-7727-F66030	DF6E56D7-6870-4C45-8AC3-8D2CECB26497	TCGA-55-7727	22	1			0		Lung Adenocarcinoma	86						52D65E1F-16F5-42BB-AA48-08B0E69E3DCC	Scheduled Follow-up Submission	Complete Remission/Response	No	YES						YES	12	10	NO		No	MX	N2	T1a	7727		TUMOR FREE	48	73	YES
TCGA-55-A494-01A					61		264.60.0	Nationwide Children's Hospital	TCGA-55-A494-F59038	C756AD9D-B853-4622-A840-F6365F418A50	TCGA-55-A494	22	30			0		Lung Adenocarcinoma	76		YES		FISH	YES	9572E670-4D15-40AC-9740-07F6D2FE5120	Scheduled Follow-up Submission	Complete Remission/Response	No	YES		YES	YES	G12D	Peripheral Lung	NO	12	4	NO	7	No	MX	N0	T2a	A494		TUMOR FREE			NO
TCGA-44-7671-01A					64		183.66.0	Nationwide Children's Hospital	TCGA-44-7671-F20565	ca842d9f-9ec6-407c-85fa-3d6557381f6b	TCGA-44-7671	22	17			0		Lung Adenocarcinoma	65						865E90D2-E652-4819-95A9-828D45D42691	Scheduled Follow-up Submission	Complete Remission/Response	No	YES							12	1	NO		Yes	M0	N0	T2a	7671		TUMOR FREE	103	82	NO
TCGA-99-8028-01A					50		213.60.0	Nationwide Children's Hospital	TCGA-99-8028-F57699	ADD85632-529E-47C6-BEDA-7857D1A5C780	TCGA-99-8028	22	17			0		Lung Adenocarcinoma	71		YES		RT-PCR	YES	4995C3BF-6032-4C16-98E3-808B3392C7EF	Scheduled Follow-up Submission	Complete Remission/Response	No	YES		YES	YES	G12C		NO	12	4	NO	30	No	M0	N0	T1a	8028		TUMOR FREE	91	98	NO
TCGA-55-5899-01A					58		84.73.0	Nationwide Children's Hospital	TCGA-55-5899-F43194	2C5BA987-9730-46DB-B69A-829E5803E4EF	TCGA-55-5899	22	15			0		Lung Adenocarcinoma		0					4AA8C7AB-F2A2-4CA1-A17D-1EB02EA38D85	Scheduled Follow-up Submission	Complete Remission/Response	No	YES	100					NO	12	5	NO		No	M0	N1	T1a	5899	Post-Adjuvant Therapy	TUMOR FREE			YES
TCGA-97-A4M5-01A					83		264.60.0	Nationwide Children's Hospital	TCGA-97-A4M5-F57443	45F6F53F-E17E-47FD-A616-202C86D48D1F	TCGA-97-A4M5	22	12			0		Lung Adenocarcinoma	51		NO			NO	87E54EB1-C7A8-4C7D-A38E-217F50D57069	Scheduled Follow-up Submission	Complete Remission/Response	No	YES		YES	YES	G12C		NO	12	3	NO	6	No	M0	N0	T1b	A4M5		TUMOR FREE	84	94	NO
TCGA-78-7537-01A					72		183.66.0	Nationwide Children's Hospital	TCGA-78-7537-F20455	6c5bda4d-e611-4338-b11b-ff753eac94d6	TCGA-78-7537	22	13			0		Lung Adenocarcinoma			NO			NO	2760A8D1-5BB1-4DD1-AB61-609CAAD1A661	Scheduled Follow-up Submission		No	YES		NO					12	1		20	No	M0	N0	T2	7537					NO
TCGA-MP-A4T8-01A					68		264.60.0	Nationwide Children's Hospital			TCGA-MP-A4T8	22				0		Lung Adenocarcinoma	102		NO			NO	26388FBE-3144-4DFD-B7FA-6DC09242C48E			No	YES		NO					12			25	Yes, History of Prior Malignancy	M0	N2	T2	A4T8				72
TCGA-75-5125-01A							119.76.0	Nationwide Children's Hospital	TCGA-75-5125-F11748	406f25c2-f2f7-4aa9-9016-034a5798f561	TCGA-75-5125	22	31					Lung Adenocarcinoma			NO			NO	0EFC5A8A-361A-4F03-8772-0316DF2EE851		Complete Remission/Response	No	YES		NO			Peripheral Lung		12	3	NO	25	No	M0	N1	T2	5125	Adjuvant therapy	TUMOR FREE			NO
TCGA-55-8207-01A					73		213.60.0	Nationwide Children's Hospital	TCGA-55-8207-F65849	29690F66-8E25-4910-9609-41662B16E775	TCGA-55-8207	22	30			0		Lung Adenocarcinoma	48						DD89154B-4066-4936-8A56-D703B92679BD	Scheduled Follow-up Submission	Complete Remission/Response	No	YES						NO	12	9	NO		Yes, History of Synchronous/Bilateral Malignancy	MX	N0	T2a	8207		TUMOR FREE	84	83	NO
TCGA-MN-A4N5-01A					63		264.60.0	Nationwide Children's Hospital	TCGA-MN-A4N5-F56665	7484D5CB-5D52-4177-9FF8-CC427340FC45	TCGA-MN-A4N5	22	17			0		Lung Adenocarcinoma	82		YES		IHC	YES	F02DED14-BC8F-4827-A306-739C68BDC301	Scheduled Follow-up Submission		No	YES		NO				YES	12	2	NO		No	M0	N0	T1a	A4N5		TUMOR FREE			NO
TCGA-44-A47A-01A	NO	NO	NO	NO	78		258.59.0	Nationwide Children's Hospital	TCGA-44-A47A-F46608	F1D65C08-A2C8-432A-B4A0-AB16EC44BC2B	TCGA-44-A47A	22	12			0	400	Lung Adenocarcinoma			NO			NO	7A164DD2-ABCC-4A08-86B6-53D995AF5C87	Additional New Tumor Event	Progressive Disease	No	YES		NO				NO	12	8	YES	80	No	MX	N0	T2a	A47A		WITH TUMOR			NO
TCGA-97-8172-01A					75		222.60.0	Nationwide Children's Hospital	TCGA-97-8172-F44230	52560AC4-46A3-4DEC-8DD6-A80E5C3A6658	TCGA-97-8172	22	19			0		Lung Adenocarcinoma	64.98		YES			NO	E47AC7F0-7ADA-430D-A718-6950B7792E78	Scheduled Follow-up Submission	Complete Remission/Response	No	YES		YES	YES	G12V		NO	12	6	NO	20	Yes, History of Prior Malignancy	M0	N0	T2a	8172		TUMOR FREE	105.1	107.25	NO
TCGA-97-8547-01A					78		238.60.0	Nationwide Children's Hospital	TCGA-97-8547-F49559	C213E7BE-D60E-412A-BD5D-8BCFC8749CA7	TCGA-97-8547	22	3			0		Lung Adenocarcinoma	87		YES	Exon 19 Deletion		NO	48294870-1282-4FDF-B985-9FE2CD14A7FB	Scheduled Follow-up Submission	Complete Remission/Response	No	YES		YES	NO			NO	12	10	NO		No	MX	N2	T2a	8547		TUMOR FREE			YES
TCGA-49-AAQV-01A					63		406.37.0	Nationwide Children's Hospital			TCGA-49-AAQV	22				0		Lung Adenocarcinoma	95.5		YES	Exon 19 Deletion	FISH	YES	E5BDA816-5C43-4167-AD60-9154EC20E833			No	YES							12				No	MX	N1	T1	AAQV			77.29	81.7
TCGA-95-7043-01A					63		160.69.0	Nationwide Children's Hospital	TCGA-95-7043-F15630	436c5e80-a001-43df-9fa0-09e27e2b6b94	TCGA-95-7043	22				0		Lung Adenocarcinoma							C3FB6151-9134-4BB0-95AB-8DB7839466E0	Scheduled Follow-up Submission	Complete Remission/Response	No	YES							12	8	NO	40	Yes	MX	N0	T1a	7043		TUMOR FREE			YES
TCGA-49-4488-01A	NO	YES			74		119.76.0	Nationwide Children's Hospital	TCGA-49-4488-F14699	0e28bc4e-7453-4d8a-a604-dafc492ada64	TCGA-49-4488	22	9		690	0	634	Lung Adenocarcinoma							ACF6C94F-687E-4A83-9A3E-672A6B798E4B	Scheduled Follow-up Submission		No	YES							12	8	YES		No	MX	N0	T1	4488					NO
TCGA-73-4675-01A					59		58.77.0	Nationwide Children's Hospital	TCGA-73-4675-F8551	05da2e27-6b81-4a1f-887c-1a42d8bc1786	TCGA-73-4675	22	7			0		Lung Adenocarcinoma	69	0	NO			NO	AE7E2ACE-CD7D-43E8-A55A-33257194F446			No	YES		NO			Peripheral Lung		12	1		41	No	M0	N1	T3	4675	Pre-Adjuvant Therapy	TUMOR FREE
TCGA-86-8359-01A					52		232.55.0	Nationwide Children's Hospital	TCGA-86-8359-F43296	5A4B847F-5627-4BA7-86C0-99956A979DE4	TCGA-86-8359	22	16			0		Lung Adenocarcinoma		4					95E756F4-FFA1-49AE-B2B9-C4E5B28B236C	Scheduled Follow-up Submission		No	YES	20				Peripheral Lung	NO	12	5		36	No	M0	N2	T3	8359	Post-Adjuvant Therapy
TCGA-49-AARR-01A	NO	NO	NO		68		423.36.0	Nationwide Children's Hospital	TCGA-49-AARR-F70574	A41DDC21-E254-43A4-BBC7-FE6D974EB739	TCGA-49-AARR	22	25			0	4812	Lung Adenocarcinoma	103.5	1					1A6E22AC-6B2F-458D-A43F-8DFC1126466A	Scheduled Follow-up Submission	Stable Disease	No	YES	80					NO	12	2	YES		No	MX	N0	T1	AARR	Preoperative	WITH TUMOR	76.3	78.8	NO
TCGA-50-5933-01A					72		119.76.0	Nationwide Children's Hospital	TCGA-50-5933-F32104	ceeea662-3e16-4daf-bcf0-50f8d50e75ea	TCGA-50-5933	22	17			0		Lung Adenocarcinoma							7419B949-44DB-476E-9C1B-9FAF9E058D9B	Scheduled Follow-up Submission	Complete Remission/Response	No	YES					Central Lung	NO	12	5	NO		No	M0	N2	T4	5933		TUMOR FREE			YES
TCGA-86-7954-01A					68		204.62.0	Nationwide Children's Hospital	TCGA-86-7954-F57948	F5479210-0898-47AC-989D-AD4BEE57AA48	TCGA-86-7954	22	28			0		Lung Adenocarcinoma		0	NO				5DFE37F0-86D8-4DFF-BFB4-6BEF743F2F73	Scheduled Follow-up Submission	Complete Remission/Response	No	YES	100	NO			Peripheral Lung	NO	12	3	NO	8	No	M0	N0	T2	7954	Post-Adjuvant Therapy	TUMOR FREE			YES
TCGA-86-A4P7-01A					63		264.60.0	Nationwide Children's Hospital	TCGA-86-A4P7-F66092	575B0BCF-4A4C-489E-9FD7-5CF28FBD3A68	TCGA-86-A4P7	22	2			0		Lung Adenocarcinoma		0	NO			NO	7B4F2FAA-1B9E-45DA-A0D8-353CFA82FFAD	Scheduled Follow-up Submission	Complete Remission/Response	No	YES	100	NO			Peripheral Lung	NO	12	10	NO		No	M0	N0	T2a	A4P7	Other	TUMOR FREE			NO
TCGA-95-7944-01A					71		204.62.0	Nationwide Children's Hospital	TCGA-95-7944-F29525	747C761B-CB03-4D90-A93D-6C327834296D	TCGA-95-7944	22	21			0		Lung Adenocarcinoma	60						657EE798-DA93-45FE-B423-A54E0D6E41FC	Scheduled Follow-up Submission		No	YES							12	3	NO	50	No	M0	N0	T1a	7944				87	NO
TCGA-86-6562-01A	NO	NO	NO		52		119.76.0	Nationwide Children's Hospital	TCGA-86-6562-F29765	a47bbc7f-a0b3-4a1f-bf61-b6fd5f425572	TCGA-86-6562	22	28			0	274	Lung Adenocarcinoma							B3448EDC-9C12-47C5-9DE4-F2E3371983D8	Scheduled Follow-up Submission	Progressive Disease	No	YES	0	NO			Central Lung		12	3	YES		No	M0	N1	T2a	6562		WITH TUMOR			YES
TCGA-50-8459-01A	NO	NO	YES		68		232.55.0	Nationwide Children's Hospital	TCGA-50-8459-F69334	9A74D1CF-D426-4C2E-AF2F-25F0C20A6705	TCGA-50-8459	22	5	432		0	432	Lung Adenocarcinoma	70		YES				09894007-32CD-4611-A702-82DD5D97656A	Scheduled Follow-up Submission	Progressive Disease	No	YES		YES	YES	G12C		NO	12	1	YES	10	No	M0	N0	T3	8459		WITH TUMOR			YES
TCGA-55-6970-01A	NO	NO	NO		67		160.69.0	Nationwide Children's Hospital	TCGA-55-6970-F57904	CBF3A7D1-584C-4CCD-B4DE-B8AB2DABFD79	TCGA-55-6970	22	28			0	457	Lung Adenocarcinoma			NO			NO	85CBF41C-C92A-49CE-8209-F6D1A682227E	Scheduled Follow-up Submission	Progressive Disease	No	YES		NO				NO	12	3	YES		No	MX	N2	T2	6970		WITH TUMOR			YES
TCGA-78-8660-01A					69		238.60.0	Nationwide Children's Hospital			TCGA-78-8660	22				0		Lung Adenocarcinoma	87		NO			NO	BF10C5DD-700A-4BED-9FC7-D988D0DE09D6			No	YES		NO			Peripheral Lung		12			11	Yes, History of Prior Malignancy	M0	N1	T2	8660
TCGA-05-4410-01A					62		144.70.0	Nationwide Children's Hospital			TCGA-05-4410	22				0		Lung Adenocarcinoma							FA353F99-9681-402F-9AAA-3DF6BD77627C			No	YES							12			98	Yes	M0	N0	T2	4410
TCGA-05-4424-01A		YES			70		144.70.0	Nationwide Children's Hospital	TCGA-05-4424-F36536	97188E69-9925-4A74-B986-E22FD997CD52	TCGA-05-4424	22	1			0	153	Lung Adenocarcinoma							031E2E0A-A459-47A7-9207-E49708D793BE	Scheduled Follow-up Submission	Partial Remission/Response	No	YES						NO	12	11	YES	50	No	M0	N0	T3	4424		WITH TUMOR			YES
TCGA-05-4402-01A					57		58.77.0	Nationwide Children's Hospital	TCGA-05-4402-F36466	DFAF4F5D-D945-4D17-8F16-6BFB6E538D7A	TCGA-05-4402	22	31			0		Lung Adenocarcinoma							1373B0C9-ABFA-4184-B18D-B75EB894BDE2	Scheduled Follow-up Submission	Complete Remission/Response	No	YES						NO	12	10	NO		Yes	M1	NX	T2	4402		TUMOR FREE			YES
TCGA-55-8302-01A					54		232.55.0	Nationwide Children's Hospital	TCGA-55-8302-F56188	D21EFBC3-C259-4902-A3EB-2E4DD065185A	TCGA-55-8302	22	29			0		Lung Adenocarcinoma							F77E891C-2CB3-4496-8EDF-622FCD03BB94	Scheduled Follow-up Submission	Complete Remission/Response	No	YES						NO	12	1	NO	59	No	MX	N0	T2	8302		TUMOR FREE			NO
TCGA-05-4432-01A					66		58.77.0	Nationwide Children's Hospital	TCGA-05-4432-F36424	2D609D44-E554-4B5E-AB4C-FA32A56E80D9	TCGA-05-4432	22	30			0		Lung Adenocarcinoma							B270ECCD-4711-4AB4-93DF-E03FDE374F63	Scheduled Follow-up Submission	Complete Remission/Response	No	YES						NO	12	10	NO	58	No	M0	N1	T2	4432		TUMOR FREE			YES
TCGA-50-5068-01A	YES	NO	YES	NO	59		84.73.0	Nationwide Children's Hospital	TCGA-50-5068-F32057	271667fa-b39c-433f-a7d7-f65d87b30992	TCGA-50-5068	22	16	686		0	686	Lung Adenocarcinoma							BBCD12CE-E298-4392-BA8D-8FA7D6234E6B	Scheduled Follow-up Submission	Progressive Disease	No	YES						NO	12	5	YES		No	MX	N1	T2	5068		WITH TUMOR			YES
TCGA-55-6983-01A					81		160.69.0	Nationwide Children's Hospital	TCGA-55-6983-F47805	1E012012-FC2E-4B87-A8A8-30017E10F92D	TCGA-55-6983	22	28			0		Lung Adenocarcinoma			NO			NO	5E2B5428-5A25-41F1-BBE5-534D444494CE	Scheduled Follow-up Submission	Complete Remission/Response	No	YES		NO				NO	12	8	NO	60	No	M0	N1	T2	6983		TUMOR FREE			YES
TCGA-49-AAR9-01A					61	ALL 3 LOBES OF RT LUNG	423.36.0	Nationwide Children's Hospital			TCGA-49-AAR9	22				0		Lung Adenocarcinoma							D4FE6498-CCE0-4A25-964E-2F1E778071A9			No	YES							12				No	MX	N0	T3	AAR9
TCGA-05-4398-01A					47		58.77.0	Nationwide Children's Hospital	TCGA-05-4398-F36462	F7EFBD0A-009C-48EE-B6F6-B67D4F976432	TCGA-05-4398	22	31			0		Lung Adenocarcinoma							FEF30350-2263-493C-80DC-F12D5617BBD4	Scheduled Follow-up Submission	Complete Remission/Response	No	YES						NO	12	10	NO	72	No	M0	N3	T4	4398		TUMOR FREE			YES
TCGA-44-7659-01A					70		183.66.0	Nationwide Children's Hospital	TCGA-44-7659-F30936	2f3b8b99-565e-4ad3-a8f0-edc89b22bd70	TCGA-44-7659	22	19			0		Lung Adenocarcinoma	43						1215F5A6-7262-455E-8E99-A7C29C0D9619	Scheduled Follow-up Submission		No	YES		NO					12	4	NO	40	No	MX	N0	T1b	7659		TUMOR FREE	60	47
TCGA-83-5908-01A	NO	NO	NO	NO	59		84.73.0	Nationwide Children's Hospital	TCGA-83-5908-F12196	144eec6d-ffea-424d-be87-9284d029b02c	TCGA-83-5908	22	25			0		Lung Adenocarcinoma		1	NO			NO	6CF7DC17-C5D0-4B7C-AB28-4EEB203B9886		Stable Disease	No	YES	90	NO					12	5	NO	69	No	M0	N0	T1	5908	Other	TUMOR FREE			NO
TCGA-64-5815-01A					74		84.73.0	Nationwide Children's Hospital	TCGA-64-5815-F11425	a63ab9cf-8d93-4b05-b5e0-1134350e3251	TCGA-64-5815	22	2			0		Lung Adenocarcinoma	87		YES				F2C017DE-3777-46A3-A88B-FD9417B2064A		Complete Remission/Response	No	YES		YES			Central Lung		12	5	NO	30	No	M0	N1	T2	5815		TUMOR FREE			YES
TCGA-55-8203-01A					69		213.60.0	Nationwide Children's Hospital	TCGA-55-8203-F47819	C9045FA4-F6A7-401C-8BB1-2A97C88D9330	TCGA-55-8203	22	28			0		Lung Adenocarcinoma	39		NO			NO	3EC89E68-45BD-442F-B123-084C3BAC0903	Scheduled Follow-up Submission	Complete Remission/Response	No	YES		NO				NO	12	8	NO	50	Yes, History of Prior Malignancy	M0	N0	T1b	8203		TUMOR FREE	50	48	NO
TCGA-50-6592-01A					71		119.76.0	Nationwide Children's Hospital	TCGA-50-6592-F43835	BCFF54CF-3536-4F06-99D9-8C54307CBEFF	TCGA-50-6592	22	4			0		Lung Adenocarcinoma							9DAFFDE3-2100-472D-9A16-1863DBB35D10	Scheduled Follow-up Submission	Progressive Disease	No	YES						NO	12	6	NO		No	M0	N0	T2	6592		WITH TUMOR			NO
TCGA-55-8615-01A	YES	YES	NO	NO	67		238.60.0	Nationwide Children's Hospital	TCGA-55-8615-F56254	A2AF20F3-F8C6-4A5A-9E03-9E9583D59194	TCGA-55-8615	22	30			0	224	Lung Adenocarcinoma	83						EBFEEF38-5843-4548-8599-A460612705BA	Scheduled Follow-up Submission	Progressive Disease	No	YES						NO	12	1	YES	67	No	MX	N2	T3	8615		WITH TUMOR			YES
TCGA-91-A4BD-01A					78		258.59.0	Nationwide Children's Hospital	TCGA-91-A4BD-F58335	13A3B033-52C9-4C1F-B2FB-196BBE0A75D9	TCGA-91-A4BD	22	7			0		Lung Adenocarcinoma	94		NO				F80BEC93-0814-4246-A9BF-649411DDFD05	Scheduled Follow-up Submission	Complete Remission/Response	No	YES		NO				NO	12	4	NO		No	MX	N1	T1b	A4BD		TUMOR FREE	70	92	NO
TCGA-MP-A4SY-01A					61		264.60.0	Nationwide Children's Hospital			TCGA-MP-A4SY	22				0		Lung Adenocarcinoma	73		NO			NO	D08FE340-F375-4B56-A6A7-0975C10E7171			No	YES		NO			Central Lung		12			40	No	M0	N1	T2	A4SY				74
TCGA-50-6594-01A	NO	YES		NO	79		119.76.0	Nationwide Children's Hospital	TCGA-50-6594-F44032	08A5B385-FE6B-4B2C-8BAF-CB57CE32AA51	TCGA-50-6594	22	13			0	285	Lung Adenocarcinoma						YES	2A64D04D-AFC5-48CF-B6E0-9E19453A1F54	Scheduled Follow-up Submission	Progressive Disease	No	YES			NO			NO	12	6	YES		No	M0	N2	T3	6594		WITH TUMOR			NO
TCGA-MP-A4TJ-01A					62		278.56.0	Nationwide Children's Hospital			TCGA-MP-A4TJ	22				0		Lung Adenocarcinoma	29		NO			NO	4AAD580F-1D05-4C9C-B1BA-DD4214F7FFC8			No	YES		NO			Central Lung		12				No	M0	N0	T1	A4TJ			30.1	36
TCGA-75-7030-01A	NO	NO	NO	NO			160.69.0	Nationwide Children's Hospital	TCGA-75-7030-F15878	63eba997-c2ac-44fa-8c2b-d620644e2410	TCGA-75-7030	22	16					Lung Adenocarcinoma		0					73C73D62-90B8-4321-9242-A6FF6056A5D0		Complete Remission/Response	No	YES					Peripheral Lung		12	8	NO		No	M0	N0	T3	7030	Post-Adjuvant Therapy				YES
TCGA-44-7661-01A	YES	YES	NO		69		183.66.0	Nationwide Children's Hospital	TCGA-44-7661-F33227	11a48e0b-2787-45f8-8a4d-920b7298072f	TCGA-44-7661	22	25			0	335	Lung Adenocarcinoma			YES			YES	C7F265C1-456C-4E5F-BB37-E6F8A40F8716	Scheduled Follow-up Submission	Progressive Disease	No	YES					Peripheral Lung	NO	12	6	YES	22	Yes	M0	N0	T2a	7661		WITH TUMOR	95	81	NO
TCGA-50-6595-01A	NO	NO	NO	YES	74		144.70.0	Nationwide Children's Hospital	TCGA-50-6595-F44127	AEA27241-AF39-4C5C-ADA3-91E25F21073D	TCGA-50-6595	22	13		187	0	182	Lung Adenocarcinoma			YES			YES	FB4A64E3-16BF-42B7-A9B4-638582A6929C	Scheduled Follow-up Submission	Progressive Disease	No	YES		YES				NO	12	6	YES		No	M0	N2	T2	6595		WITH TUMOR			YES
TCGA-78-7143-01A	NO	NO	NO	NO	62		166.67.0	Nationwide Children's Hospital	TCGA-78-7143-F16669	b280d071-c071-4b1f-8df7-1eb99db3a117	TCGA-78-7143	22	23			0	4608	Lung Adenocarcinoma			NO			NO	3BDC6A2F-C7D9-40DE-8BBD-E2BF1A37813B	Additional New Tumor Event		No	YES		NO			Central Lung		12	9	YES		No	M0	N0	T2	7143
TCGA-44-A4SU-01A	NO	NO	NO		67		264.60.0	Nationwide Children's Hospital	TCGA-44-A4SU-F49438	D0EC82D0-E3BC-4820-AD56-81831A4CF3EC	TCGA-44-A4SU	22	3			0	260	Lung Adenocarcinoma	74	3					DC7645A9-39B7-4AB6-BE02-C34E16105F2B	Scheduled Follow-up Submission	Progressive Disease	No	YES						NO	12	10	YES	50	No	MX	N0	T1a	A4SU	Other	WITH TUMOR	100	95	NO
TCGA-55-8091-01A					74		213.60.0	Nationwide Children's Hospital	TCGA-55-8091-F47820	B40ED298-8EB6-4147-BE8D-F6338BF3163B	TCGA-55-8091	22	28			0		Lung Adenocarcinoma	65		NO			NO	F35D565C-6A3D-47B5-86A2-21EB8CCD79C0	Scheduled Follow-up Submission	Complete Remission/Response	No	YES		NO				NO	12	8	NO		Yes, History of Prior Malignancy	MX	N0	T2	8091		TUMOR FREE			NO
TCGA-38-7271-01A	YES	YES	NO		72		166.67.0	Nationwide Children's Hospital	TCGA-38-7271-F18305	f7734211-9e7c-43ca-90e7-5c8de6e7bfee	TCGA-38-7271	22	10			0	304	Lung Adenocarcinoma	76		NO			NO	DF43A635-453D-4C8E-86D9-EEA1B9E17066	Additional New Tumor Event	Stable Disease	No	YES		NO					12	11	YES	25	Yes	M0	N0	T1	7271		WITH TUMOR	46	45	NO
TCGA-05-4403-01A					76		58.77.0	Nationwide Children's Hospital			TCGA-05-4403	22				0		Lung Adenocarcinoma							2ACCBEB4-B2D5-49C9-9363-FFDDC440FC79			No	YES							12				No	M0	N0	T2	4403
TCGA-49-4510-01A	YES	NO	NO	NO	51		58.77.0	Nationwide Children's Hospital	TCGA-49-4510-F58842	7F6D5AAD-0EEC-452F-9AEC-D99D92CD3A3E	TCGA-49-4510	22	25			0	502	Lung Adenocarcinoma		1					0F6BBC1E-A2B6-4A02-968E-36A7DDA1A2BE	Scheduled Follow-up Submission	Stable Disease	No	YES	80					NO	12	4	YES	55.5	No	M0	N1	T2	4510	Post-Adjuvant Therapy	WITH TUMOR			YES
TCGA-91-6836-01A					52		144.70.0	Nationwide Children's Hospital	TCGA-91-6836-F32646	5fc630d3-b549-4447-ba28-c379c0b08fa4	TCGA-91-6836	22	5			0		Lung Adenocarcinoma	97		NO				EF6E265D-5B54-4006-B126-D1C4FEBF3547	Scheduled Follow-up Submission	Complete Remission/Response	No	YES		NO				NO	12	6	NO	50	Yes	MX	N0	T2	6836		TUMOR FREE	101	109	NO
TCGA-44-8119-01A			NO		73		213.60.0	Nationwide Children's Hospital	TCGA-44-8119-F38976	B83A8367-B557-44BB-9319-F428D59570DE	TCGA-44-8119	22	8			0		Lung Adenocarcinoma	40	0					9C4EDDBC-DF79-4599-B7B4-230BA9EEBD36	Scheduled Follow-up Submission	Complete Remission/Response	No	YES						NO	12	1	NO	50	Yes, History of Prior Malignancy	M0	N0	T3	8119	Preoperative	TUMOR FREE	74	59	NO
TCGA-55-8301-01A	YES	YES	NO	NO	58		222.60.0	Nationwide Children's Hospital	TCGA-55-8301-F56261	F961BE96-B9C1-48C0-9CC2-B368B6495583	TCGA-55-8301	22	30			0	238	Lung Adenocarcinoma							3DFE194B-A4B8-46F6-BF60-BFB398291388	Scheduled Follow-up Submission	Partial Remission/Response	No	YES						NO	12	1	YES	100	No	MX	N0	T2a	8301		WITH TUMOR			NO
TCGA-55-1594-01A					68		37.77.0	Nationwide Children's Hospital			TCGA-55-1594	22				0		Lung Adenocarcinoma							B305A34F-AD84-4606-8BA3-F87E2B8322A9			No	YES							12				No	M0	N2	T2	1594
TCGA-J2-A4AE-01A					77		258.59.0	Nationwide Children's Hospital	TCGA-J2-A4AE-F55522	3A67D1E9-45FD-41D0-8E79-F27D9B40AE3A	TCGA-J2-A4AE	22	8			0		Lung Adenocarcinoma	89		NO			NO	57FE6E7E-D0A7-43CC-BA0C-4632BB469ED5	Scheduled Follow-up Submission	Complete Remission/Response	No	YES		NO				NO	12	1	NO		No	MX	N0	T1a	A4AE		TUMOR FREE			NO
TCGA-55-7907-01A	NO	NO		NO	77		196.64.0	Nationwide Children's Hospital	TCGA-55-7907-F60132	6ECFF27E-F203-441F-A6A5-2608A1B7989E	TCGA-55-7907	22	29			0	294	Lung Adenocarcinoma	75						F7ED9CD8-CD9B-487C-9042-C34F9202C6B7	Scheduled Follow-up Submission	Progressive Disease	No	YES						NO	12	5	YES	80	No	MX	N1	T2a	7907		WITH TUMOR	80	87	NO
TCGA-44-3917-01A					33		52.74.0	Nationwide Children's Hospital	TCGA-44-3917-F5229	e67f8c0a-a881-475e-80c7-42f9756190a8	TCGA-44-3917	22	18			0		Lung Adenocarcinoma	83						B332B811-3C4F-4046-876B-381835B8FC01			No	YES		NO					12	10	NO	16	No	M0	N0	T2	3917		TUMOR FREE			NO
TCGA-44-3917-01B					33		52.74.0	Nationwide Children's Hospital	TCGA-44-3917-F5229	e67f8c0a-a881-475e-80c7-42f9756190a8	TCGA-44-3917	22	18			0		Lung Adenocarcinoma	83						B332B811-3C4F-4046-876B-381835B8FC01			No	YES		NO					12	10	NO	16	No	M0	N0	T2	3917		TUMOR FREE			NO
TCGA-MP-A4SW-01A					53		264.60.0	Nationwide Children's Hospital			TCGA-MP-A4SW	22				0		Lung Adenocarcinoma	102		NO			NO	A153EA5D-D2FD-492B-BEB7-408340190FDC			No	YES		NO					12			15	No	M0	N1	T2	A4SW				101
TCGA-50-5932-01A	YES	NO	NO	NO	75		119.76.0	Nationwide Children's Hospital	TCGA-50-5932-F32080	aa578f39-0f94-41df-ad90-1a68f7a7fb43	TCGA-50-5932	22	16			0	1090	Lung Adenocarcinoma							AEF9852A-66A8-4E40-BC67-EE69CE1CD8D7	Scheduled Follow-up Submission	Progressive Disease	No	YES					Central Lung	NO	12	5	YES		Yes	M0	N1	T2	5932		WITH TUMOR			NO
TCGA-75-6207-01A	NO	NO					119.76.0	Nationwide Children's Hospital	TCGA-75-6207-F15092	53c4832a-9167-41ab-8172-0713906b893e	TCGA-75-6207	22	21					Lung Adenocarcinoma							9D053BB5-A5D1-4020-AB7A-989D55F2ACCD			No	YES					Peripheral Lung		12	7		10	No	M0	N2	T2	6207					NO
TCGA-55-6979-01A	YES	YES		NO	59		160.69.0	Nationwide Children's Hospital	TCGA-55-6979-F37057	7DAF16E2-34A6-40ED-99FB-8C3F3205DA98	TCGA-55-6979	22	22			0	195	Lung Adenocarcinoma			NO			NO	CDAF86CA-D631-442F-866A-79078311E8D8	Scheduled Follow-up Submission	Progressive Disease	No	YES		NO				NO	12	2	YES		Yes	M0	N1	T2	6979		WITH TUMOR			YES
TCGA-93-7347-01A					76		204.62.0	Nationwide Children's Hospital	TCGA-93-7347-F29886	3cb5e775-0ae6-4d83-8d2a-049f1eb2b119	TCGA-93-7347	22	30			0		Lung Adenocarcinoma	70	0	NO			NO	E17E34A9-725A-455E-A098-F9A19E36B97A	Scheduled Follow-up Submission	Complete Remission/Response	No	YES	100	NO			Central Lung		12	3	NO	11	No	MX	N0	T1a	7347	Other	TUMOR FREE	61	84	NO
TCGA-73-4670-01A					69		58.77.0	Nationwide Children's Hospital	TCGA-73-4670-F12983	9f66a7c0-c40c-412d-ab8c-b6bac0bfe58d	TCGA-73-4670	22	15			0		Lung Adenocarcinoma		2	NO			NO	5854FFEF-A054-47AA-AC4F-61A47BBCE27A				YES	50	NO			Peripheral Lung		12	6	NO	30	No	M1	N0	T2	4670	Adjuvant therapy				YES
TCGA-J2-A4AD-01A	NO	NO			61		258.59.0	Nationwide Children's Hospital	TCGA-J2-A4AD-F55524	7AD20CAA-27DA-470D-838D-F1A687F16E39	TCGA-J2-A4AD	22	8			0	524	Lung Adenocarcinoma			NO			NO	4C582465-6BD2-447D-8B87-A12C2ACB7F68	Scheduled Follow-up Submission		No	YES		NO				NO	12	1	YES	120	No	MX	N0	T1a	A4AD		WITH TUMOR			NO
TCGA-55-8511-01A			NO	NO	73		238.60.0	Nationwide Children's Hospital	TCGA-55-8511-F66028	E2BDF53C-410E-4BF9-910E-C89C1F94487E	TCGA-55-8511	22	1			0	460	Lung Adenocarcinoma	31						EE0BA4D5-AEA6-465E-878A-A022DA8835D1	Scheduled Follow-up Submission	Progressive Disease	No	YES						NO	12	10	YES	58	Yes, History of Prior Malignancy	MX	N0	T2a	8511		WITH TUMOR			NO
TCGA-75-5147-01A							84.73.0	Nationwide Children's Hospital	TCGA-75-5147-F11742	370b3d05-3d9b-4c7f-bcee-7def6e2322cf	TCGA-75-5147	22	7					Lung Adenocarcinoma			NO			NO	84F00385-9F72-4BBA-91BC-5B7C4F7EEB77		Complete Remission/Response	No	YES		NO			Peripheral Lung		12	4	NO		No	M0	N0	T2	5147	Adjuvant therapy	TUMOR FREE			NO
TCGA-78-7167-01A	NO	NO	NO	NO	77		183.66.0	Nationwide Children's Hospital	TCGA-78-7167-F17172	c8c4cb37-14b3-47ab-83a8-795fe5195bcb	TCGA-78-7167	22	4			0	726	Lung Adenocarcinoma			NO			NO	1F9F9C74-B797-4337-98FC-83BF1C4AABB5	Scheduled Follow-up Submission	Progressive Disease	No	YES		NO			Peripheral Lung		12	10	YES	64	No	M1	N0	T2	7167		WITH TUMOR			NO
TCGA-95-8494-01A					67		232.55.0	Nationwide Children's Hospital	TCGA-95-8494-F58476	5A2D5D46-74F5-48C7-8E7E-751B9C1F0BF3	TCGA-95-8494	22	10			0		Lung Adenocarcinoma			NO			NO	0C72D72D-BFB4-4A4F-8011-A4AB31F31107	Scheduled Follow-up Submission		No	YES		NO				YES	12	4			No	M0	N1	T2a	8494					NO
TCGA-55-8204-01A					87		213.60.0	Nationwide Children's Hospital	TCGA-55-8204-F47802	A13C7C7D-9375-4938-BE6F-E877CD27ADBD	TCGA-55-8204	22	28			0		Lung Adenocarcinoma	101						DE76246E-011C-4C68-A5E3-58275FF41194	Scheduled Follow-up Submission	Complete Remission/Response	No	YES						NO	12	8	NO		Yes, History of Prior Malignancy	MX	N0	T2a	8204		TUMOR FREE			NO
TCGA-49-AARQ-01A					41		423.36.0	Nationwide Children's Hospital	TCGA-49-AARQ-F72093	60C40E3D-7A62-4E0D-9272-99ED242A7606	TCGA-49-AARQ	22	10			0		Lung Adenocarcinoma	99.9	1					8162B96A-6088-49C6-9310-F816A3B57DC6	Scheduled Follow-up Submission	Complete Remission/Response	No	YES						NO	12	4	NO	60	No	MX	N0	T2	AARQ	Preoperative	TUMOR FREE	56.8	56.1	NO
TCGA-J2-A4AG-01A					66		258.59.0	Nationwide Children's Hospital	TCGA-J2-A4AG-F55526	E18C8E1A-90F4-4EBC-AD9D-7B4C8E64F099	TCGA-J2-A4AG	22	8			0		Lung Adenocarcinoma			NO			NO	95F2FE1C-87DC-4EBB-AD7F-875CD99F6B5A	Scheduled Follow-up Submission	Complete Remission/Response	No	YES		NO				NO	12	1	NO	25	No	MX	N0	T1b	A4AG		TUMOR FREE			NO
TCGA-L9-A443-01A					63		258.59.0	Nationwide Children's Hospital	TCGA-L9-A443-F46410	398C8700-07A7-4896-9EE8-F4E5D8693E79	TCGA-L9-A443	22	7			0		Lung Adenocarcinoma	61		NO			NO	4F0EBF81-49EF-4D2D-837C-B56E4662643C	Scheduled Follow-up Submission		No	YES		NO			Central Lung	NO	12	8	NO	90	Yes, History of Prior Malignancy	MX	N0	T1a	A443		TUMOR FREE	74	69	NO
TCGA-50-6591-01A					63		119.76.0	Nationwide Children's Hospital	TCGA-50-6591-F43833	911B7995-6444-4317-A9F1-A366B72E0186	TCGA-50-6591	22	4			0		Lung Adenocarcinoma							BE564E01-B081-4F3D-8B6A-65FDB5F00229	Scheduled Follow-up Submission	Progressive Disease	No	YES						NO	12	6	NO		No	M1	N0	T2	6591		WITH TUMOR			NO
TCGA-44-2665-01A					55		37.77.0	Nationwide Children's Hospital	TCGA-44-2665-F5298	9ee191ec-e1cb-48f8-a661-441671526c98	TCGA-44-2665	22	13			0		Lung Adenocarcinoma	71	0					050BDC49-DBE1-4EFC-A20E-234C1B9DD8EA		Stable Disease	No	YES		NO					12	10	NO		No	M0	N1	T2	2665	Post-Adjuvant Therapy	TUMOR FREE	79	105	YES
TCGA-MP-A4TC-01A					77		264.60.0	Nationwide Children's Hospital			TCGA-MP-A4TC	22				0		Lung Adenocarcinoma	68		NO			NO	B81F1A93-2CD3-4F0A-9FD4-CC95F4DCBD6D			No	YES		NO					12			125	Yes, History of Prior Malignancy	M0	N2	T1	A4TC				76
TCGA-38-4629-01A	NO	NO	NO	NO	68		58.77.0	Nationwide Children's Hospital	TCGA-38-4629-F4887	5ece2db2-89aa-48dc-92be-f4df4bbbef10	TCGA-38-4629	22	14			0	379	Lung Adenocarcinoma			NO			NO	89E2FA38-4F55-49BF-9E34-28B181CAE49F			No	YES		NO			Peripheral Lung		12	12	YES	100	Yes	M0	N0	T3	4629		WITH TUMOR			NO
TCGA-38-4626-01A					57		58.77.0	Nationwide Children's Hospital	TCGA-38-4626-F4507	f7d53f3d-25b9-43f5-9d12-f4c38dd72816	TCGA-38-4626	22	8			0		Lung Adenocarcinoma	57						DEA2C380-67B8-4CE6-9530-CF116C12859B			No	YES					Central Lung		12	12	NO	40	No	M0	N0	T2b	4626		TUMOR FREE	68	85	NO
TCGA-91-6847-01A	NO	YES		NO	62		160.69.0	Nationwide Children's Hospital	TCGA-91-6847-F32637	FB5F10C7-9572-4BC0-B5F4-245D88F78D07	TCGA-91-6847	22	5			0	772	Lung Adenocarcinoma							E8D3185C-CEED-43CB-8DE4-98C562627166	Scheduled Follow-up Submission	Stable Disease	No	YES		NO				YES	12	6	YES		No	MX	N0	T2	6847		WITH TUMOR			NO
TCGA-55-7911-01A	NO	YES	NO	NO	70		196.64.0	Nationwide Children's Hospital	TCGA-55-7911-F48785	6C67B112-4633-4A5E-8731-C18F764ADB3E	TCGA-55-7911	22	20			0	515	Lung Adenocarcinoma			NO			NO	7C1083FE-4BA1-4A68-99EF-655CF102B5B5	Scheduled Follow-up Submission	Complete Remission/Response	No	YES		NO				NO	12	9	YES	96	No	MX	N0	T1a	7911		TUMOR FREE		86	NO
TCGA-55-8085-01A					64		213.60.0	Nationwide Children's Hospital	TCGA-55-8085-F65697	CA62DF16-FCE4-47BE-8B87-6AC56FCECE60	TCGA-55-8085	22	26			0		Lung Adenocarcinoma	51						55FD31D4-A99B-4643-9833-BA0ADAA4854E	Scheduled Follow-up Submission	Complete Remission/Response	No	YES						NO	12	9	NO		No	M0	N0	T1b	8085		TUMOR FREE	46	45	NO
TCGA-50-5072-01A	NO	YES		NO	74		144.70.0	Nationwide Children's Hospital	TCGA-50-5072-F32059	cf66baf1-832b-4912-8b40-7be0f47acbbc	TCGA-50-5072	22	16			0	213	Lung Adenocarcinoma			YES			YES	740BABD2-A830-4EB0-815F-0A312D073D39	Scheduled Follow-up Submission	Progressive Disease	Yes	YES		YES				NO	12	5	YES	15	No	M0	N2	T2	5072		WITH TUMOR			YES
TCGA-91-7771-01A					62		196.64.0	Nationwide Children's Hospital	TCGA-91-7771-F37916	5CE9E189-97C2-4431-8689-FBACCA998B25	TCGA-91-7771	22	6			0		Lung Adenocarcinoma			NO				8CB4D4FB-FE04-4F15-8E47-72242CD49371	Scheduled Follow-up Submission	Complete Remission/Response	No	YES		NO				NO	12	12	NO	75	Yes	MX	N0	T3	7771		TUMOR FREE			YES
TCGA-86-8585-01A					57		238.60.0	Nationwide Children's Hospital	TCGA-86-8585-F46400	FCD3444C-82E2-4973-B06F-3F0471930298	TCGA-86-8585	22	19			0		Lung Adenocarcinoma			NO				4E4974A9-746D-407A-AFDB-6D541F681194	Scheduled Follow-up Submission	Complete Remission/Response	No	YES		NO			Peripheral Lung	YES	12	9	NO		No	M0	N0	T2a	8585		TUMOR FREE			NO
TCGA-05-5425-01A					68		84.73.0	Nationwide Children's Hospital	TCGA-05-5425-F36403	714FDB72-0FF1-4CF6-A6F1-ED54B3FF03DD	TCGA-05-5425	22	30			0	486	Lung Adenocarcinoma							0CD513F4-BAE5-45D0-8986-4E776C2B2A33	Scheduled Follow-up Submission	Progressive Disease	No	YES						NO	12	10	YES	40	No	M0	N1	T2b	5425		WITH TUMOR			YES
TCGA-05-4405-01A					74		144.70.0	Nationwide Children's Hospital	TCGA-05-4405-F36494	83F914FE-F0D0-4B75-9F4B-DD17F59C62A0	TCGA-05-4405	22	31			0		Lung Adenocarcinoma							819DF197-7BF1-4152-B396-8F4DC5AAD5AD	Scheduled Follow-up Submission	Complete Remission/Response	No	YES						NO	12	10	NO	65	Yes	M0	N0	T2	4405		TUMOR FREE			NO
TCGA-75-7031-01A	NO	NO	NO	NO			160.69.0	Nationwide Children's Hospital	TCGA-75-7031-F15880	2281f87d-086d-493d-9bbe-8a41dc1a216f	TCGA-75-7031	22	16					Lung Adenocarcinoma		0					F906F34A-3B24-4040-8E3F-428473C90368			No	YES					Peripheral Lung		12	8	NO	5	No	M0	N0	T2	7031					NO
TCGA-L9-A743-01A					56		406.37.0	Nationwide Children's Hospital	TCGA-L9-A743-F66554	F0B1840B-09D9-4DEB-978E-CEAB73FADEC9	TCGA-L9-A743	22	20			0		Lung Adenocarcinoma	45	0	NO			NO	CD0D1A29-BC6D-4F78-A7EC-560BC816E9F6	Scheduled Follow-up Submission	Complete Remission/Response	No	YES		NO			Central Lung	NO	12	10	NO	40.5	Yes, History of Prior Malignancy	M0	N1	T2a	A743	Preoperative	TUMOR FREE	81	78	YES
TCGA-78-7148-01A			NO	YES	71		166.67.0	Nationwide Children's Hospital	TCGA-78-7148-F17170	208bf3ac-10c9-4d63-ad87-332ddb82517d	TCGA-78-7148	22	4		182	0	182	Lung Adenocarcinoma			NO			NO	660AE6D6-5906-4588-BAF0-BE5815DA352F	Scheduled Follow-up Submission		No	YES		NO			Peripheral Lung		12	10	YES	57	No	M0	N1	T2	7148					NO
TCGA-91-6830-01A	NO	YES		YES	65		160.69.0	Nationwide Children's Hospital	TCGA-91-6830-F32595	557AFAED-4E1C-41AA-BFA7-0BEFFDF7227D	TCGA-91-6830	22	4		18	0	18	Lung Adenocarcinoma							B33D58C3-5C97-417C-A5DF-3961639B6AD9	Scheduled Follow-up Submission		No	YES		NO				YES	12	6	YES	12	No	MX	N1	T1	6830					NO
TCGA-50-5045-01A	YES	YES	NO		57		84.73.0	Nationwide Children's Hospital	TCGA-50-5045-F32015	403e16e6-4db0-4a0c-866e-00b26e1fad62	TCGA-50-5045	22	15			0	1433	Lung Adenocarcinoma							A4DB8A0E-5C50-4C43-8001-3329B8209088	Scheduled Follow-up Submission	Progressive Disease	No	YES						NO	12	5	YES		No	M0	N1	T2	5045		WITH TUMOR
TCGA-L9-A444-01A					60		258.59.0	Nationwide Children's Hospital	TCGA-L9-A444-F46270	B1C53C2B-9FB6-4024-888D-0192BE820066	TCGA-L9-A444	22	5			0		Lung Adenocarcinoma	57		NO			NO	BFEFC79C-6ED8-4C19-BB82-E89F49EA059B	Scheduled Follow-up Submission	Complete Remission/Response	No	YES		NO			Central Lung	NO	12	8	NO	10	Yes, History of Prior Malignancy	MX	N0	T1a	A444		TUMOR FREE	62	54	NO
TCGA-99-8032-01A					61		213.60.0	Nationwide Children's Hospital			TCGA-99-8032	22				0		Lung Adenocarcinoma	54		YES			NO	B8ED2FA3-B0B7-499C-BBB5-3C66531B383F			No	YES		YES	YES	G12C			12			90	No	M0	N0	T1a	8032
TCGA-95-A4VN-01A					62		278.56.0	Nationwide Children's Hospital	TCGA-95-A4VN-F58501	878D540E-C5BA-45D0-BC56-66F85D659549	TCGA-95-A4VN	22	11			0		Lung Adenocarcinoma	50	1	YES			NO	FEFFC59E-BDA3-49DF-BB01-08C5FBEC5EBC	Scheduled Follow-up Submission	Stable Disease	No	YES		NO				NO	12	4	NO	42	Yes, History of Prior Malignancy	M0	N1	T2a	A4VN	Pre-Adjuvant Therapy	TUMOR FREE	65	67	NO
TCGA-05-4390-01A					58		119.76.0	Nationwide Children's Hospital	TCGA-05-4390-F36456	732D9E3F-5FEB-41B6-BE2A-142253ED6110	TCGA-05-4390	22	31			0	395	Lung Adenocarcinoma							5E4ACED5-63AF-4592-B75C-571B4E57C16A	Scheduled Follow-up Submission	Complete Remission/Response	No	YES						NO	12	10	YES	15	No	M0	N0	T2	4390		TUMOR FREE			YES
TCGA-75-6214-01A							160.69.0	Nationwide Children's Hospital	TCGA-75-6214-F15860	17e757bc-f78c-4be4-8ece-1109e163916d	TCGA-75-6214	22	12					Lung Adenocarcinoma		0					B3103A23-3C77-46E9-BE75-89F374ECC048		Progressive Disease	No	YES					Peripheral Lung		12	8	YES	40	No	M0	N2	T2	6214	Adjuvant therapy				NO
TCGA-86-8668-01A					61		238.60.0	Nationwide Children's Hospital	TCGA-86-8668-F66084	1631B6D9-406C-4FFC-BC60-4B3233895638	TCGA-86-8668	22	2			0		Lung Adenocarcinoma		0					C0E48B40-517E-4536-8D87-13478F0B4711	Scheduled Follow-up Submission	Complete Remission/Response	No	YES	100	NO			Peripheral Lung	NO	12	10	NO		No	M0	N0	T1b	8668	Other	TUMOR FREE			NO
TCGA-67-6217-01A	YES		NO	NO	73		119.76.0	Nationwide Children's Hospital	TCGA-67-6217-F13566	b1095ed9-280b-4211-9fa7-7013f6da1d5d	TCGA-67-6217	22	5			0	296	Lung Adenocarcinoma			YES	L858R	RT-PCR	YES	49E40A1B-9347-4060-913C-A2C0AD18C6B1	Scheduled Follow-up Submission	Progressive Disease	No	YES		YES	NO		Central Lung		12	7	YES		Yes	M0	N1	T2a	6217		WITH TUMOR			NO
TCGA-NJ-A55R-01A					67		278.56.0	Nationwide Children's Hospital	TCGA-NJ-A55R-F50899	02EB453B-5913-4F97-A3A3-6E67ECC7568E	TCGA-NJ-A55R	22	1			0		Lung Adenocarcinoma			NO			NO	A0B14D01-2471-41C0-B2B6-445A5C576ADD	Scheduled Follow-up Submission	Stable Disease	No	YES		NO				NO	12	11	NO	5	No	MX	N0	T1b	A55R		TUMOR FREE			NO
TCGA-49-4506-01A	NO	NO	NO		68		58.77.0	Nationwide Children's Hospital	TCGA-49-4506-F58841	8288A530-E15A-453B-A072-A3824044F22E	TCGA-49-4506	22	25			0	692	Lung Adenocarcinoma		2					79CDF1BF-0CDF-409F-98BC-BEF7284AB928	Scheduled Follow-up Submission	Progressive Disease	No	YES	70				Peripheral Lung	NO	12	4	YES	100	No	M0	N1	T2	4506	Post-Adjuvant Therapy				YES
TCGA-67-3772-01A					82		37.77.0	Nationwide Children's Hospital			TCGA-67-3772	22				0		Lung Adenocarcinoma			NO			NO	4F1D0B92-8DD5-4BB6-997B-356E383ADC8C			No	YES		NO					12				No	M0	N0	T2	3772
TCGA-55-6980-01A					56		160.69.0	Nationwide Children's Hospital	TCGA-55-6980-F46642	280D1471-7D87-47DB-AAD2-6281B990E361	TCGA-55-6980	22	13			0		Lung Adenocarcinoma			NO			NO	23281AEF-3BED-4805-8A53-6555A56305D1	Scheduled Follow-up Submission	Complete Remission/Response	No	YES		NO				NO	12	8	NO		No	M0	N0	T1	6980		TUMOR FREE			NO
TCGA-MP-A4T4-01A					68		278.56.0	Nationwide Children's Hospital			TCGA-MP-A4T4	22				0		Lung Adenocarcinoma	53		NO			NO	B6864279-C1CC-404C-B30C-45948A00C307			No	YES		NO					12			50	No	M0	N1	T2	A4T4				110
TCGA-62-8398-01A					55		232.55.0	Nationwide Children's Hospital			TCGA-62-8398	22				0		Lung Adenocarcinoma			NO			NO	76CB9B3D-D253-497F-BBE2-90EB4DB94DDC			No	YES		NO			Central Lung		12			20	No	M0	N2	T2	8398
TCGA-55-8620-01A					60		238.60.0	Nationwide Children's Hospital	TCGA-55-8620-F59081	B7AB11B2-6770-4031-B6CC-3416F978BF1A	TCGA-55-8620	22	30			0		Lung Adenocarcinoma	64		NO			NO	9333EB55-9E79-4171-89E2-DCE8D4542A85	Scheduled Follow-up Submission	Progressive Disease	No	YES		NO			Central Lung	NO	12	4	NO	154	No	M1b	N1	T1a	8620		WITH TUMOR			NO
TCGA-55-8506-01A					62		238.60.0	Nationwide Children's Hospital			TCGA-55-8506	22				0		Lung Adenocarcinoma							FE3BA8DE-AB24-480E-AB66-2B3B864B3504			No	YES					Peripheral Lung		12				No	MX	N0	T3	8506
TCGA-50-5931-01A	NO	NO		NO	75		119.76.0	Nationwide Children's Hospital	TCGA-50-5931-F32067	6abc6f4d-700c-429a-8a96-cab76c1bd8ae	TCGA-50-5931	22	16			0	425	Lung Adenocarcinoma							59DE6F3A-0FEA-4AF6-BC20-88B37C3DCF6C	Scheduled Follow-up Submission	Progressive Disease	No	YES					Central Lung	NO	12	5	YES	40	No	M0	N0	T2	5931		WITH TUMOR			NO
TCGA-78-8640-01A					59		238.60.0	Nationwide Children's Hospital	TCGA-78-8640-F46106	E3777749-8064-4049-A825-BB96779AEAD3	TCGA-78-8640	22	4			0		Lung Adenocarcinoma			NO			NO	8FDC83D0-FDE9-48BF-A75E-6198871D7BC7	Scheduled Follow-up Submission	Complete Remission/Response	No	YES		NO			Peripheral Lung	NO	12	8	NO	45	No	M0	N1	T1	8640					NO
TCGA-69-7978-01A			NO		59		204.62.0	Nationwide Children's Hospital	TCGA-69-7978-F39911	66B2ED66-C09F-466B-8570-8D90725A6E44	TCGA-69-7978	22	11			0		Lung Adenocarcinoma			YES	Other			75F2372C-BA53-498B-B641-4F7B3C9869A1	Scheduled Follow-up Submission	Stable Disease	No	YES					Peripheral Lung	NO	12	2	NO	80	No	MX	N1	T2b	7978			91	75	NO
TCGA-49-AARO-01A	YES	NO	NO		39		423.36.0	Nationwide Children's Hospital	TCGA-49-AARO-F70571	FC43C360-D46F-4775-B16A-C5739011E368	TCGA-49-AARO	22	25			0	3521	Lung Adenocarcinoma	103.3	3					6C3A4C19-8FC6-4917-87F9-896509475E49	Scheduled Follow-up Submission	Stable Disease	No	YES	40					NO	12	2	YES		No	MX	N0	T1a	AARO	Post-Adjuvant Therapy	WITH TUMOR	84.4	83.9	YES
TCGA-86-8054-01A					61		213.60.0	Nationwide Children's Hospital	TCGA-86-8054-F41092	8F4BDD45-6498-4773-B290-73CAA6C38692	TCGA-86-8054	22	12			0		Lung Adenocarcinoma		2	NO			NO	4C9B8F48-9DA5-498F-AB4C-A581DBA04158	Scheduled Follow-up Submission	Complete Remission/Response	No	YES	80	NO			Central Lung	NO	12	3	NO	9	No	M0	N1	T2b	8054	Preoperative	TUMOR FREE			YES
TCGA-55-7281-01A	YES	YES	NO	NO	70		166.67.0	Nationwide Children's Hospital	TCGA-55-7281-F47807	0804D88A-04B2-4C56-9A68-68D39DDB1617	TCGA-55-7281	22	28			0	339	Lung Adenocarcinoma							458559D6-07DC-415C-8578-047CDC84A633	Scheduled Follow-up Submission	Partial Remission/Response	No	YES		NO				NO	12	8	YES	20	No	M0	N0	T1b	7281		WITH TUMOR			NO
TCGA-55-7910-01A	NO	YES			50		196.64.0	Nationwide Children's Hospital	TCGA-55-7910-F66140	50A3A722-AEC7-4FBC-AFDA-7B45FEA1263A	TCGA-55-7910	22	3			0	1018	Lung Adenocarcinoma	44						3D44DBAB-D1AF-4E76-902F-B2B9BB645BF0	Scheduled Follow-up Submission		No	YES					Peripheral Lung	NO	12	10	YES	15	No	M0	N0	T2b	7910		WITH TUMOR	91	91	YES
TCGA-L9-A5IP-01A					40		406.37.0	Nationwide Children's Hospital			TCGA-L9-A5IP	22				0		Lung Adenocarcinoma			YES		FISH	YES	6B835A89-359C-4081-A5C7-8B9D227DBC75			No	YES		NO					12				No	M1b	N2	T3	A5IP
TCGA-91-6829-01A					78		144.70.0	Nationwide Children's Hospital	TCGA-91-6829-F32591	3d7c1967-95c7-4bfe-ac6c-b8e1de1816c8	TCGA-91-6829	22	4			0		Lung Adenocarcinoma							F89FCF7E-8612-409C-AC98-3DC821F1F60E	Scheduled Follow-up Submission	Progressive Disease	No	YES	0	NO				NO	12	6	NO	94.5	No	MX	N0	T2	6829					NO
TCGA-55-7816-01A					49		196.64.0	Nationwide Children's Hospital	TCGA-55-7816-F60131	6AFEC225-5C90-4B90-8F48-FB7786DF92B3	TCGA-55-7816	22	29			0		Lung Adenocarcinoma							1C4F9B9E-2C4F-4BA2-944D-520DC49B9658	Scheduled Follow-up Submission	Progressive Disease	No	YES						NO	12	5	NO		No	MX	NX	TX	7816		WITH TUMOR			NO
TCGA-53-7813-01A					51		196.64.0	Nationwide Children's Hospital	TCGA-53-7813-F39281	F1618090-79FF-4125-8030-11B958CA39B2	TCGA-53-7813	22	31			0		Lung Adenocarcinoma	88		NO			NO	4636C5E3-F9BE-464D-B63F-6CB003AEC31D	Scheduled Follow-up Submission		No	YES		NO				YES	12	1		35	No	M0	N0	T4	7813			69	91	YES
TCGA-44-6779-01A	YES	NO	NO		50		144.70.0	Nationwide Children's Hospital	TCGA-44-6779-F15758	8f506af0-e7ee-46c3-b57c-ab3eace80f10	TCGA-44-6779	22	12			0	232	Lung Adenocarcinoma	44						BD663029-F88A-4C58-B46D-5DB1D6980145	Scheduled Follow-up Submission		No	YES							12	9	YES	15	No	MX	N1	T2	6779		WITH TUMOR	83	48	YES
TCGA-50-5936-01A	YES	NO	YES	NO	58		84.73.0	Nationwide Children's Hospital	TCGA-50-5936-F32110	a515c2f5-9d6e-4d08-a136-8480b38b7e6b	TCGA-50-5936	22	17	177		0	150	Lung Adenocarcinoma			YES				861B680E-3E8B-4945-9A0C-CF0973023166	Scheduled Follow-up Submission	Progressive Disease	No	YES		YES	YES	G12C		NO	12	5	YES		No	M0	N2	T2	5936		WITH TUMOR			NO
TCGA-73-A9RS-01A					41		423.36.0	Nationwide Children's Hospital	TCGA-73-A9RS-F64487	3D9025D6-1190-49DC-986A-FC52C19BBA9B	TCGA-73-A9RS	22	3			0		Lung Adenocarcinoma		1	YES		FISH	YES	7B9B507F-52C6-4378-88DE-BB5B744E3C70	Scheduled Follow-up Submission	Progressive Disease	No	YES	80	YES	NO		Peripheral Lung	NO	12	9	NO	11	No	M0	N0	T3	A9RS	Preoperative	WITH TUMOR	81.9	60.2	NO
TCGA-55-7573-01A					72		166.67.0	Nationwide Children's Hospital	TCGA-55-7573-F46657	483D103F-ADB6-45F2-991D-ED029568C19C	TCGA-55-7573	22	13			0		Lung Adenocarcinoma	51		NO			NO	E11F298E-D8EE-49DD-8225-C6BA48A2EBA5	Scheduled Follow-up Submission	Complete Remission/Response	No	YES		NO			Central Lung	NO	12	8	NO		Yes	MX	N0	T1b	7573		TUMOR FREE	119	134	NO
TCGA-49-4501-01A	YES	NO	NO		67		58.77.0	Nationwide Children's Hospital	TCGA-49-4501-F7014	0d45623b-abf3-45d1-bcd6-319ebd5a50de	TCGA-49-4501	22	2			0	545	Lung Adenocarcinoma		1					72A7EE27-2E86-453C-81E9-31D1EAAC2098		Progressive Disease	No	YES							12	2	YES		Yes	M0	N0	T2	4501	Other	WITH TUMOR			NO
TCGA-05-5715-01A					69		84.73.0	Nationwide Children's Hospital			TCGA-05-5715	22				0		Lung Adenocarcinoma							28AD2946-2981-4537-9698-9BC9D6C2AC68			No	YES							12				No	M0	N0	T2a	5715
TCGA-05-4249-01A					67		52.74.0	Nationwide Children's Hospital	TCGA-05-4249-F36327	485963A2-753D-4E86-B3DF-E3F66189ABEE	TCGA-05-4249	22	29			0		Lung Adenocarcinoma							C1AAC065-7D06-4514-98BC-FE553F789E9C	Scheduled Follow-up Submission	Complete Remission/Response	No	YES					Peripheral Lung	NO	12	10	NO	52	No	M0	N0	T2	4249		TUMOR FREE			NO
TCGA-93-A4JN-01A					71		264.60.0	Nationwide Children's Hospital	TCGA-93-A4JN-F56980	014DBA19-FC98-48AD-8BE7-F9F6FC3E6375	TCGA-93-A4JN	22	27			0		Lung Adenocarcinoma		1	YES		FISH	YES	4429FF68-69FD-4747-8A0B-76CA6FC78551	Scheduled Follow-up Submission	Stable Disease	No	YES		YES	NO			NO	12	2	NO	40	No	M1a	N0	T2a	A4JN		WITH TUMOR			YES
TCGA-55-6642-01A					63		144.70.0	Nationwide Children's Hospital	TCGA-55-6642-F45614	A3AE45C0-A9BD-4E60-93D7-9017BF3411E0	TCGA-55-6642	22	17			0		Lung Adenocarcinoma							EE0D316E-387A-4CAF-9846-A2973F51AFD1	Scheduled Follow-up Submission	Complete Remission/Response	No	YES						NO	12	7	NO		No	MX	N0	T2	6642		TUMOR FREE			NO
TCGA-55-6984-01A	YES	NO	NO	NO	71		160.69.0	Nationwide Children's Hospital	TCGA-55-6984-F45632	DB66DE4C-0099-4F8A-8ABA-4D7D43922A68	TCGA-55-6984	22	17			0	724	Lung Adenocarcinoma			NO			NO	B95E05C5-F4AC-44BB-9169-EF120FB5D809	Scheduled Follow-up Submission	Progressive Disease	No	YES		NO				NO	12	7	YES		No	M0	N1	T2	6984		WITH TUMOR			YES
TCGA-50-5051-01A	NO	NO	NO	NO	42		144.70.0	Nationwide Children's Hospital	TCGA-50-5051-F32019	c0485b95-039c-4102-9293-f2829790b4f3	TCGA-50-5051	22	15			0	184	Lung Adenocarcinoma			YES				67163653-11EF-42D5-9455-FF894A9A160E	Scheduled Follow-up Submission	Progressive Disease	No	YES		YES	YES	Other		NO	12	5	YES	30	No	M0	N2	T2	5051		WITH TUMOR			YES
TCGA-55-8508-01A					60		238.60.0	Nationwide Children's Hospital	TCGA-55-8508-F66137	58A4C50E-35F0-439A-B28A-732F1048D6C4	TCGA-55-8508	22	3			0		Lung Adenocarcinoma							B09E8630-70A7-4FC1-802C-06623B26621D	Scheduled Follow-up Submission	Complete Remission/Response	No	YES					Central Lung	NO	12	10	NO		No	MX	N1	T2a	8508		TUMOR FREE			YES
TCGA-55-7725-01A					68		196.64.0	Nationwide Children's Hospital	TCGA-55-7725-F46647	6AC6EF5E-2614-45DD-8C0B-9F1053CF037A	TCGA-55-7725	22	13			0		Lung Adenocarcinoma		0	NO			NO	6C50CC02-DE00-4B2B-A541-6047E7E055CF	Scheduled Follow-up Submission	Complete Remission/Response	No	YES	100	NO			Central Lung	NO	12	8	NO	16	Yes	MX	N0	T1a	7725	Post-Adjuvant Therapy	TUMOR FREE	88	64	NO
TCGA-86-8055-01A			NO		79		213.60.0	Nationwide Children's Hospital	TCGA-86-8055-F40636	BA1E1408-283C-44C3-BA03-E0144E835EC2	TCGA-86-8055	22	26			0		Lung Adenocarcinoma			NO				8D796622-4914-4E6A-9CCA-7A97585239D0	Scheduled Follow-up Submission	Complete Remission/Response	No	YES		NO			Peripheral Lung	NO	12	2	NO	60	No	M0	N1	T2a	8055		TUMOR FREE			NO
TCGA-44-2656-01A					59		37.77.0	Nationwide Children's Hospital	TCGA-44-2656-F5294	ca338d6c-2526-45f1-9b0d-c0a045d0ac8c	TCGA-44-2656	22	8			0		Lung Adenocarcinoma	72						A167CF9B-F2BB-49FC-85BC-3FDDBF42BB6F		Complete Remission/Response	No	YES		NO					12	10	NO	23	No	M0	N0	T2	2656		TUMOR FREE	86	84	NO
TCGA-44-2656-01B					59		37.77.0	Nationwide Children's Hospital	TCGA-44-2656-F5294	ca338d6c-2526-45f1-9b0d-c0a045d0ac8c	TCGA-44-2656	22	8			0		Lung Adenocarcinoma	72						A167CF9B-F2BB-49FC-85BC-3FDDBF42BB6F		Complete Remission/Response	No	YES		NO					12	10	NO	23	No	M0	N0	T2	2656		TUMOR FREE	86	84	NO
TCGA-62-A472-01A	NO	YES	NO		70		258.59.0	Nationwide Children's Hospital	TCGA-62-A472-F51442	1082EB06-8D5B-4D85-8A83-B2125E571F3E	TCGA-62-A472	22	19			0	290	Lung Adenocarcinoma		1	NO			NO	F6F835CF-B8DF-4FAE-915D-6CEA85D25EB4	Scheduled Follow-up Submission	Partial Remission/Response	No	YES	80	NO			Central Lung	NO	12	11	YES	60	No	M0	N0	T3	A472	Preoperative	WITH TUMOR			NO
TCGA-78-7158-01A			NO	NO	59		166.67.0	Nationwide Children's Hospital	TCGA-78-7158-F16166	cd749669-0955-4e60-80d4-d02a208e1f64	TCGA-78-7158	22	15			0	132	Lung Adenocarcinoma			NO			NO	2179606B-784D-40E2-B5D4-758A83141006	Scheduled Follow-up Submission		No	YES		NO			Peripheral Lung		12	9	YES	14	No	M0	N2	T4	7158		WITH TUMOR			YES
TCGA-05-4418-01A					69		58.77.0	Nationwide Children's Hospital			TCGA-05-4418	22				0		Lung Adenocarcinoma							2B9ABDF3-F15D-4F85-9FC7-336FC49384CD			No	YES							12			25	Yes	M0	N2	T3	4418
TCGA-95-7948-01A					42		204.62.0	Nationwide Children's Hospital	TCGA-95-7948-F29540	DE1F1595-55A3-445C-A427-26050FE637FA	TCGA-95-7948	22	22			0		Lung Adenocarcinoma	87						1FD59604-6007-49B7-A129-F2625ADABDC7	Scheduled Follow-up Submission		No	YES							12	3	NO	0.15	Yes	M0	N0	T2a	7948		TUMOR FREE		79	NO
TCGA-80-5607-01A	NO	NO	NO	NO			160.69.0	Nationwide Children's Hospital	TCGA-80-5607-F15867	f401b266-27b0-450f-a213-254caa5e63c9	TCGA-80-5607	22	15					Lung Adenocarcinoma		1					AA720769-6C1D-4041-92F2-B3D5A5405A92			No	YES					Peripheral Lung		12	8	YES	15	Yes	M0	N1	T2	5607		WITH TUMOR			NO
TCGA-MP-A4T7-01A					75		264.60.0	Nationwide Children's Hospital			TCGA-MP-A4T7	22				0		Lung Adenocarcinoma	57		NO			NO	B4157BD5-70E1-4DD1-8EF5-B63971CF36E0			No	YES		NO					12			50	No	M1	N0	T2	A4T7				91
TCGA-97-A4LX-01A					81	Lingula	264.60.0	Nationwide Children's Hospital	TCGA-97-A4LX-F57384	81B37883-9051-4643-B671-9899F7A40B07	TCGA-97-A4LX	22	10			0		Lung Adenocarcinoma	61	0	NO			NO	986689AC-8928-4ED6-B803-66F5C7043350	Scheduled Follow-up Submission	Complete Remission/Response	No	YES		YES	YES	G12A		NO	12	3	NO	120	Yes, History of Synchronous/Bilateral Malignancy	M0	N0	T2a	A4LX	Other	TUMOR FREE	96	90	NO
TCGA-55-6968-01A					61		160.69.0	Nationwide Children's Hospital	TCGA-55-6968-F56247	78B86F68-8C53-4B9F-8321-02FDEB8CB702	TCGA-55-6968	22	30			0		Lung Adenocarcinoma							762148F9-3D2D-4EAA-8874-FEEB61260B78	Scheduled Follow-up Submission	Stable Disease	No	YES						NO	12	1	NO		No	M1	N0	T1	6968		WITH TUMOR			YES
TCGA-69-7764-01A					75		196.64.0	Nationwide Children's Hospital	TCGA-69-7764-F20992	7523c29c-28ca-4dcc-8407-7545d04f3af4	TCGA-69-7764	22	26			0		Lung Adenocarcinoma		0	YES			NO	45622D1B-603D-42A6-A3EA-D1A92DC3B29E	Scheduled Follow-up Submission		No	YES		NO			Peripheral Lung		12	1	NO	30	No	M0	N0	T1b	7764	Other	TUMOR FREE			NO
TCGA-05-4433-01A					82		144.70.0	Nationwide Children's Hospital	TCGA-05-4433-F36530	B10301B6-0587-4CEE-84C4-26BEC5D40614	TCGA-05-4433	22	1			0		Lung Adenocarcinoma							B6C2442F-51A2-45C9-A4E2-8C98E0558992	Scheduled Follow-up Submission	Complete Remission/Response	No	YES						NO	12	11	NO	1	No	M0	N0	T2	4433		TUMOR FREE
TCGA-55-6543-01A					60		119.76.0	Nationwide Children's Hospital	TCGA-55-6543-F46659	328EC06C-F892-4324-A3ED-FB2A283BCC0B	TCGA-55-6543	22	13			0		Lung Adenocarcinoma							314D02BD-A17F-4542-A310-6D5C7BFCFABB	Scheduled Follow-up Submission	Complete Remission/Response	No	YES					Peripheral Lung	NO	12	8	NO	60	No	MX	N0	T1b	6543		TUMOR FREE			NO
TCGA-55-7728-01A					64		204.62.0	Nationwide Children's Hospital	TCGA-55-7728-F47841	CCDF4AD4-BA17-413E-8B00-5016A4E94A75	TCGA-55-7728	22	29			0		Lung Adenocarcinoma	64		NO			NO	FF77A33D-CC47-4407-AF37-14494E8D28C1	Scheduled Follow-up Submission	Complete Remission/Response	No	YES		NO				NO	12	8	NO	30	No	MX	N0	T2a	7728		TUMOR FREE		74	NO
TCGA-44-A4SS-01A					73		264.60.0	Nationwide Children's Hospital	TCGA-44-A4SS-F49165	7E3B2EA0-2129-451F-A502-B57F589DC4F8	TCGA-44-A4SS	22	26			0		Lung Adenocarcinoma	54						C4B2BE86-72AC-491B-86A0-12BDF92D7711	Scheduled Follow-up Submission	Complete Remission/Response	No	YES						NO	12	9	NO	90	No	M0	N0	T1b	A4SS		TUMOR FREE	88	71	NO
TCGA-38-4627-01A					64		58.77.0	Nationwide Children's Hospital	TCGA-38-4627-F4508	f15fda3c-b93a-4ae2-95d3-c372aed5ea42	TCGA-38-4627	22	8			0		Lung Adenocarcinoma							CAFCCC9C-E90A-4ECE-B000-AC81582E14D0			No	YES					Central Lung		12	12			No	M0	N1	T1b	4627					NO
TCGA-78-7633-01A					67		183.66.0	Nationwide Children's Hospital	TCGA-78-7633-F21095	f9269731-0d0b-4785-9c9b-6b9766317d29	TCGA-78-7633	22	31			0		Lung Adenocarcinoma	57		NO			NO	8E098A9A-ABE8-4830-86AF-CC8115F3FB3A	Scheduled Follow-up Submission		No	YES		NO					12	1		94	Yes	M0	N0	T2	7633
TCGA-55-8205-01A	YES	YES		NO	76		213.60.0	Nationwide Children's Hospital	TCGA-55-8205-F59040	324D6FE4-9E52-45A9-82EB-03C088BC06E3	TCGA-55-8205	22	30			0	495	Lung Adenocarcinoma			YES			NO	0EC532F2-24B1-4F75-B96D-86CC77863AC1	Scheduled Follow-up Submission	Progressive Disease	No	YES		YES	NO		Central Lung	NO	12	4	YES	30	Yes, History of Prior Malignancy	M0	N0	T2b	8205		WITH TUMOR			YES
TCGA-93-7348-01A					75		166.67.0	Nationwide Children's Hospital	TCGA-93-7348-F18347	9b7a6ba2-fb2c-4500-8854-b49be293dec9	TCGA-93-7348	22	14			0		Lung Adenocarcinoma		0	NO			NO	79B49F21-E18B-407C-A5A8-CE49B6D99705	Scheduled Follow-up Submission	Complete Remission/Response	No	YES	100	NO			Central Lung		12	11	NO	42	No	MX	N0	T1a	7348	Other	TUMOR FREE			NO
TCGA-95-7947-01A					67		204.62.0	Nationwide Children's Hospital	TCGA-95-7947-F29538	B3F9AD18-04AD-45A3-8BF2-D7B6E98FFF80	TCGA-95-7947	22	22			0		Lung Adenocarcinoma							91E61F59-FEB2-4144-A762-FDC64CDBAB64	Scheduled Follow-up Submission		No	YES							12	3	NO	100	Yes	M0	N0	T1a	7947				37	NO
TCGA-97-A4M3-01A	NO	NO			69		264.60.0	Nationwide Children's Hospital	TCGA-97-A4M3-F57436	F59A23A0-77D8-4C10-B37D-67549803202E	TCGA-97-A4M3	22	11			0	54	Lung Adenocarcinoma	106	1	NO			NO	12D43060-E9A8-488C-B633-72B730C0CA29	Scheduled Follow-up Submission	Complete Remission/Response	No	YES		YES	NO			NO	12	3	YES	37.5	Yes, History of Prior Malignancy	M0	N0	T1b	A4M3	Other	TUMOR FREE	69	73	NO
TCGA-97-8171-01A	YES	NO		YES	81	RUL and RML	222.60.0	Nationwide Children's Hospital	TCGA-97-8171-F44232	98AD8302-28ED-452F-8867-B5A52BF7A2EE	TCGA-97-8171	22	19		441	0	441	Lung Adenocarcinoma	110		YES	Exon 19 Deletion		NO	7240802C-D844-42BA-9289-7124F67D3732	Scheduled Follow-up Submission	Progressive Disease	No	YES		YES	NO			NO	12	6	YES	65	No	M1a	N2	T2a	8171		WITH TUMOR	55	104	YES
TCGA-64-1676-01A					58		37.77.0	Nationwide Children's Hospital	TCGA-64-1676-F4366	d70bd353-950d-4da4-b04a-934497c1974a	TCGA-64-1676	22	15			0		Lung Adenocarcinoma							5AA8A810-C951-40AF-A664-2048FF522F80		Complete Remission/Response	No	YES					Central Lung		12	11	NO	60	No	M0	N0	T1a	1676		TUMOR FREE			NO
TCGA-86-A4P8-01A					59		264.60.0	Nationwide Children's Hospital	TCGA-86-A4P8-F48289	34D83F16-C390-4C4F-882D-B34483F55C29	TCGA-86-A4P8	22	11			0		Lung Adenocarcinoma	85	0	YES		FISH	YES	8AF601B8-000B-4A83-8639-4B090B0CBD8D	Scheduled Follow-up Submission	Complete Remission/Response	No	YES		NO				NO	12	9	NO		No	MX	N2	T1b	A4P8	Post-Adjuvant Therapy	TUMOR FREE	78	89	YES
TCGA-49-6767-01A					46		144.70.0	Nationwide Children's Hospital	TCGA-49-6767-F58822	DC7C7640-FF2D-4F4E-8220-4EFFAD635D0E	TCGA-49-6767	22	24			0		Lung Adenocarcinoma							A11E7E43-C80B-411A-885F-947BC8949EDE	Scheduled Follow-up Submission		No	YES						NO	12	4		30	No	MX	N0	T3	6767
TCGA-35-5375-01A					61		84.73.0	Nationwide Children's Hospital	TCGA-35-5375-F68920	8B27426D-4A36-4ED5-82E4-1622898D6E17	TCGA-35-5375	22	24			0		Lung Adenocarcinoma							DD6E0EE0-DE71-4D78-9ED5-BF1B24524E4D	Scheduled Follow-up Submission		No	YES					Peripheral Lung	YES	12	8		35	No	M0	N2	T2	5375
TCGA-38-4628-01A	YES	NO	NO	YES	65		58.77.0	Nationwide Children's Hospital	TCGA-38-4628-F4676	cca64327-9837-4503-abfd-9e6ab40ff8dc	TCGA-38-4628	22	9		1118	0	1083	Lung Adenocarcinoma	72		NO			NO	3534A643-AAC7-40D9-BFAE-431F275C6D11		Stable Disease	No	YES		NO			Central Lung		12	12	YES		No	M0	N1	T2	4628		WITH TUMOR	78	85	NO
TCGA-50-7109-01A	NO	NO	NO	NO	60		166.67.0	Nationwide Children's Hospital	TCGA-50-7109-F44136	DE5C9A3D-232A-4614-AA6C-B1156B85E208	TCGA-50-7109	22	13			0	15	Lung Adenocarcinoma							45FFE57A-CBBD-4F6C-9A6B-E049B34FF64D	Scheduled Follow-up Submission	Progressive Disease	No	YES						NO	12	6	YES	120	No	M0	N0	T1	7109		WITH TUMOR			NO
TCGA-44-2662-01A	YES	YES	NO	NO	65		37.77.0	Nationwide Children's Hospital	TCGA-44-2662-F5032	b2f9a164-783a-4a61-ba4e-eab35f83bab7	TCGA-44-2662	22	21			0	245	Lung Adenocarcinoma	78	1					C1468F84-B125-4A52-8742-7FE8A481C6D0		Partial Remission/Response	No	YES		NO					12	10	YES	56	Yes	M0	N0	T2	2662	Post-Adjuvant Therapy		94	73	YES
TCGA-44-2662-01B	YES	YES	NO	NO	65		37.77.0	Nationwide Children's Hospital	TCGA-44-2662-F5032	b2f9a164-783a-4a61-ba4e-eab35f83bab7	TCGA-44-2662	22	21			0	245	Lung Adenocarcinoma	78	1					C1468F84-B125-4A52-8742-7FE8A481C6D0		Partial Remission/Response	No	YES		NO					12	10	YES	56	Yes	M0	N0	T2	2662	Post-Adjuvant Therapy		94	73	YES
TCGA-55-7227-01A	YES	NO	NO		77		166.67.0	Nationwide Children's Hospital	TCGA-55-7227-F65704	3B44DFC4-EC36-4F1D-837D-6297BF49D8AF	TCGA-55-7227	22	26			0	255	Lung Adenocarcinoma							32DB2D03-157A-4B4E-8240-A7626AA7E140	Scheduled Follow-up Submission	Progressive Disease	No	YES						NO	12	9	YES		No	MX	N1	T3	7227		WITH TUMOR			NO
TCGA-55-A4DF-01A	NO	YES	NO	NO	88		258.59.0	Nationwide Children's Hospital	TCGA-55-A4DF-F59072	B4A1C81E-113A-41E4-8C10-FEFA43BCB273	TCGA-55-A4DF	22	30			0	440	Lung Adenocarcinoma	82						37646DE7-9805-4570-B137-BF05F4F862E1	Scheduled Follow-up Submission	Progressive Disease	No	YES						NO	12	4	YES	60	Yes, History of Synchronous/Bilateral Malignancy	MX	N0	T1b	A4DF		WITH TUMOR		58	NO
TCGA-49-6744-01A					64		144.70.0	Nationwide Children's Hospital	TCGA-49-6744-F14923	1841d2d6-26a6-417f-b575-0af2e3d8ca1a	TCGA-49-6744	22	10			0		Lung Adenocarcinoma							E4849CD1-90BC-4C26-9D2F-1B2F71546391		Complete Remission/Response	No	YES		YES	YES				12	8	NO	20	No	MX	N1	T2a	6744		TUMOR FREE			YES
TCGA-44-2668-01A					51		37.77.0	Nationwide Children's Hospital	TCGA-44-2668-F5041	5510cceb-3418-48f7-870a-01d65ebd2f55	TCGA-44-2668	22	22			0		Lung Adenocarcinoma	53	0					FAC2D7F9-34E4-4B2C-8989-20CE1ABD14BE		Complete Remission/Response	No	YES		NO					12	10	NO	60	No	M0	N0	T2	2668		TUMOR FREE			NO
TCGA-44-2668-01B					51		37.77.0	Nationwide Children's Hospital	TCGA-44-2668-F5041	5510cceb-3418-48f7-870a-01d65ebd2f55	TCGA-44-2668	22	22			0		Lung Adenocarcinoma	53	0					FAC2D7F9-34E4-4B2C-8989-20CE1ABD14BE		Complete Remission/Response	No	YES		NO					12	10	NO	60	No	M0	N0	T2	2668		TUMOR FREE			NO
TCGA-97-8177-01A					59		222.60.0	Nationwide Children's Hospital	TCGA-97-8177-F44243	76A1E7C1-9C2C-4E07-A5AA-389AA2168572	TCGA-97-8177	22	19			0		Lung Adenocarcinoma	97		YES	L858R		NO	D8138437-C5E7-4054-8A43-AA7C10FA46F5	Scheduled Follow-up Submission	Complete Remission/Response	No	YES		YES	NO			NO	12	6	NO		No	M0	N0	T2a	8177		TUMOR FREE	82	109	YES
TCGA-55-6978-01A	NO	YES	NO	NO	81		160.69.0	Nationwide Children's Hospital	TCGA-55-6978-F45607	503F8882-F797-4D4A-86CC-4FD93814BA3C	TCGA-55-6978	22	17			0	42	Lung Adenocarcinoma			NO			NO	6B6E7911-D891-4B20-A493-BEE47DECD298	Scheduled Follow-up Submission	Progressive Disease	No	YES		NO				NO	12	7	YES		Yes	MX	N0	T2b	6978		WITH TUMOR			NO
TCGA-50-5055-01A	YES	YES	YES	NO	79		84.73.0	Nationwide Children's Hospital	TCGA-50-5055-F32023	b971489c-681a-4176-861a-5190efe60761	TCGA-50-5055	22	15	792		0	771	Lung Adenocarcinoma			YES				30C8A482-6125-4BBD-B7F5-A3126E14CDE0	Scheduled Follow-up Submission	Progressive Disease	No	YES		YES	NO			NO	12	5	YES		No	M0	N1	T1	5055		WITH TUMOR			NO
TCGA-55-A57B-01A					80		406.37.0	Nationwide Children's Hospital	TCGA-55-A57B-F60133	828E9149-B556-4073-8F6B-55F1F065F37C	TCGA-55-A57B	22	29			0		Lung Adenocarcinoma	77		NO			NO	E78F0E39-B938-43EA-8100-57C76211F14F	Scheduled Follow-up Submission	Complete Remission/Response	No	YES		NO			Peripheral Lung	NO	12	5	NO		No	M0	N0	T1b	A57B		TUMOR FREE			NO
TCGA-44-2659-01A					65		37.77.0	Nationwide Children's Hospital	TCGA-44-2659-F5024	075c8c08-1113-488d-9a27-0bfe68135696	TCGA-44-2659	22	20			0		Lung Adenocarcinoma	67	1					16D38D0A-60D6-4D15-AE78-9E30D3144FC5		Complete Remission/Response	No	YES		NO					12	10	NO	57	No	M0	N1	T1	2659	Adjuvant therapy	TUMOR FREE	87	73	YES
TCGA-38-4631-01A	NO	YES	NO	NO	72		119.76.0	Nationwide Children's Hospital	TCGA-38-4631-F4892	48e7462e-19a5-4897-9104-e131fa220329	TCGA-38-4631	22	14			0		Lung Adenocarcinoma			NO			NO	6DB0FB9B-C7F7-482A-AF5B-4D1735884BFC			No	YES		NO			Peripheral Lung		12	12	YES	40	Yes	M0	N0	T2	4631		WITH TUMOR			NO
TCGA-MP-A4TF-01A					58		278.56.0	Nationwide Children's Hospital			TCGA-MP-A4TF	22				0		Lung Adenocarcinoma	77		NO			NO	639524C0-A4BB-4911-B197-833F0C196FBA			No	YES		NO			Peripheral Lung		12			40	No	M0	N0	T2b	A4TF				108
TCGA-69-7760-01A					73		196.64.0	Nationwide Children's Hospital	TCGA-69-7760-F29247	58e0fa1d-b060-47b2-808b-631e2c8d3b82	TCGA-69-7760	22	13			0		Lung Adenocarcinoma	125		YES			NO	5AA39C84-9330-440C-947D-352A8754B8E1	Scheduled Follow-up Submission		No	YES		NO			Peripheral Lung		12	3	NO		No	M0	N0	T3	7760	Post-Adjuvant Therapy	TUMOR FREE			YES
TCGA-50-8460-01A					74		232.55.0	Nationwide Children's Hospital	TCGA-50-8460-F69335	D2F418F0-13A0-45DB-B9B4-F1D07DFA9D55	TCGA-50-8460	22	5			0		Lung Adenocarcinoma			YES				E3A517C8-2B49-49AC-AC91-324DF2F91EE5	Scheduled Follow-up Submission	Complete Remission/Response	No	YES		YES	NO			NO	12	1	NO		No	M0	N0	T1a	8460		TUMOR FREE			NO
TCGA-L9-A50W-01A	NO	NO	NO	NO	75		406.37.0	Nationwide Children's Hospital	TCGA-L9-A50W-F50396	F09EA740-220C-4B79-BDA9-418554DFD3D0	TCGA-L9-A50W	22	23			0	389	Lung Adenocarcinoma		0	YES	T790M	FISH	YES	2D964DA1-6D43-45E8-9215-706CB476465B	Scheduled Follow-up Submission	Progressive Disease	No	YES		NO				NO	12	10	YES	19	No	MX	N1	T1b	A50W	Preoperative	WITH TUMOR			NO
TCGA-86-A456-01A					78		258.59.0	Nationwide Children's Hospital	TCGA-86-A456-F46034	7603E36B-91F1-4DD6-9E6D-EFE55834CFAB	TCGA-86-A456	22	29			0		Lung Adenocarcinoma		1					E7B43133-EC6F-4B17-8F3E-DA85B9D31A11	Scheduled Follow-up Submission	Complete Remission/Response	No	YES	90				Peripheral Lung	NO	12	7	NO		No	M0	N0	T1a	A456	Post-Adjuvant Therapy	TUMOR FREE
TCGA-91-6840-01A					59		160.69.0	Nationwide Children's Hospital	TCGA-91-6840-F21664	733715F8-948C-4764-9C90-5A5A19666BC2	TCGA-91-6840	22	8			0		Lung Adenocarcinoma							D8A22193-6277-4120-A6BC-E9D20B8F9489	Scheduled Follow-up Submission		No	YES		NO					12	5	NO	50	No	M0	N0	T1b	6840		TUMOR FREE			NO
TCGA-49-AARN-01A					56		423.36.0	Nationwide Children's Hospital			TCGA-49-AARN	22				0		Lung Adenocarcinoma	110.6						FADF9782-3B0C-4A94-B439-B6CAAE85CFEB			No	YES							12				Yes, History of Synchronous/Bilateral Malignancy	MX	N0	T1	AARN			85.9	101.1
TCGA-MP-A4T6-01A					76		278.56.0	Nationwide Children's Hospital			TCGA-MP-A4T6	22				0		Lung Adenocarcinoma	63		NO			NO	B6F8ED93-C98D-4660-B90B-AE3A296FC6DB			No	YES		NO			Peripheral Lung		12			50	No	MX	N2	T1	A4T6				79
TCGA-44-6146-01A					64		119.76.0	Nationwide Children's Hospital	TCGA-44-6146-F12758	37ef67dc-0389-44bd-9265-02d220a94c2f	TCGA-44-6146	22	7			0		Lung Adenocarcinoma	76	1					5453F22B-5C02-49EF-A3F0-0D74CA595134			No	YES							12	6		15	Yes	M0	N0	T3	6146	Adjuvant therapy	TUMOR FREE	95	94	YES
TCGA-44-6146-01B					64		119.76.0	Nationwide Children's Hospital	TCGA-44-6146-F12758	37ef67dc-0389-44bd-9265-02d220a94c2f	TCGA-44-6146	22	7			0		Lung Adenocarcinoma	76	1					5453F22B-5C02-49EF-A3F0-0D74CA595134			No	YES							12	6		15	Yes	M0	N0	T3	6146	Adjuvant therapy	TUMOR FREE	95	94	YES
TCGA-91-8497-01A					75		238.60.0	Nationwide Children's Hospital	TCGA-91-8497-F58334	4D8EEDE1-07CE-42E8-89C1-747366728090	TCGA-91-8497	22	7			0		Lung Adenocarcinoma							4A361F27-619E-4EB8-9390-DA957C5E018D	Scheduled Follow-up Submission	Complete Remission/Response	No	YES		NO				NO	12	4	NO		No	MX	N0	T1a	8497		TUMOR FREE			NO
TCGA-44-3398-01A					77		52.74.0	Nationwide Children's Hospital	TCGA-44-3398-F5292	b338b0a9-78f2-44d5-a19c-5beca343abd0	TCGA-44-3398	22	11			0		Lung Adenocarcinoma	60						F064A38F-C337-4479-952C-64FCB4A1884A		Complete Remission/Response	No	YES		NO					12	10	NO	60	No	M0	N0	T1b	3398		TUMOR FREE	89	96	NO
TCGA-97-A4M7-01A					74		264.60.0	Nationwide Children's Hospital	TCGA-97-A4M7-F57383	FF856855-D4FF-4537-86B6-C69C98F1AA5C	TCGA-97-A4M7	22	10			0		Lung Adenocarcinoma	99	0	YES	L858R		NO	D260FE63-A7B6-43D6-B912-ABC8DDC6030E	Scheduled Follow-up Submission	Complete Remission/Response	No	YES		YES	NO			NO	12	3	NO	40	Yes, History of Synchronous/Bilateral Malignancy	M0	N0	T1b	A4M7	Other	TUMOR FREE	82	101	NO
TCGA-55-7576-01A					54		183.66.0	Nationwide Children's Hospital	TCGA-55-7576-F45603	062163B2-5EE5-4AC5-A2C1-AF02D4B0CD90	TCGA-55-7576	22	17			0		Lung Adenocarcinoma							5FBB5889-635B-4824-BE97-5AEB0CB64BAA	Scheduled Follow-up Submission	Complete Remission/Response	No	YES						NO	12	7	NO		No	M0	N0	T2a	7576		TUMOR FREE			YES
TCGA-55-1592-01A	NO	NO	NO	NO	65		37.77.0	Nationwide Children's Hospital	TCGA-55-1592-F9167	d1fe03fa-cf81-4ff3-beb4-aaeb15b9e6ae	TCGA-55-1592	22	15			0	452	Lung Adenocarcinoma							5180A5CA-C51B-4F8B-B7F6-1DE8CFC0ECE3		Progressive Disease	No	YES							12	3	YES		Yes	M0	N0	T2	1592		WITH TUMOR			NO
TCGA-78-7163-01A					60		183.66.0	Nationwide Children's Hospital	TCGA-78-7163-F16824	18ffcd96-26be-4690-8195-11c72cba0f56	TCGA-78-7163	22	27			0		Lung Adenocarcinoma			NO			NO	ED6983DC-029A-46FE-B949-90412E2A95A8	Scheduled Follow-up Submission	Complete Remission/Response	No	YES		NO			Peripheral Lung		12	9	NO	41	No	M0	N0	T2	7163		TUMOR FREE			NO
TCGA-64-1680-01A					63		37.77.0	Nationwide Children's Hospital	TCGA-64-1680-F4387	509d68b7-f334-42a9-962b-b7ff425bab81	TCGA-64-1680	22	16			0		Lung Adenocarcinoma							713DE7CF-AFC2-4C52-A2E9-D6F0AC498B04			No	YES							12	11	NO	50	No	M1	N2	T2a	1680		TUMOR FREE			YES
TCGA-49-4487-01A	NO	YES	YES	YES	72		144.70.0	Nationwide Children's Hospital	TCGA-49-4487-F14693	c1cdbc66-08a8-47a7-906e-949c08e2bbfc	TCGA-49-4487	22	9	697	712	0	697	Lung Adenocarcinoma							6014289D-7A9E-4BB1-A916-B35BF51E04F0	Scheduled Follow-up Submission	Progressive Disease	No	YES							12	8	YES	40	No	M0	N0	T1	4487		WITH TUMOR			NO
TCGA-75-5122-01A	NO	NO		NO			119.76.0	Nationwide Children's Hospital	TCGA-75-5122-F11750	ded07f2c-1693-4ffa-b33d-e4c0e47bc2f2	TCGA-75-5122	22	31					Lung Adenocarcinoma			NO			NO	9A2CBFE4-3A4E-4030-B9C5-B512148BDD78		Progressive Disease	No	YES	0	NO			Peripheral Lung		12	3	YES	20	No	M0	N0	T2	5122	Adjuvant therapy	WITH TUMOR			NO
TCGA-44-3918-01A	NO	NO	NO	NO	60		52.74.0	Nationwide Children's Hospital	TCGA-44-3918-F5231	439f02a5-f262-430e-8cda-1308ad6cbb3d	TCGA-44-3918	22	8			0		Lung Adenocarcinoma	76						47658B7A-0B30-44F4-A8C0-82A291CC9AB3		Complete Remission/Response	No	YES		NO					12	10	NO	20	No	M0	N0	T1	3918		TUMOR FREE			NO
TCGA-44-3918-01B	NO	NO	NO	NO	60		52.74.0	Nationwide Children's Hospital	TCGA-44-3918-F5231	439f02a5-f262-430e-8cda-1308ad6cbb3d	TCGA-44-3918	22	8			0		Lung Adenocarcinoma	76						47658B7A-0B30-44F4-A8C0-82A291CC9AB3		Complete Remission/Response	No	YES		NO					12	10	NO	20	No	M0	N0	T1	3918		TUMOR FREE			NO
TCGA-80-5611-01A							84.73.0	Nationwide Children's Hospital	TCGA-80-5611-F15076	468f2750-4845-4353-9dbb-ff8f8555652f	TCGA-80-5611	22	26					Lung Adenocarcinoma		0					248D08C2-6E7C-4CD8-B433-ED9655B0398A			No	YES					Peripheral Lung		12	7	NO	60	Yes	M0	N0	T2	5611		TUMOR FREE			NO
TCGA-05-4389-01A					70		58.77.0	Nationwide Children's Hospital	TCGA-05-4389-F36455	A2734A4F-5C1D-4D7B-B01D-01305FF9E917	TCGA-05-4389	22	31			0		Lung Adenocarcinoma							054ECF3E-EED9-4AB2-AE3D-47CC70EDC6CA	Scheduled Follow-up Submission	Complete Remission/Response	No	YES						NO	12	10	NO	43	No	M0	N0	T1	4389		TUMOR FREE			NO
TCGA-78-7536-01A	NO	NO	NO	NO	69		183.66.0	Nationwide Children's Hospital	TCGA-78-7536-F20631	01b8e373-4376-4322-8924-06beb651d367	TCGA-78-7536	22	19			0	231	Lung Adenocarcinoma			NO			NO	F97826F4-5D4F-4835-96CD-B5181F117C55	Scheduled Follow-up Submission	Progressive Disease	No	YES		NO					12	1	YES	44	No	M0	N2	T2	7536		WITH TUMOR			NO
TCGA-L4-A4E6-01A					67		258.59.0	Nationwide Children's Hospital	TCGA-L4-A4E6-F51277	4A1DF958-C4FC-4CEB-B14F-05210285715F	TCGA-L4-A4E6	22	14			0		Lung Adenocarcinoma	98		NO			NO	C7C82BDB-B6B1-400E-82FD-BBAB976772E6	Scheduled Follow-up Submission	Complete Remission/Response	No	YES		NO			Peripheral Lung	NO	12	11	NO	30	No	M0	N0	T1	A4E6		TUMOR FREE	82	85	NO
TCGA-86-8075-01A	YES	NO	NO	NO	66		213.60.0	Nationwide Children's Hospital	TCGA-86-8075-F41679	686D13D9-B93A-4157-9E8D-B441EA26F6D0	TCGA-86-8075	22	25			0	199	Lung Adenocarcinoma		1	NO			NO	16050C40-30CA-4788-A5B8-5AFD8313B787	Scheduled Follow-up Submission		No	YES	90	NO			Peripheral Lung	NO	12	3	YES		No	M0	N0	T2	8075	Pre-Adjuvant Therapy	TUMOR FREE			NO
TCGA-86-8674-01A	NO	NO	NO		50		238.60.0	Nationwide Children's Hospital	TCGA-86-8674-F42027	5B567A02-6171-4C9E-ACB9-E6DBF6EEA647	TCGA-86-8674	22	9			0	334	Lung Adenocarcinoma							F756338F-1247-470D-9A9B-90A7CB902D87	Scheduled Follow-up Submission	Progressive Disease	No	YES					Peripheral Lung	NO	12	4	YES	37.5	No	M0	N1	T2a	8674		WITH TUMOR			YES
TCGA-55-8512-01A					41		238.60.0	Nationwide Children's Hospital	TCGA-55-8512-F64286	C86A17B3-ACBB-498F-8D5F-5A2A4EE2A07A	TCGA-55-8512	22	28			0		Lung Adenocarcinoma							B0657990-7D50-41EF-AC64-E440AB0CFFBD	Scheduled Follow-up Submission	Progressive Disease	No	YES						NO	12	8	NO	19	No	M1b	N1	T1a	8512		WITH TUMOR			NO
TCGA-50-5944-01A					69		119.76.0	Nationwide Children's Hospital	TCGA-50-5944-F32136	974a8262-421f-448c-805e-b4553844dc24	TCGA-50-5944	22	17			0		Lung Adenocarcinoma							C0E15CA2-6C73-4CEA-A6E7-B5D4FBE40210	Scheduled Follow-up Submission	Complete Remission/Response	No	YES						NO	12	5	NO		No	M0	N0	T1	5944		TUMOR FREE			NO
TCGA-49-6742-01A	YES	NO	NO	YES	70		144.70.0	Nationwide Children's Hospital	TCGA-49-6742-F14741	e6565afe-c87f-4fa9-94e1-29b1e25d0ab8	TCGA-49-6742	22	9		214	0	214	Lung Adenocarcinoma							AE3149D1-0E57-464F-8853-291C4FC31DA0	Scheduled Follow-up Submission		No	YES		YES	NO				12	8	YES	10	Yes	M0	N1	T2a	6742		WITH TUMOR			YES
TCGA-J2-8194-01A	YES	NO	NO	YES	69		213.60.0	Nationwide Children's Hospital	TCGA-J2-8194-F55317	CCFB27C8-26F9-4711-BDF0-683C72901DE8	TCGA-J2-8194	22	3		518	0	470	Lung Adenocarcinoma	59						7C612361-5ECC-4061-B430-FCF3AF47D1E2	Scheduled Follow-up Submission	Partial Remission/Response	No	YES						NO	12	1	YES	20	Yes, History of Prior Malignancy	MX	N0	T3	8194		WITH TUMOR	2.04	83	YES
TCGA-35-4122-01A					69		52.74.0	Nationwide Children's Hospital	TCGA-35-4122-F68915	38E92345-0056-4825-BE80-B4E43166B1D2	TCGA-35-4122	22	23			0		Lung Adenocarcinoma			NO			NO	DEB1C9F1-3C77-4C35-9C6E-D737670992E5	Scheduled Follow-up Submission		No	YES		NO			Peripheral Lung	YES	12	12		45	No	M0	N0	T1	4122
TCGA-99-8033-01A					74		213.60.0	Nationwide Children's Hospital	TCGA-99-8033-F58623	D7BC0D18-7B7D-4404-86A3-C62CB2474F57	TCGA-99-8033	22	30			0		Lung Adenocarcinoma		2	YES			NO	85D210D1-44A9-4DD2-A19D-676A9D822B86	Scheduled Follow-up Submission		No	YES		YES	NO		Peripheral Lung	NO	12	3	NO		No	M1	NX	TX	8033	Post-Adjuvant Therapy	WITH TUMOR			YES
TCGA-78-7152-01A		YES	NO	NO	65		166.67.0	Nationwide Children's Hospital	TCGA-78-7152-F16986	37c9fd67-631d-4341-998d-1c995eaa7999	TCGA-78-7152	22	29			0	1202	Lung Adenocarcinoma		3	NO			NO	2E645531-D010-496E-B785-A82E613400B5	Scheduled Follow-up Submission		No	YES		NO			Peripheral Lung		12	9	YES	40	No	M0	N0	T2	7152	Other	WITH TUMOR			NO
TCGA-55-6712-01A					71		144.70.0	Nationwide Children's Hospital	TCGA-55-6712-F46639	635BF546-710A-4C39-9D56-E3D0FCFBC9F6	TCGA-55-6712	22	13			0		Lung Adenocarcinoma							9A411DE8-F45F-42E6-8E03-5D880B89B9EF	Scheduled Follow-up Submission	Progressive Disease	No	YES						NO	12	8	NO		No	MX	N1	T2a	6712		WITH TUMOR			YES
TCGA-95-8039-01A					72		213.60.0	Nationwide Children's Hospital	TCGA-95-8039-F33080	748F6706-9CBF-4D1F-A596-95427E569680	TCGA-95-8039	22	20			0		Lung Adenocarcinoma	98						3775EEDC-EA19-456C-9E63-41AC52919D63	Scheduled Follow-up Submission		No	YES						NO	12	6	NO		No	MX	N0	T1	8039		TUMOR FREE	70	2.54	NO
TCGA-55-8087-01A					59		213.60.0	Nationwide Children's Hospital	TCGA-55-8087-F47822	7E1BBF1B-2639-4442-A633-A2B9D0B088C9	TCGA-55-8087	22	28			0		Lung Adenocarcinoma	142		NO			NO	D6DFAAF2-7B6C-496B-8EEB-DA003614B0B8	Scheduled Follow-up Submission	Complete Remission/Response	No	YES		NO				NO	12	8	NO		No	MX	N0	T2a	8087		TUMOR FREE			NO
TCGA-62-A46R-01A					54		258.59.0	Nationwide Children's Hospital			TCGA-62-A46R	22				0		Lung Adenocarcinoma			NO			NO	1A040947-95DD-491B-85F8-94D7820E6C08			No	YES		NO			Central Lung		12			25	No	M0	N0	T2	A46R
TCGA-55-7724-01A					76		196.64.0	Nationwide Children's Hospital	TCGA-55-7724-F56186	519BD0D9-C612-41B2-A0ED-177FDA150DFD	TCGA-55-7724	22	29			0		Lung Adenocarcinoma	49						B1BC5DE4-33A2-47B6-BF22-D12A75890F97	Scheduled Follow-up Submission	Complete Remission/Response	No	YES						NO	12	1	NO	50	Yes	MX	N0	T2a	7724		TUMOR FREE			NO
TCGA-L4-A4E5-01A					48		264.60.0	Nationwide Children's Hospital	TCGA-L4-A4E5-F49031	DC4F62D9-03A2-4A06-A9B0-89FCCD37B4FB	TCGA-L4-A4E5	22	25			0		Lung Adenocarcinoma	93	1	NO			NO	9527D96B-C24A-4274-920A-89C81C5EF5F9	Scheduled Follow-up Submission	Complete Remission/Response	No	YES		NO			Central Lung	NO	12	9	NO	33	No	M0	N0	T1	A4E5	Other	TUMOR FREE	94	82	NO
TCGA-62-8402-01A	YES	YES		NO	73		232.55.0	Nationwide Children's Hospital	TCGA-62-8402-F52547	08295B1A-EE42-42DD-9431-741E62382F2E	TCGA-62-8402	22	4			0	772	Lung Adenocarcinoma		0	YES	Exon 19 Deletion		NO	13C32FC7-198F-45F6-BC30-D167596BBC4E	Scheduled Follow-up Submission	Progressive Disease	No	YES	100	NO			Peripheral Lung	NO	12	12	YES		No	M0	N2	T2	8402	Preoperative	WITH TUMOR			NO
TCGA-95-A4VK-01A	NO	YES		NO	74		278.56.0	Nationwide Children's Hospital	TCGA-95-A4VK-F58477	7505B09D-6FAB-4A2B-9EA8-7146661CF8D2	TCGA-95-A4VK	22	10			0	496	Lung Adenocarcinoma	81	1	YES			NO	9F6DB980-0088-48E7-8531-E72F6E754A8B	Scheduled Follow-up Submission	Stable Disease	No	YES		NO				NO	12	4	YES	45	Yes, History of Prior Malignancy	M0	N2	T2b	A4VK	Post-Adjuvant Therapy	WITH TUMOR	72	99	YES
TCGA-NJ-A55O-01A					56		278.56.0	Nationwide Children's Hospital	TCGA-NJ-A55O-F50898	FFE4E344-2FBF-47D2-A1D5-8C91E9F635EC	TCGA-NJ-A55O	22	1			0		Lung Adenocarcinoma			NO			NO	4B943855-70D2-40F8-B4B5-A0A6CFD2B53D	Scheduled Follow-up Submission	Stable Disease	No	YES		NO				YES	12	11	NO	30	No	M0	N1	T1b	A55O					NO
TCGA-49-6745-01A					82		144.70.0	Nationwide Children's Hospital	TCGA-49-6745-F15015	47cc0678-9e26-4402-8fcf-1e549c6cf16d	TCGA-49-6745	22	11			0		Lung Adenocarcinoma			YES				48CC69C5-7F68-4E7E-83CF-E4748AE5A2B4	Scheduled Follow-up Submission		No	YES		YES	NO				12	8	NO	20	Yes	M0	N2	T2a	6745		TUMOR FREE			YES
TCGA-78-7147-01A	NO	NO	NO	NO	67		166.67.0	Nationwide Children's Hospital	TCGA-78-7147-F16971	a52cbdf4-8abe-4493-9575-72d42251aea8	TCGA-78-7147	22	28			0	578	Lung Adenocarcinoma			NO			NO	4333D60B-0E54-481F-912D-13E0ED508674	Scheduled Follow-up Submission	Progressive Disease	No	YES		NO			Peripheral Lung		12	9	YES	50	No	M0	N1	T2	7147		WITH TUMOR			NO
TCGA-NJ-A4YF-01A					50		278.56.0	Nationwide Children's Hospital	TCGA-NJ-A4YF-F50858	635C2793-F06E-4540-80A4-D9F2C1D72DFB	TCGA-NJ-A4YF	22	1			0		Lung Adenocarcinoma	77.5		NO			NO	D1C60CC1-CA6C-431A-903F-D0C3844901B9	Scheduled Follow-up Submission	Stable Disease	No	YES		NO				NO	12	11	NO	30	No	M0	N0	T1	A4YF		TUMOR FREE	95.1	83.9	NO
TCGA-78-7539-01A					75		183.66.0	Nationwide Children's Hospital	TCGA-78-7539-F20643	e53bcc72-3116-4b4d-a4d9-712dab94cf72	TCGA-78-7539	22	19			0		Lung Adenocarcinoma			NO			NO	BB20951A-80F9-42E4-B3CF-7C06F39DAAE4	Scheduled Follow-up Submission		No	YES		NO					12	1		2.2	No	M0	N0	T2b	7539					YES
TCGA-49-6743-01A					81		144.70.0	Nationwide Children's Hospital	TCGA-49-6743-F14858	cd1e65ca-466c-495d-b733-aac17946d06a	TCGA-49-6743	22	10			0		Lung Adenocarcinoma							8847A037-7E03-4BCE-AC12-18313BF328C3	Scheduled Follow-up Submission	Complete Remission/Response	No	YES							12	8	NO	50	No	MX	N2	T1	6743		TUMOR FREE			YES
TCGA-55-A48X-01A	YES	NO	YES		63		258.59.0	Nationwide Children's Hospital	TCGA-55-A48X-F61500	9BD03D83-FD93-44FB-AFAF-230675A93AAA	TCGA-55-A48X	22	30	615		0	615	Lung Adenocarcinoma	79						1619C4A1-1D24-49AF-8249-8703CBEB61EE	Scheduled Follow-up Submission	Complete Remission/Response	No	YES						NO	12	6	YES	36	Yes, History of Prior Malignancy	M0	N1	T1b	A48X		TUMOR FREE			YES
TCGA-55-8505-01A					62		238.60.0	Nationwide Children's Hospital	TCGA-55-8505-F47798	20147D1C-C4BA-40AF-9FF7-4122FAA97854	TCGA-55-8505	22	28			0		Lung Adenocarcinoma							4CC51313-E245-4C07-8F5D-E788D1D3F748	Scheduled Follow-up Submission	Complete Remission/Response	No	YES						NO	12	8	NO		No	MX	N2	T1a	8505		TUMOR FREE			YES
TCGA-MN-A4N4-01A					57		264.60.0	Nationwide Children's Hospital	TCGA-MN-A4N4-F56667	6E245328-C4AD-4FC6-BC4E-0967868C7228	TCGA-MN-A4N4	22	17			0		Lung Adenocarcinoma			NO			NO	22F463D5-E0D2-4A77-B965-B7A13CB93795	Scheduled Follow-up Submission	Complete Remission/Response	No	YES		NO				NO	12	2	NO		No	M0	N0	T1b	A4N4		TUMOR FREE	75	82	NO
TCGA-05-4397-01A					65		58.77.0	Nationwide Children's Hospital			TCGA-05-4397	22				0		Lung Adenocarcinoma							829A0D22-BB1A-4508-BBC2-77D9A6955FF2			No	YES							12			45	No	M0	N1	T2	4397
TCGA-44-7670-01A					47		183.66.0	Nationwide Children's Hospital	TCGA-44-7670-F20714	58360ec4-71c7-4e83-bec3-c8948c4dcff4	TCGA-44-7670	22	19			0		Lung Adenocarcinoma	50						4A2FB4FC-552A-4CB3-8519-AC5AA174C038	Scheduled Follow-up Submission	Complete Remission/Response	No	YES							12	1	NO	30	Yes	M0	N1	T1b	7670		TUMOR FREE	90	82	YES
TCGA-49-4505-01A					61		58.77.0	Nationwide Children's Hospital	TCGA-49-4505-F58844	7535318E-69AD-45DE-A08C-DB0184BC487D	TCGA-49-4505	22	25			0	417	Lung Adenocarcinoma		1					64F1AC6C-38F2-4E04-B830-EE16781CA380	Scheduled Follow-up Submission		No	YES	80					NO	12	4	YES	74	No	M0	N1	T2	4505	Preoperative	WITH TUMOR			NO
TCGA-MP-A4TE-01A	YES	NO	NO		56		278.56.0	Nationwide Children's Hospital	TCGA-MP-A4TE-F41404	1239E6E6-49B6-494D-B3DC-33A65B8F4058	TCGA-MP-A4TE	22	18			0	411	Lung Adenocarcinoma			NO			NO	03CA339A-22DB-4E95-A935-59A8C7B61C96	Additional New Tumor Event	Progressive Disease	No	YES		YES	YES	G12C	Peripheral Lung	NO	12	3	YES	40	No	MX	N0	T2b	A4TE		WITH TUMOR			NO
TCGA-62-A46V-01A					78		258.59.0	Nationwide Children's Hospital	TCGA-62-A46V-F51440	58E3C427-7F74-4CC2-9847-DF0700AF43D5	TCGA-62-A46V	22	19			0		Lung Adenocarcinoma			NO			NO	3972C009-B6FE-4621-B33B-768141CC09E1	Scheduled Follow-up Submission	Complete Remission/Response	No	YES	90	NO			Peripheral Lung	NO	12	11	NO		No	M0	N0	T2	A46V	Preoperative	TUMOR FREE			NO
TCGA-69-7765-01A					56		196.64.0	Nationwide Children's Hospital	TCGA-69-7765-F29244	79cba3a7-8b66-4cac-a18e-ebc14740d0d0	TCGA-69-7765	22	13			0		Lung Adenocarcinoma	45		NO	Other		NO	D78E8640-B2BF-4986-92FD-5E2E72730262	Scheduled Follow-up Submission		No	YES		NO			Peripheral Lung		12	3	NO		No	MX	N0	T4	7765					YES
TCGA-86-8076-01A					42		213.60.0	Nationwide Children's Hospital	TCGA-86-8076-F41683	A93C981E-4BCD-444A-889C-3F75CF9D1642	TCGA-86-8076	22	25			0		Lung Adenocarcinoma		2	NO			NO	F065C5AC-B5CB-4CF2-BF22-B9A087AA1E5F	Scheduled Follow-up Submission	Complete Remission/Response	No	YES	80	NO			Peripheral Lung	NO	12	3	NO		No	M0	N0	T1	8076	Preoperative	TUMOR FREE			YES
TCGA-55-8513-01A	YES	NO	NO	NO	77		238.60.0	Nationwide Children's Hospital	TCGA-55-8513-F64283	BED3B17C-69EA-4302-B3E2-D8C6371B867F	TCGA-55-8513	22	28			0	317	Lung Adenocarcinoma	65	2	YES			YES	0CCA7806-C3BB-4424-84BD-6B1E4B7EF335	Scheduled Follow-up Submission	Stable Disease	No	YES	60					NO	12	8	YES		No	MX	N0	T3	8513	Other	WITH TUMOR			NO
TCGA-62-8394-01A					65		232.55.0	Nationwide Children's Hospital			TCGA-62-8394	22				0		Lung Adenocarcinoma			NO			NO	D64B7F84-B398-4D36-8F97-E035CF8C7E86			No	YES		NO			Central Lung		12				No	M0	N2	T4	8394
TCGA-67-6216-01A					57		119.76.0	Nationwide Children's Hospital	TCGA-67-6216-F13587	106303e5-cdb6-4df7-9e15-6f4d77d4dd50	TCGA-67-6216	22	6			0		Lung Adenocarcinoma			NO			NO	C2B95505-50A0-4386-987E-0E8D4ED27A6D	Scheduled Follow-up Submission		No	YES		NO			Central Lung		12	7	NO		No	M0	N0	T1a	6216		TUMOR FREE			NO
TCGA-97-8174-01A					67		222.60.0	Nationwide Children's Hospital			TCGA-97-8174	22				0		Lung Adenocarcinoma	90		YES		FISH	YES	CE4DF113-993B-444F-B413-DBD38FCB9C9D			No	YES		YES	NO				12			40	No	M0	N0	T2b	8174			86	99
TCGA-38-4625-01A					66		58.77.0	Nationwide Children's Hospital	TCGA-38-4625-F4505	3ba4cc67-5bc8-4ad5-a486-601d63f9f7c7	TCGA-38-4625	22	8			0		Lung Adenocarcinoma	68		NO			NO	E3CCF5BA-823F-445A-BF53-1AD1B43CE5D5			No	YES		NO			Peripheral Lung		12	12		50	No	M0	N0	T2a	4625			66	66	NO
TCGA-75-6205-01A	NO	NO	NO	NO			119.76.0	Nationwide Children's Hospital	TCGA-75-6205-F15083	c118a061-f9b0-4470-ba1e-07a472245a8f	TCGA-75-6205	22	21					Lung Adenocarcinoma							6E1E17D6-4FD0-4E65-8FB1-6870EE96F8C4			No	YES					Peripheral Lung		12	7	YES		No	M0	N0	T2a	6205	Adjuvant therapy	WITH TUMOR			NO
TCGA-NJ-A4YI-01A					87		278.56.0	Nationwide Children's Hospital	TCGA-NJ-A4YI-F50887	5768A19F-C788-44AE-9925-B7C2D4F5236D	TCGA-NJ-A4YI	22	1			0		Lung Adenocarcinoma	52						9CA55C05-4C06-4884-911E-90A58E5E1FBE	Scheduled Follow-up Submission	Stable Disease	No	YES						NO	12	11	NO	3	No	M0	N2	T2	A4YI				94	NO
TCGA-NJ-A4YQ-01A					69		278.56.0	Nationwide Children's Hospital	TCGA-NJ-A4YQ-F50895	D75D2FE9-18DE-4D15-B47A-208D923F3550	TCGA-NJ-A4YQ	22	1			0		Lung Adenocarcinoma			NO			NO	7E989533-1C21-404B-90C6-E2B7E2B53297	Scheduled Follow-up Submission	Stable Disease	No	YES		NO				NO	12	11	NO	40	No	M0	N0	T1b	A4YQ		TUMOR FREE			NO
TCGA-55-8206-01A					56		213.60.0	Nationwide Children's Hospital	TCGA-55-8206-F65698	E1AC477E-3512-4DF7-979A-AB575A80690D	TCGA-55-8206	22	26			0		Lung Adenocarcinoma	98						04C6153F-B3CA-4F5A-A2A5-4D986A2BC22D	Scheduled Follow-up Submission	Complete Remission/Response	No	YES						NO	12	9	NO		No	M0	N0	T1b	8206		TUMOR FREE			NO
TCGA-05-5423-01A					65		84.73.0	Nationwide Children's Hospital			TCGA-05-5423	22				0		Lung Adenocarcinoma							C110E700-9B25-4E12-B5D1-123A5EDA92D9			No	YES							12			72	No	M0	N1	T2	5423
TCGA-MN-A4N1-01A					60		264.60.0	Nationwide Children's Hospital	TCGA-MN-A4N1-F56662	0BAC11C6-A02B-49D5-A830-26313F1AC0F6	TCGA-MN-A4N1	22	17			0		Lung Adenocarcinoma	55		YES		IHC	YES	F0B4D629-1DBE-4013-9E2F-FEDF62AE810D	Scheduled Follow-up Submission	Complete Remission/Response	No	YES		NO				NO	12	2	NO		Yes, History of Prior Malignancy	M0	N1	T2a	A4N1		TUMOR FREE			NO
TCGA-64-5779-01A					61		84.73.0	Nationwide Children's Hospital	TCGA-64-5779-F11373	04f76938-5fba-43c0-98dc-09975c964e2b	TCGA-64-5779	22	2			0		Lung Adenocarcinoma	100	0					5D11838E-0F84-4140-A7BC-CF598530455D		Stable Disease	No	YES					Central Lung		12	5	NO	40	No	M0	N2	T2	5779	Post-Adjuvant Therapy				YES
TCGA-69-8254-01A					85		222.60.0	Nationwide Children's Hospital	TCGA-69-8254-F41950	F1B78CC3-B120-4814-91CD-93C4CD359BEA	TCGA-69-8254	22	5			0		Lung Adenocarcinoma		0	YES	Other		NO	7BA05C87-6817-46AA-A874-06E80B475E63	Scheduled Follow-up Submission	Complete Remission/Response	No	YES		NO				NO	12	4	NO	40	No			T2b	8254	Preoperative	TUMOR FREE			NO
TCGA-91-6848-01A					59		160.69.0	Nationwide Children's Hospital	TCGA-91-6848-F32641	DA1E6F28-C0EE-4F97-B849-62A0E36951AB	TCGA-91-6848	22	5			0		Lung Adenocarcinoma							376AA1CF-2625-4C61-A034-6238C10060DD	Scheduled Follow-up Submission	Complete Remission/Response	No	YES		YES	NO			YES	12	6	NO		No	MX	N2	T2	6848		TUMOR FREE			YES
TCGA-55-7995-01A	YES	YES	NO		73		204.62.0	Nationwide Children's Hospital	TCGA-55-7995-F65700	FD821C68-D4E0-4555-BAD0-65DC0C3F3FD0	TCGA-55-7995	22	26			0	468	Lung Adenocarcinoma	51	1	NO			NO	D11C0215-88F8-46BC-A974-67E43EE66390	Scheduled Follow-up Submission	Complete Remission/Response	No	YES	80				Peripheral Lung	NO	12	9	YES	60	No	M0	N0	T1b	7995	Post-Adjuvant Therapy	TUMOR FREE			NO
TCGA-05-5420-01A					67		84.73.0	Nationwide Children's Hospital	TCGA-05-5420-F36422	5E6ACDEB-BC35-4B1C-BF79-F54891E7274D	TCGA-05-5420	22	30			0	245	Lung Adenocarcinoma							C67C9A1E-4AA8-4BA9-B474-5AAF69227A95	Scheduled Follow-up Submission	Progressive Disease	No	YES						NO	12	10	YES	40	Yes	M0	N2	T2	5420		WITH TUMOR
TCGA-44-7669-01A	NO	NO	NO	YES	59		183.66.0	Nationwide Children's Hospital	TCGA-44-7669-F20203	acda688e-dc06-46a1-b242-5151d5db16d9	TCGA-44-7669	22	6		390	0	390	Lung Adenocarcinoma	52	4					A9369F63-53EE-4B7C-8898-DFD8BB82FE07	Scheduled Follow-up Submission	Progressive Disease	No	YES		NO					12	1	YES	20	No	MX	N1	T1b	7669	Post-Adjuvant Therapy	WITH TUMOR	84	80	YES
TCGA-44-4112-01A					60		52.74.0	Nationwide Children's Hospital	TCGA-44-4112-F13709	84d22f7a-401b-4420-92c0-d5bd3374c131	TCGA-44-4112	22	11			0		Lung Adenocarcinoma		0					8160A538-646D-42AB-879E-E6316469E3F7	Scheduled Follow-up Submission	Complete Remission/Response	No	YES		NO					12	7		30	No	M0	N0	T2a	4112	Adjuvant therapy	TUMOR FREE			YES
TCGA-44-4112-01B					60		52.74.0	Nationwide Children's Hospital	TCGA-44-4112-F13709	84d22f7a-401b-4420-92c0-d5bd3374c131	TCGA-44-4112	22	11			0		Lung Adenocarcinoma		0					8160A538-646D-42AB-879E-E6316469E3F7	Scheduled Follow-up Submission	Complete Remission/Response	No	YES		NO					12	7		30	No	M0	N0	T2a	4112	Adjuvant therapy	TUMOR FREE			YES
TCGA-97-8176-01A					63		238.60.0	Nationwide Children's Hospital	TCGA-97-8176-F49542	F462990E-8C16-40DE-BCD8-D98F16F60DA6	TCGA-97-8176	22	11			0		Lung Adenocarcinoma	61		YES			NO	37BD0275-F5DA-4A8C-893B-444D5169A425	Scheduled Follow-up Submission	Progressive Disease	No	YES		YES	YES	G12S		NO	12	10	NO	40	No	M0	N1	T3	8176			68	104	YES
TCGA-05-5428-01A					57		84.73.0	Nationwide Children's Hospital	TCGA-05-5428-F36401	A9413EB4-15FC-4952-A58C-DEF0CFDC8CB1	TCGA-05-5428	22	30			0		Lung Adenocarcinoma							A19E6940-6373-46E6-BF9C-86E7C4A76477	Scheduled Follow-up Submission	Complete Remission/Response	No	YES						NO	12	10	NO	30	No	M0	N1	T1b	5428		TUMOR FREE			YES
TCGA-86-8074-01A					62		213.60.0	Nationwide Children's Hospital	TCGA-86-8074-F41667	69D69C1B-6691-4BAA-A3F5-3E34CBD24E19	TCGA-86-8074	22	26			0		Lung Adenocarcinoma			NO			NO	A4367B0F-42ED-4F1A-960E-FA694E947704	Scheduled Follow-up Submission		No	YES		NO			Peripheral Lung	YES	12	3		40	No	M0	N1	T1b	8074
TCGA-NJ-A7XG-01A					49		406.37.0	Nationwide Children's Hospital	TCGA-NJ-A7XG-F71390	79C34A2C-8467-47E1-BC78-F4652344C551	TCGA-NJ-A7XG	22	25			0		Lung Adenocarcinoma			YES	Other			209EEFE2-3E64-489E-AC2C-C18A64CF81ED	Scheduled Follow-up Submission	Stable Disease	No	YES		YES	NO			NO	12	3	NO		No	M0	N1	T4	A7XG		WITH TUMOR			YES
TCGA-55-7574-01A	YES	YES	NO	NO	64		166.67.0	Nationwide Children's Hospital	TCGA-55-7574-F64279	5044B8DF-923E-4D53-9106-5A864756F25C	TCGA-55-7574	22	28			0	478	Lung Adenocarcinoma		3					FD824B7F-61B6-4E96-B100-318F83830C4E	Scheduled Follow-up Submission	Progressive Disease	No	YES	50	NO				NO	12	8	YES	2	No	M0	N0	T2a	7574	Post-Adjuvant Therapy	WITH TUMOR			YES
TCGA-91-A4BC-01A					59		258.59.0	Nationwide Children's Hospital	TCGA-91-A4BC-F45192	5A4ACA69-D8C5-4169-9815-150180962775	TCGA-91-A4BC	22	10			0		Lung Adenocarcinoma	44		NO				2415357E-0EF8-4A02-9BC6-B0F7B685BD2A	Scheduled Follow-up Submission		No	YES		NO				YES	12	7		30	Yes, History of Synchronous/Bilateral Malignancy	MX	N0	T2b	A4BC				69
TCGA-86-7953-01A					69		204.62.0	Nationwide Children's Hospital	TCGA-86-7953-F41095	F62E2EA8-719A-48F5-8571-DB4C59F3A166	TCGA-86-7953	22	12			0		Lung Adenocarcinoma		1	NO				7797DAD3-1DB7-456B-91DD-926F45A316DB	Scheduled Follow-up Submission	Complete Remission/Response	No	YES	90				Peripheral Lung	NO	12	3	NO		No	M0	N0	T1b	7953	Preoperative	TUMOR FREE			NO
TCGA-53-7624-01A	YES	YES		YES	40		183.66.0	Nationwide Children's Hospital	TCGA-53-7624-F39722	9661057B-3EF1-4814-AE67-408068F09148	TCGA-53-7624	22	31		593	0	400	Lung Adenocarcinoma			NO			NO	02DA679B-3BD6-46B9-9665-709C9B92464B	Scheduled Follow-up Submission	Progressive Disease	No	YES	0	NO			Peripheral Lung	NO	12	1	YES	50	No	M1	N0	T2	7624		WITH TUMOR			YES
TCGA-55-8614-01A					76		238.60.0	Nationwide Children's Hospital	TCGA-55-8614-F47843	FC34AC51-73E6-4D1F-9BBE-658B99CDD4D5	TCGA-55-8614	22	29			0		Lung Adenocarcinoma	113						E8D1F5B6-5CB5-485E-8821-869A216DC468	Scheduled Follow-up Submission	Complete Remission/Response	No	YES						NO	12	8	NO	40	No	MX	N0	T2a	8614		TUMOR FREE			NO
TCGA-44-8120-01A					58		213.60.0	Nationwide Children's Hospital	TCGA-44-8120-F36757	9CE462FD-8E7F-483D-BB93-B5B2CDFCA189	TCGA-44-8120	22	13			0		Lung Adenocarcinoma		0					BF4AC9D5-9E3F-4831-955E-549A5BC87898	Scheduled Follow-up Submission	Complete Remission/Response	No	YES						NO	12	11	NO	30	No	M0	N0	T2a	8120	Preoperative	TUMOR FREE	100	101	NO
TCGA-NJ-A55A-01A					76		278.56.0	Nationwide Children's Hospital	TCGA-NJ-A55A-F50896	C6E65920-A007-4160-A4CD-196B5F996C14	TCGA-NJ-A55A	22	1			0		Lung Adenocarcinoma			NO			NO	02B6AA97-98B2-4BDA-B9A7-94A0AE6B49E7	Scheduled Follow-up Submission	Stable Disease	No	YES		NO				NO	12	11	NO	25	No	M0	N0	T2	A55A		TUMOR FREE			NO
TCGA-50-6597-01A					79		144.70.0	Nationwide Children's Hospital	TCGA-50-6597-F44134	FC850BDD-7D70-423E-97AE-7FE982CCC259	TCGA-50-6597	22	13			0		Lung Adenocarcinoma			YES				CFCBE560-2DC9-46E8-A8D8-7390076C6BF3	Scheduled Follow-up Submission	Complete Remission/Response	No	YES		YES	NO			NO	12	6	NO		No	M0	N0	T2	6597		TUMOR FREE			NO
TCGA-49-AAR0-01A					57		406.37.0	Nationwide Children's Hospital	TCGA-49-AAR0-F70568	F9F535E5-5CBE-4B1A-AA4E-859DCDC99180	TCGA-49-AAR0	22	25			0		Lung Adenocarcinoma	107	1					BA5875FA-FF9C-48BF-8A7F-B708D3F2E275	Scheduled Follow-up Submission	Complete Remission/Response	No	YES	80					NO	12	2	NO	37	Yes, History of Prior Malignancy	MX	N0	T1	AAR0	Preoperative	TUMOR FREE	80	62.5	NO
TCGA-49-4490-01A					45		144.70.0	Nationwide Children's Hospital	TCGA-49-4490-F14703	b7af674f-dfd7-41ca-b313-fbe7cf636256	TCGA-49-4490	22	9			0		Lung Adenocarcinoma							AD4A3A4C-AA14-45A5-A202-183C9A94D6CE	Scheduled Follow-up Submission		No	YES							12	8	NO	5	No	M0	N2	T3	4490		WITH TUMOR			YES
TCGA-62-A470-01A					84		258.59.0	Nationwide Children's Hospital			TCGA-62-A470	22				0		Lung Adenocarcinoma			NO			NO	F2B22DC2-81FF-40DD-89EC-A46966FB49AB			No	YES		NO			Central Lung		12			30	No	M0	N0	T2	A470
TCGA-55-A48Z-01A	NO	YES	NO	NO	60		264.60.0	Nationwide Children's Hospital	TCGA-55-A48Z-F59061	D7D0B518-0721-4E90-96F0-BBDE43C09282	TCGA-55-A48Z	22	30			0	536	Lung Adenocarcinoma	110		YES	Other	FISH	YES	D903A33D-EF31-4D41-8370-64C5A1140066	Scheduled Follow-up Submission		No	YES		YES	NO		Central Lung	NO	12	4	YES	40	No	MX	N3	T1a	A48Z		WITH TUMOR			YES
TCGA-MP-A4TD-01A					71		278.56.0	Nationwide Children's Hospital			TCGA-MP-A4TD	22				0		Lung Adenocarcinoma	61		NO			NO	2294744E-32AF-4DFE-B901-2FF3A2685583			No	YES		NO			Peripheral Lung		12			20	Yes, History of Prior Malignancy	M0	N2	T2	A4TD				92
TCGA-78-8648-01A					58		238.60.0	Nationwide Children's Hospital			TCGA-78-8648	22				0		Lung Adenocarcinoma	69		NO			NO	3876F412-F48B-4B69-B934-EC91C7950CA6			No	YES		NO			Peripheral Lung		12			45	No	M0	N0	T3	8648
TCGA-55-7283-01A					76		166.67.0	Nationwide Children's Hospital	TCGA-55-7283-F46988	CD19EF4F-EC9B-43BD-8940-11F6F54CB88D	TCGA-55-7283	22	21			0		Lung Adenocarcinoma	64		NO			NO	D36D585E-D886-4EC5-8A43-EECA820CC3ED	Scheduled Follow-up Submission	Partial Remission/Response	No	YES		NO			Central Lung	NO	12	8	NO	5	No	MX	N2	T3	7283		WITH TUMOR			YES
TCGA-55-7815-01A	YES	NO	NO		76		196.64.0	Nationwide Children's Hospital	TCGA-55-7815-F61495	65349788-E32F-44C4-B26D-8C918338BD6E	TCGA-55-7815	22	30			0	466	Lung Adenocarcinoma	59						5B2E8719-7A63-41EC-B42A-33DA7248EE16	Scheduled Follow-up Submission	Progressive Disease	No	YES						NO	12	6	YES		No	MX	N0	T2a	7815		WITH TUMOR		76	NO
TCGA-97-8175-01A	YES	YES	YES		55		222.60.0	Nationwide Children's Hospital	TCGA-97-8175-F44234	891298DD-4123-4570-8D90-B7AF4B6AF406	TCGA-97-8175	22	19	294		0	294	Lung Adenocarcinoma			YES		FISH	YES	25D84345-903D-4EA8-ABAD-4ED998BCC9BE	Scheduled Follow-up Submission	Complete Remission/Response	No	YES		YES	NO		Peripheral Lung	NO	12	6	YES		No	M0	N0	T2a	8175		TUMOR FREE			NO
TCGA-97-A4M0-01A					60		264.60.0	Nationwide Children's Hospital	TCGA-97-A4M0-F57385	551C91CF-3AEC-44DA-BF0F-DAB40F977E32	TCGA-97-A4M0	22	10			0		Lung Adenocarcinoma		0	NO			NO	49F14554-EEAB-4D8F-B01D-399EBD5A7E00	Scheduled Follow-up Submission	Complete Remission/Response	No	YES		YES	YES	G12C		NO	12	3	NO	34	No	M0	N0	T2a	A4M0	Other	TUMOR FREE			NO
TCGA-44-5645-01A					61		84.73.0	Nationwide Children's Hospital	TCGA-44-5645-F14601	9d996467-3fd5-408f-9225-258a86d0bd01	TCGA-44-5645	22	4			0		Lung Adenocarcinoma	82						37B44453-A0B4-4C66-9788-87B220791381	Scheduled Follow-up Submission	Complete Remission/Response	No	YES							12	8	NO	5	No		NX	T1	5645		TUMOR FREE			NO
TCGA-44-5645-01B					61		84.73.0	Nationwide Children's Hospital	TCGA-44-5645-F14601	9d996467-3fd5-408f-9225-258a86d0bd01	TCGA-44-5645	22	4			0		Lung Adenocarcinoma	82						37B44453-A0B4-4C66-9788-87B220791381	Scheduled Follow-up Submission	Complete Remission/Response	No	YES							12	8	NO	5	No		NX	T1	5645		TUMOR FREE			NO
TCGA-44-5643-01A					53		84.73.0	Nationwide Children's Hospital	TCGA-44-5643-F12927	0dd73d87-f8f5-42fe-85e8-a7552e3c8915	TCGA-44-5643	22	14			0		Lung Adenocarcinoma	75						CA733262-5676-4FB9-B354-DFCF822CB899			No	YES							12	6		20	No	M0	N2	T2b	5643		WITH TUMOR			YES
TCGA-78-7146-01A					71		166.67.0	Nationwide Children's Hospital	TCGA-78-7146-F16969	89a4cee2-d516-4b0e-8664-c1a31a242e71	TCGA-78-7146	22	28			0		Lung Adenocarcinoma			NO			NO	D8F1C928-443A-404C-88C2-BE0DCB4D480C	Scheduled Follow-up Submission		No	YES		NO			Peripheral Lung		12	9		6	No	M0	N2	T2	7146					NO
TCGA-50-5066-01A	YES	NO	NO	YES	72		84.73.0	Nationwide Children's Hospital	TCGA-50-5066-F32028	e8fd3201-f957-4c6e-9942-c2fc7699fcd8	TCGA-50-5066	22	15		598	0	477	Lung Adenocarcinoma			YES			YES	440B40A6-87D5-43FC-A7F6-E55211A1D92D	Scheduled Follow-up Submission	Progressive Disease	No	YES		YES	NO			NO	12	5	YES		No	M0	N0	T2	5066		WITH TUMOR			YES
TCGA-69-7763-01A					69		196.64.0	Nationwide Children's Hospital	TCGA-69-7763-F20990	742bb503-45e8-406d-8578-66299cd22dfb	TCGA-69-7763	22	26			0		Lung Adenocarcinoma	72		NO			NO	1A92E0D9-E549-4CF0-8096-BF2AA713D1C9	Scheduled Follow-up Submission		No	YES		NO			Peripheral Lung		12	1	NO	7.5	No	M0	N0	T1b	7763					NO
TCGA-50-5935-01A			NO		86		119.76.0	Nationwide Children's Hospital	TCGA-50-5935-F32108	1e2da076-3f69-4de4-af22-9f3dfc1ce1f3	TCGA-50-5935	22	17			0		Lung Adenocarcinoma			YES	Other			F7B464CF-ABEA-4DBB-A5AD-380589EDC2DB	Scheduled Follow-up Submission	Complete Remission/Response	No	YES		YES	YES			NO	12	5	NO		Yes	M0	N0	T1	5935		TUMOR FREE			NO
TCGA-69-7973-01A	NO	NO	NO	NO	42		204.62.0	Nationwide Children's Hospital	TCGA-69-7973-F30347	3A3CBBC0-50FA-42BB-88C1-99E0CF4F765C	TCGA-69-7973	22	9			0		Lung Adenocarcinoma		1	YES				CD8B5503-F771-436D-B665-E5A006211357	Scheduled Follow-up Submission	Complete Remission/Response	No	YES					Central Lung		12	4	NO	25	No	M0	N0	T2a	7973	Post-Adjuvant Therapy	TUMOR FREE			YES
TCGA-67-4679-01B					69		119.76.0	Nationwide Children's Hospital			TCGA-67-4679	22				0		Lung Adenocarcinoma			NO			NO	9F12FDD3-967A-485F-A991-A922242E92A5			No	YES		NO			Central Lung		12				No	M0	N0	T3	4679
TCGA-86-8672-01A					59		238.60.0	Nationwide Children's Hospital	TCGA-86-8672-F46401	892123F6-665F-4DAC-96FE-4E45BD22A9D6	TCGA-86-8672	22	7			0		Lung Adenocarcinoma							3A9D53C6-BE94-40EC-AA5E-28A2B7672306	Scheduled Follow-up Submission		No	YES		NO			Central Lung	NO	12	8	NO		No	M0	N0	T3	8672					NO
TCGA-78-7161-01A	NO	NO	NO	NO	69		166.67.0	Nationwide Children's Hospital	TCGA-78-7161-F18779	943f77cc-64c8-471a-9f85-66e8393a2463	TCGA-78-7161	22	25			0	162	Lung Adenocarcinoma			YES			NO	2111EFA5-06DA-470D-AA79-16D8E571227D	Scheduled Follow-up Submission		No	YES		NO			Peripheral Lung		12	11	YES	27.8	No	M0	N0	T3	7161		WITH TUMOR			YES
TCGA-78-7150-01A	YES	YES	NO	YES	59		166.67.0	Nationwide Children's Hospital	TCGA-78-7150-F16962	09ad8f79-3e06-43f3-9c00-cd8c7e87bdcc	TCGA-78-7150	22	28		164	0	139	Lung Adenocarcinoma			NO			NO	E55DF661-4D40-463F-B5FB-81FDC7CA5F46	Scheduled Follow-up Submission		No	YES		NO			Central Lung		12	9	YES	37	No	M0	N1	T2	7150		WITH TUMOR			NO
TCGA-69-7980-01A			NO		70		204.62.0	Nationwide Children's Hospital	TCGA-69-7980-F39916	B9570D2D-FF75-4067-8D99-C36BCD332AC0	TCGA-69-7980	22	11			0		Lung Adenocarcinoma	71		YES	Other		NO	2C640BD2-5E8B-4A96-995B-E105C125FD2F	Scheduled Follow-up Submission		No	YES		NO				NO	12	2	NO	80	No	M0	N0	T1b	7980		TUMOR FREE			NO
TCGA-44-7660-01A	NO	NO	NO		72		183.66.0	Nationwide Children's Hospital	TCGA-44-7660-F32361	57f9b0eb-17e0-4b6b-92a0-407511f014d9	TCGA-44-7660	22	24			0	253	Lung Adenocarcinoma	80						B9A3879B-EE5B-4379-883D-6F2871825773	Scheduled Follow-up Submission	Progressive Disease	No	YES		NO				NO	12	5	YES	124	No	MX	N0	T2	7660		WITH TUMOR	95	94	YES
TCGA-55-8090-01A	NO	NO		NO	80		213.60.0	Nationwide Children's Hospital	TCGA-55-8090-F56189	05C48DBC-1101-4B07-947B-180BC0D657EE	TCGA-55-8090	22	29			0	548	Lung Adenocarcinoma	58						CD04743F-3D70-4A99-985E-66A8C5A997C0	Scheduled Follow-up Submission	Progressive Disease	No	YES						NO	12	1	YES		Yes, History of Synchronous/Bilateral Malignancy	M0	N0	T1a	8090		WITH TUMOR	4	6	NO
TCGA-73-7498-01A					58		204.62.0	Nationwide Children's Hospital	TCGA-73-7498-F48755	E191A2F8-AD1C-44A4-97DF-59279AC7A789	TCGA-73-7498	22	20			0		Lung Adenocarcinoma	74	0	NO			NO	4A9BA5C7-A43A-433D-A3BB-7446130851C8	Scheduled Follow-up Submission	Complete Remission/Response	No	YES	100	NO			Peripheral Lung	NO	12	9	NO	28	Yes, History of Synchronous/Bilateral Malignancy	M0	N0	T1b	7498	Pre-Adjuvant Therapy	TUMOR FREE	89.6	60.1	YES
TCGA-97-7553-01A					58		166.67.0	Nationwide Children's Hospital	TCGA-97-7553-F31865	BA07C466-8C62-4560-BB7C-07344BAF0FA8	TCGA-97-7553	22	14			0		Lung Adenocarcinoma	64						0A7CF8FA-521F-4895-A088-138524518B58	Scheduled Follow-up Submission		No	YES					Central Lung	NO	12	5	NO	20	No	MX	N0	T1	7553		TUMOR FREE	70	99	NO
TCGA-86-7955-01A					62		204.62.0	Nationwide Children's Hospital	TCGA-86-7955-F41096	BE3BF32A-D5A9-43DA-BE40-6F8B888E0949	TCGA-86-7955	22	12			0		Lung Adenocarcinoma		1	NO				345D0D69-2DE0-4315-AC09-026827E0E36E	Scheduled Follow-up Submission	Complete Remission/Response	No	YES	90	NO			Peripheral Lung	NO	12	3	NO		No	M0	N0	T2a	7955	Preoperative	TUMOR FREE			YES
TCGA-05-4425-01A					70		119.76.0	Nationwide Children's Hospital			TCGA-05-4425	22				0		Lung Adenocarcinoma							FC4BE478-94D8-4529-B03D-FF23E0C17A79			No	YES							12			28	No	M1	N0	T2	4425
TCGA-50-5939-01A					85		84.73.0	Nationwide Children's Hospital	TCGA-50-5939-F32124	2105f694-4ccf-4c6e-8eba-917a55c789e3	TCGA-50-5939	22	17			0		Lung Adenocarcinoma							D9175EB1-505B-4EBB-BE91-5E38D5A090CE	Scheduled Follow-up Submission	Complete Remission/Response	No	YES							12	5	NO	15	No	M0	N0	T2	5939		TUMOR FREE			NO
TCGA-55-A493-01A					54		258.59.0	Nationwide Children's Hospital			TCGA-55-A493	22				0		Lung Adenocarcinoma	102		NO			NO	A730F531-AAEA-4449-AD92-6D41A87961D7			No	YES		NO					12			53	No	M0	N0	T2a	A493			71	2
TCGA-55-8208-01A		YES		YES	73		213.60.0	Nationwide Children's Hospital	TCGA-55-8208-F59045	6F292E9C-8A64-4D70-B169-8AE2D8E32EB1	TCGA-55-8208	22	30		536	0	511	Lung Adenocarcinoma	50						322EA80F-1046-4FEA-8874-E079D9161241	Scheduled Follow-up Submission	Stable Disease	No	YES					Peripheral Lung	YES	12	4	YES	50	No	M0	N0	T1b	8208		WITH TUMOR	68	151	NO
TCGA-95-7567-01A					61		183.66.0	Nationwide Children's Hospital	TCGA-95-7567-F21122	cce538be-9b1a-4b55-a8d1-868d7561b6ab	TCGA-95-7567	22	31			0		Lung Adenocarcinoma		1					8D792E07-7BB9-4883-9A42-1C6B14063FFD	Scheduled Follow-up Submission		No	YES							12	1	NO		No	M0	N1	T2b	7567	Post-Adjuvant Therapy	TUMOR FREE			YES
TCGA-78-7160-01A					61		166.67.0	Nationwide Children's Hospital	TCGA-78-7160-F16984	c5a03168-cea3-45ad-bf3f-9a0c42ce2888	TCGA-78-7160	22	29			0		Lung Adenocarcinoma			NO			NO	669B562A-ED8B-4402-AABC-61EBE9D3184C	Scheduled Follow-up Submission		No	YES		NO			Central Lung		12	9		43.8	No	M1	N2	T4	7160					YES
TCGA-73-4666-01A	NO	YES	NO	YES	52		58.77.0	Nationwide Children's Hospital	TCGA-73-4666-F12865	66debbbc-3fbd-4209-a23b-eb3076bc6ed8	TCGA-73-4666	22	10		-43	0		Lung Adenocarcinoma		1	NO			NO	7CC68F70-07F1-4FDB-B6AF-25C8FF5075EC		Complete Remission/Response	No	YES	80	NO			Central Lung		12	6	YES	10	No	M1	N0	T1	4666	Post-Adjuvant Therapy	TUMOR FREE			YES
TCGA-44-7672-01A					52		183.66.0	Nationwide Children's Hospital	TCGA-44-7672-F20374	80e34e50-79ea-44cf-9fc7-6a93b7e88cf0	TCGA-44-7672	22	10			0		Lung Adenocarcinoma	82						00006941-870C-4AF2-B494-FE2D7DFE091A	Scheduled Follow-up Submission	Complete Remission/Response	No	YES							12	1	NO	20	No	M0	N0	T1b	7672		TUMOR FREE			NO
TCGA-64-1679-01A					58		183.66.0	Nationwide Children's Hospital	TCGA-64-1679-F20369	8a815a0c-b766-4a8e-9b29-7eeb682a688e	TCGA-64-1679	22	21			0		Lung Adenocarcinoma		0					FDDF3AEC-0391-455C-A935-879485FA05B7	Scheduled Follow-up Submission		No	YES		NO					12	12	NO	40	No	M0	N2	T1	1679	Post-Adjuvant Therapy	TUMOR FREE			YES
TCGA-49-6761-01A	NO	NO			68		160.69.0	Nationwide Children's Hospital	TCGA-49-6761-F22056	8ad6b3d6-48a1-4f9e-8ea6-cf0d7394cdf6	TCGA-49-6761	22	23			0		Lung Adenocarcinoma	1						E0A39A36-9287-4180-8C7E-5DD423122A19	Scheduled Follow-up Submission		No	YES							12	2	NO	50	Yes	MX	N2	T1	6761			64	56	NO
TCGA-93-A4JO-01A					70		264.60.0	Nationwide Children's Hospital			TCGA-93-A4JO	22				0		Lung Adenocarcinoma	81		NO			NO	0A193D64-36A8-4A43-BAFC-7C4E133C7E6B			No	YES		NO					12			50	No	MX	N0	T1a	A4JO			126	97
TCGA-99-8025-01A					72		213.60.0	Nationwide Children's Hospital	TCGA-99-8025-F57698	13030256-EACD-4E4B-B19C-592CBBE0A543	TCGA-99-8025	22	23			0		Lung Adenocarcinoma	87		YES			YES	B86F9CF2-7D0F-4236-985E-4162762F14EC	Scheduled Follow-up Submission	Complete Remission/Response	No	YES		YES	NO		Central Lung	NO	12	5	NO	20	No	M0	N2	T3	8025		TUMOR FREE			YES
TCGA-86-8279-01A					46		222.60.0	Nationwide Children's Hospital	TCGA-86-8279-F41673	56E63750-3C49-4C3E-8586-0497C56C4A45	TCGA-86-8279	22	25			0		Lung Adenocarcinoma		1					649D8AEE-D786-4907-958B-1F331469EB3F	Scheduled Follow-up Submission	Complete Remission/Response	No	YES	90	NO			Peripheral Lung	NO	12	3	NO		No	M0	N1	T2a	8279	Pre-Adjuvant Therapy	TUMOR FREE			YES
TCGA-95-7039-01A					54		160.69.0	Nationwide Children's Hospital	TCGA-95-7039-F15635	1a1c33a9-1df7-4697-9cac-7d942e1bf067	TCGA-95-7039	22				0		Lung Adenocarcinoma		1					CECD2FED-D69E-493D-9608-1D064085B96F	Scheduled Follow-up Submission	Complete Remission/Response	No	YES							12	8		34	No	MX	N0	T3	7039	Preoperative				NO
TCGA-53-A4EZ-01A					63		264.60.0	Nationwide Children's Hospital	TCGA-53-A4EZ-F61081	F04EA78A-0FDE-41CC-8D26-94D7E06CF8A2	TCGA-53-A4EZ	22	19			0		Lung Adenocarcinoma	86	1	YES		FISH	YES	37B59429-B21F-4943-AD16-377F12D0C829	Scheduled Follow-up Submission	Complete Remission/Response	No	YES	80	YES	NO		Peripheral Lung	NO	12	3	NO	40	No	MX	N1	T2a	A4EZ	Post-Adjuvant Therapy	TUMOR FREE	73	75	YES
TCGA-50-5942-01A					67		119.76.0	Nationwide Children's Hospital	TCGA-50-5942-F32133	266b3dcd-9cf6-4c25-adb5-da7f91e8ce40	TCGA-50-5942	22	17			0		Lung Adenocarcinoma							355FBCCA-484E-4A26-ADE6-DCEC303BF4FE	Scheduled Follow-up Submission	Stable Disease	No	YES						NO	12	5	NO	30	No	M0	N0	T1	5942		TUMOR FREE			NO
TCGA-J2-8192-01A	YES	NO	NO	NO	65		213.60.0	Nationwide Children's Hospital	TCGA-J2-8192-F55390	EFDC3166-C726-484E-8EB1-5A436DF66A0A	TCGA-J2-8192	22	18			0	482	Lung Adenocarcinoma	112		YES	Exon 19 Deletion		NO	212A86EB-9C75-4526-B1B3-32283EEC0623	Scheduled Follow-up Submission		No	YES		YES	NO			NO	12	2	YES		Yes, History of Prior Malignancy	MX	N1	T2a	8192			100	89	YES
TCGA-05-4417-01A					51		144.70.0	Nationwide Children's Hospital	TCGA-05-4417-F36502	9B56A013-ECA5-4BE4-BC40-1E4BCAAE0501	TCGA-05-4417	22	31			0		Lung Adenocarcinoma							39B7F192-3BEA-4DB6-8739-C073034E7B27	Scheduled Follow-up Submission	Partial Remission/Response	No	YES						NO	12	10	NO	56	No	M0	N0	T2	4417		TUMOR FREE			NO
TCGA-62-8395-01A	YES	NO	NO		80		232.55.0	Nationwide Children's Hospital	TCGA-62-8395-F42099	2705FAEA-A87F-4437-8A72-3CD9216FC451	TCGA-62-8395	22	15			0	395	Lung Adenocarcinoma		0	YES			NO	D4EF6337-A021-4C69-8786-81F21AFB9632	Scheduled Follow-up Submission	Progressive Disease	No	YES	100	NO			Central Lung	NO	12	5	YES		No	M0	N0	T3	8395	Preoperative	WITH TUMOR			NO
TCGA-55-7726-01A					72		196.64.0	Nationwide Children's Hospital	TCGA-55-7726-F47844	3F1E5E80-6F83-41FA-8999-94F152C1EDCB	TCGA-55-7726	22	29			0		Lung Adenocarcinoma	72						AECEA302-907D-42D1-A801-30E631B219AF	Scheduled Follow-up Submission	Complete Remission/Response	No	YES						NO	12	8	NO	30	Yes	MX	N0	T1b	7726		TUMOR FREE	59	61	NO
TCGA-55-7284-01B	NO	NO	NO	NO	74		213.60.0	Nationwide Children's Hospital	TCGA-55-7284-F61486	411282A6-43D3-468C-8DD9-47C991653F13	TCGA-55-7284	22	30			0	231	Lung Adenocarcinoma	89						48632EC4-F756-4626-98AF-7519C3F7E64E	Scheduled Follow-up Submission	Progressive Disease	No	YES						NO	12	6	YES		Yes, History of Synchronous/Bilateral Malignancy	MX	N0	T3	7284		WITH TUMOR	102	70	NO
TCGA-55-8096-01A	NO	YES		NO	67		213.60.0	Nationwide Children's Hospital	TCGA-55-8096-F59097	8C87E2A2-73CA-4684-8F57-4E60B151A5F2	TCGA-55-8096	22	30			0	566	Lung Adenocarcinoma			NO			NO	A8F76D35-E00D-49EC-BC34-4E3D7730D01F	Scheduled Follow-up Submission	Progressive Disease	No	YES		NO			Central Lung	NO	12	4	YES	104	No	MX	N0	T2a	8096		WITH TUMOR			NO
TCGA-55-8621-01A					75		238.60.0	Nationwide Children's Hospital	TCGA-55-8621-F48791	E4B4EB9A-0821-4025-BE16-EFAD0D846418	TCGA-55-8621	22	20			0		Lung Adenocarcinoma		1					E4B2452E-045E-482C-93C5-5A96006DC180	Scheduled Follow-up Submission	Complete Remission/Response	No	YES	90					NO	12	9	NO	30	Yes, History of Prior Malignancy	MX	N0	T1a	8621	Other	TUMOR FREE	112	105	NO
TCGA-L9-A7SV-01A					69		406.37.0	Nationwide Children's Hospital	TCGA-L9-A7SV-F65116	4AC0A1A6-41A9-4E59-B676-A750306905C7	TCGA-L9-A7SV	22	18			0		Lung Adenocarcinoma	55	0	NO			NO	15A08B6D-46EF-43B0-97DA-2D0F321C6C88	Scheduled Follow-up Submission	Complete Remission/Response	No	YES		NO				NO	12	9	NO	93	No	M0	N1	T2a	A7SV	Preoperative	TUMOR FREE	40	45	YES
TCGA-55-8094-01A					51		213.60.0	Nationwide Children's Hospital	TCGA-55-8094-F66029	AE9F74E2-023B-42DA-8C1F-9C7A9F3C253B	TCGA-55-8094	22	1			0		Lung Adenocarcinoma			YES		FISH	YES	AC8B21AB-6269-49BE-9AE7-109F8A00ADBC	Scheduled Follow-up Submission	Partial Remission/Response	No	YES		NO			Peripheral Lung	NO	12	10	NO	70	No	M1b	N0	T2b	8094		WITH TUMOR			YES
TCGA-50-6673-01A					84		160.69.0	Nationwide Children's Hospital	TCGA-50-6673-F44135	48C0BF4B-CE63-4AF9-AFE7-8EC001B9BBED	TCGA-50-6673	22	13			0		Lung Adenocarcinoma							43AA3C98-6C55-4647-AA1E-39FA138F8524	Scheduled Follow-up Submission		No	YES						NO	12	6	NO		No	M0	N0	T1	6673					NO
TCGA-44-6145-01A					62		119.76.0	Nationwide Children's Hospital	TCGA-44-6145-F28687	32fc1b78-c824-434f-b655-22498b49fb64	TCGA-44-6145	22	28			0		Lung Adenocarcinoma	73						6886D83E-7610-4C53-BF86-F29B4791438D	Scheduled Follow-up Submission	Complete Remission/Response	No	YES		NO	NO				12	2	NO	75	No	M0	N0	T1	6145		TUMOR FREE	91	90	NO
TCGA-91-6835-01A					81		144.70.0	Nationwide Children's Hospital	TCGA-91-6835-F32643	169e8cda-2406-4085-97e2-7287e1bd2e41	TCGA-91-6835	22	5			0		Lung Adenocarcinoma	78		NO				D9F21111-AE9A-4546-935A-85C411F646B2	Scheduled Follow-up Submission	Complete Remission/Response	No	YES		NO				YES	12	6	NO	25	No	M0	N0	T1	6835		TUMOR FREE		91	NO
TCGA-55-6972-01A					72		160.69.0	Nationwide Children's Hospital	TCGA-55-6972-F56187	6284B038-E7CE-476E-881E-8376A9D912BD	TCGA-55-6972	22	29			0		Lung Adenocarcinoma			NO			NO	361D2B08-FF14-4FB8-BBBF-EDEDC229FE4F	Scheduled Follow-up Submission	Complete Remission/Response	No	YES		NO				NO	12	1	NO		No	M0	N0	T2	6972		TUMOR FREE			NO
TCGA-L9-A8F4-01A					64		406.37.0	Nationwide Children's Hospital	TCGA-L9-A8F4-F64972	230AAB9B-F943-4A2F-BB3D-A975974BAD7D	TCGA-L9-A8F4	22	16			0		Lung Adenocarcinoma	35	0	NO			NO	3C587292-D41C-4B9F-BF9B-242A5C118C3F	Scheduled Follow-up Submission		No	YES		NO				NO	12	9	NO	14	No	MX	N0	T2a	A8F4	Preoperative		48	54	NO
TCGA-67-3771-01A					77		37.77.0	Nationwide Children's Hospital			TCGA-67-3771	22				0		Lung Adenocarcinoma			NO			NO	88116CFC-F872-4C55-9E27-4678008DBD81			No	YES		NO			Central Lung		12				No	M0	N0	T1	3771
TCGA-62-A46P-01A					65		258.59.0	Nationwide Children's Hospital			TCGA-62-A46P	22				0		Lung Adenocarcinoma			NO			NO	E860311C-F361-416D-AF93-5379D72F0C70			No	YES		NO			Central Lung		12			40	No	M0	N0	T2	A46P
TCGA-55-6987-01A					77		160.69.0	Nationwide Children's Hospital	TCGA-55-6987-F47803	18F46E93-2092-4031-B41F-BDDD78B2223D	TCGA-55-6987	22	28			0		Lung Adenocarcinoma			NO			NO	133B3DD6-82D6-4D14-829D-3045A7906A9F	Scheduled Follow-up Submission	Complete Remission/Response	No	YES		NO				NO	12	8	NO		No	M0	N0	T1	6987		TUMOR FREE			NO
TCGA-64-1677-01A	YES	YES	NO	NO	77		37.77.0	Nationwide Children's Hospital	TCGA-64-1677-F8691	52f57fe8-b728-4758-942d-efc01c5cbf0e	TCGA-64-1677	22	18			0	360	Lung Adenocarcinoma							50D02B11-566D-46F5-A854-FD858FE8B705			No	YES	0						12	2	YES	50	Yes	M0	N2	T2	1677					YES
TCGA-49-AAR4-01A					51		423.36.0	Nationwide Children's Hospital			TCGA-49-AAR4	22				0		Lung Adenocarcinoma	109.4						99200CFC-5B32-46F0-9683-6735B4FEA595			No	YES							12			35	No	MX	N2	T2	AAR4			79	97.5
TCGA-55-A4DG-01A					71		258.59.0	Nationwide Children's Hospital	TCGA-55-A4DG-F59047	E7DACEFC-7054-4CF2-9F0F-80A0AC65AB66	TCGA-55-A4DG	22	30			0		Lung Adenocarcinoma	61						6D1C6AA9-6911-4391-8F16-334DDAD66731	Scheduled Follow-up Submission	Complete Remission/Response	No	YES						NO	12	4	NO	100	No	MX	N0	T1b	A4DG		TUMOR FREE			NO
TCGA-44-6778-01A					59		144.70.0	Nationwide Children's Hospital	TCGA-44-6778-F15765	cdcf76b6-e93b-4d22-8d67-6a137b04617f	TCGA-44-6778	22	31			0		Lung Adenocarcinoma	53						51BED102-E3B7-488C-BF16-074F13BC9AF7	Scheduled Follow-up Submission	Complete Remission/Response	No	YES							12	8	NO	15	No	MX	N0	T1	6778		TUMOR FREE			NO
TCGA-64-5778-01A					60		84.73.0	Nationwide Children's Hospital	TCGA-64-5778-F11415	842094a7-5a39-4da3-827b-ee53549be95d	TCGA-64-5778	22	2			0		Lung Adenocarcinoma							BEC792A5-875B-437F-9FCB-A4B8C550AAA5		Complete Remission/Response	No	YES					Central Lung		12	5	NO	68	No	M0	N0	T2	5778		TUMOR FREE			NO
TCGA-78-7159-01A					60		166.67.0	Nationwide Children's Hospital	TCGA-78-7159-F16828	9d4d1342-5a7d-40a6-a7e8-c2c343ef1bcd	TCGA-78-7159	22	27			0		Lung Adenocarcinoma			NO			NO	CDCC4F06-0B6E-4BEF-92C4-2EFC0A5E5136	Scheduled Follow-up Submission		No	YES		NO			Peripheral Lung		12	9		21	No	M0	NX	T1	7159					NO
TCGA-71-8520-01A	NO	NO	NO		60		238.60.0	Nationwide Children's Hospital	TCGA-71-8520-F70925	31390530-007C-4160-9E08-4A980480B334	TCGA-71-8520	22	10			0	179	Lung Adenocarcinoma							A0A808A9-5ADF-4F2E-8DC2-EAE930CF5D8D	Scheduled Follow-up Submission	Progressive Disease	No	YES		YES	NO			NO	12	3	YES		No	M0	N0	T2	8520		WITH TUMOR			NO
TCGA-99-7458-01A					74		166.67.0	Nationwide Children's Hospital	TCGA-99-7458-F20338	6b1fe365-99fc-4a3b-8dcd-7bb0f50b1369	TCGA-99-7458	22	9			0		Lung Adenocarcinoma		1	YES		RT-PCR	YES	683B4F30-93FC-4CCB-9610-F4051B391CA1	Scheduled Follow-up Submission		No	YES	90	YES	YES	G12A			12	1	NO	52	No	M0	N0	T4	7458	Post-Adjuvant Therapy	TUMOR FREE			YES
TCGA-55-7994-01A					81		204.62.0	Nationwide Children's Hospital	TCGA-55-7994-F47823	F1F645DE-9236-459D-A930-61A18E1E6F22	TCGA-55-7994	22	28			0		Lung Adenocarcinoma			NO			NO	23DE21E2-F68F-4C2A-A585-2AFDD6E6C393	Scheduled Follow-up Submission	Complete Remission/Response	No	YES		NO				NO	12	8	NO	28	No	MX	N0	T3	7994		TUMOR FREE			YES
TCGA-86-8358-01A					44		232.55.0	Nationwide Children's Hospital	TCGA-86-8358-F58410	AE9316FF-560B-4692-AC3C-90AC5D7895B2	TCGA-86-8358	22	9			0		Lung Adenocarcinoma		0					C9B8D6BE-5761-4638-8787-998B9AFD99E7	Scheduled Follow-up Submission	Complete Remission/Response	No	YES	100	NO			Peripheral Lung	NO	12	4	NO	20	No	M0	N0	T2a	8358	Other	TUMOR FREE			NO
TCGA-49-4507-01A	YES	NO	NO	NO	73		58.77.0	Nationwide Children's Hospital	TCGA-49-4507-F7007	33c2605a-97c1-495f-ac44-17fff4c8ebd6	TCGA-49-4507	22	2			0	158	Lung Adenocarcinoma		1					FAEC78CF-EB9D-4F9B-9962-4733D2A517D8		Progressive Disease	No	YES							12	2	YES	78	No	M0	N1	T3	4507	Preoperative	WITH TUMOR			YES
TCGA-49-4486-01A	NO	NO	NO	NO	72		58.77.0	Nationwide Children's Hospital	TCGA-49-4486-F58843	67E6E0FC-CA40-4FBA-B179-4F85F0E039F6	TCGA-49-4486	22	25			0	2045	Lung Adenocarcinoma		2					C7FC568E-1D69-48B3-9562-8BEC4CD68DAF	Scheduled Follow-up Submission	Progressive Disease	No	YES	60					NO	12	4	YES	17.5	No	M0	N0	T1	4486	Other	WITH TUMOR	69	96	NO
TCGA-97-8552-01A					55		238.60.0	Nationwide Children's Hospital	TCGA-97-8552-F49557	D1BF3872-D42B-4E2D-8D18-D1AE4F0E4BDF	TCGA-97-8552	22	3			0		Lung Adenocarcinoma	75	0	YES	Exon 19 Deletion		NO	B67A5ECD-2FFF-46AF-ACB1-BEB99205AB11	Scheduled Follow-up Submission	Complete Remission/Response	No	YES		YES	NO			NO	12	10	NO		No	MX	N0	T1a	8552	Other	TUMOR FREE			NO
TCGA-NJ-A4YG-01A					65		278.56.0	Nationwide Children's Hospital	TCGA-NJ-A4YG-F50865	C3CF3C86-3DA7-477A-A2DE-B89D114EE5BC	TCGA-NJ-A4YG	22	1			0		Lung Adenocarcinoma							655D8E7C-9492-4FC3-93B5-FCE687E8C58C	Scheduled Follow-up Submission	Stable Disease	No	YES						NO	12	11	NO	104	No	M0	N0	T2	A4YG		TUMOR FREE			NO
TCGA-78-7153-01A					65		166.67.0	Nationwide Children's Hospital	TCGA-78-7153-F16980	932b04a8-46cd-464a-97f5-682b9dbe77de	TCGA-78-7153	22	29			0		Lung Adenocarcinoma			NO			NO	1017A0C7-6E41-4546-A87A-B9BD4F4A4CE0	Scheduled Follow-up Submission		No	YES		NO			Peripheral Lung		12	9		20	No	M0	N0	T2	7153					NO
TCGA-69-7761-01A					84		196.64.0	Nationwide Children's Hospital	TCGA-69-7761-F29252	86590873-3f3a-4004-8f1e-1c36818eb6fd	TCGA-69-7761	22	13			0		Lung Adenocarcinoma	80	1	YES	Other			C8FE1711-BAD0-429F-B873-1F006855A51F	Scheduled Follow-up Submission		No	YES					Peripheral Lung		12	3	NO	20	No	MX	N0	T2a	7761	Adjuvant therapy	TUMOR FREE			YES
TCGA-73-4677-01A					74		58.77.0	Nationwide Children's Hospital	TCGA-73-4677-F12744	579419ee-f9cb-451a-9a14-ad2ecfa0376b	TCGA-73-4677	22	1			0		Lung Adenocarcinoma		1	NO			NO	69146A13-3C98-4A02-9B06-4EC381DE9A9F			No	YES	80	NO			Peripheral Lung		12	6	NO		No	M0	N0	T2a	4677	Adjuvant therapy				NO
TCGA-MP-A4TI-01A					72		264.60.0	Nationwide Children's Hospital			TCGA-MP-A4TI	22				0		Lung Adenocarcinoma			YES			NO	9F24E286-E6CC-4F33-A079-05F877DA5BF9			No	YES		YES	YES	G12C			12			35	No	M0	N1	T2a	A4TI
TCGA-75-6211-01A	NO	YES		NO			119.76.0	Nationwide Children's Hospital	TCGA-75-6211-F15095	3b3000b8-4b0f-4a15-bdbc-0565868daa27	TCGA-75-6211	22	21					Lung Adenocarcinoma							BC802C73-D7B3-46B5-96FD-B20324B7DD49		Progressive Disease	No	YES							12	7	YES	34	No	M0	N0	T2	6211	Adjuvant therapy	WITH TUMOR			NO
TCGA-05-4244-01A					70		52.74.0	Nationwide Children's Hospital			TCGA-05-4244	22				0		Lung Adenocarcinoma							0178EB99-DF86-4CEC-82DA-DDA80EBDDBB1			No	YES					Peripheral Lung		12			38	No	M1	N2	T2	4244
TCGA-86-8671-01A					72		238.60.0	Nationwide Children's Hospital	TCGA-86-8671-F66089	97BC43F2-A652-4731-B5BD-37770F5ADB10	TCGA-86-8671	22	2			0		Lung Adenocarcinoma		0					84CF6F0E-C38E-498F-B1F0-60FCEB6121AF	Scheduled Follow-up Submission	Complete Remission/Response	No	YES	100				Peripheral Lung	NO	12	10	NO		No	M0	N1	T2b	8671	Other	TUMOR FREE			YES
TCGA-86-8278-01A	YES	NO	NO	NO	63		222.60.0	Nationwide Children's Hospital	TCGA-86-8278-F41668	AC1B771F-E726-4EE8-99BB-16A15628DF26	TCGA-86-8278	22	25			0	29	Lung Adenocarcinoma		1					D84C20D9-8732-43D0-A38C-F5AB0B4289AD	Scheduled Follow-up Submission	Stable Disease	No	YES	90	NO			Peripheral Lung	NO	12	3	YES		No	M0	N1	T2	8278	Preoperative	WITH TUMOR			NO
TCGA-69-7979-01A					71		204.62.0	Nationwide Children's Hospital	TCGA-69-7979-F39913	F557D080-A35A-4FC9-A673-5055389DCCF4	TCGA-69-7979	22	11			0		Lung Adenocarcinoma			NO			NO	DA790109-7990-4010-9B55-FD10F80B73F8	Scheduled Follow-up Submission	Stable Disease	No	YES		NO				NO	12	2	NO	28	No	MX	N0	T2a	7979		TUMOR FREE	71	64	NO
TCGA-55-8616-01A					58		238.60.0	Nationwide Children's Hospital			TCGA-55-8616	22				0		Lung Adenocarcinoma							4A365B83-052D-4967-B4C7-72BB233B4621			No	YES							12				No	M0	N0	T2a	8616
TCGA-55-A491-01A					81		258.59.0	Nationwide Children's Hospital	TCGA-55-A491-F60134	83201851-01DF-44E5-AB4C-DCB1F355360C	TCGA-55-A491	22	29			0		Lung Adenocarcinoma	68	2	NO			NO	1332E8F1-BAB2-43D8-926A-BAA5A39D2115	Scheduled Follow-up Submission	Complete Remission/Response	No	YES	80	NO				NO	12	5	NO	45	Yes, History of Prior Malignancy	MX	N0	T1b	A491	Other	TUMOR FREE	73	68	NO
TCGA-91-8499-01A					76		238.60.0	Nationwide Children's Hospital	TCGA-91-8499-F37976	A3296482-B65D-46DC-8306-36D9A0CE0CAB	TCGA-91-8499	22	7			0		Lung Adenocarcinoma			YES				7EC96BB9-E047-48DC-B34E-B666F6D95470	Scheduled Follow-up Submission		No	YES		NO				YES	12	12	NO	90	No	MX	N0	T1b	8499			49		NO
TCGA-38-4630-01A	NO	YES	NO	NO	75		58.77.0	Nationwide Children's Hospital	TCGA-38-4630-F4890	de9bcf35-aaab-4e5d-815f-d1568b93d2ce	TCGA-38-4630	22	14			0	524	Lung Adenocarcinoma			NO			NO	9EC268FC-05B2-478A-AE86-CDBC2A3896DC		Stable Disease	No	YES		NO			Peripheral Lung		12	12	YES		Yes	M0	N0	T2	4630		WITH TUMOR			NO
TCGA-78-7156-01A					62		166.67.0	Nationwide Children's Hospital	TCGA-78-7156-F16982	03cedf57-e893-47ff-a0d8-d67a938ec858	TCGA-78-7156	22	29			0		Lung Adenocarcinoma			NO			NO	08159DD1-9487-46B5-AFAD-FEC9F3FF2124	Scheduled Follow-up Submission		No	YES		NO			Peripheral Lung		12	9		84	No	M1	N1	T4	7156					NO
TCGA-55-7914-01A					71		196.64.0	Nationwide Children's Hospital	TCGA-55-7914-F59091	F480A7D2-81F1-4436-93FA-C86100C335C8	TCGA-55-7914	22	30			0		Lung Adenocarcinoma	56		YES		FISH	YES	80113A53-D7BC-4BAF-823E-9D62768F63B8	Scheduled Follow-up Submission	Progressive Disease	No	YES		YES	YES	G12C	Central Lung	NO	12	4	NO	5	Yes	MX	N1	T1b	7914		WITH TUMOR			YES
TCGA-35-4123-01A					38		52.74.0	Nationwide Children's Hospital	TCGA-35-4123-F68918	EC7AA234-A6E0-4907-8754-531418756764	TCGA-35-4123	22	23			0		Lung Adenocarcinoma			NO			NO	92D5A445-5E2A-421C-B5B0-2B0CAA41B2B4	Scheduled Follow-up Submission		No	YES		NO			Peripheral Lung	YES	12	12		20	No	M0	N0	T1	4123
TCGA-05-4434-01A					67		58.77.0	Nationwide Children's Hospital			TCGA-05-4434	22				0		Lung Adenocarcinoma							2A31AE11-4831-4511-9A51-D60E1AA4297B			No	YES							12			15	Yes	M1	N1	T4	4434
TCGA-99-AA5R-01A					70		406.37.0	Nationwide Children's Hospital	TCGA-99-AA5R-F69298	BF89B2AB-9B58-4E72-9EAC-7E5FA90BA49B	TCGA-99-AA5R	22	31			0		Lung Adenocarcinoma	47		YES		IHC	YES	89F8AFAD-BBF5-4FD3-B6A1-79A334463C75	Scheduled Follow-up Submission		No	YES		YES	YES	G12C		NO	12	12	NO	46	No	M0	N0	T1a	AA5R					NO
TCGA-50-6590-01A					72		144.70.0	Nationwide Children's Hospital	TCGA-50-6590-F43827	47ED4445-67EF-44BD-AC55-2C3E733F62CF	TCGA-50-6590	22	4			0		Lung Adenocarcinoma			YES				92BFD07E-C98A-4B45-8ED6-A57C54B320D0	Scheduled Follow-up Submission	Complete Remission/Response	No	YES						NO	12	6	NO	50	No	M0	N0	T2	6590		TUMOR FREE			YES
TCGA-64-5781-01A	YES	NO	NO	YES	55		84.73.0	Nationwide Children's Hospital	TCGA-64-5781-F11404	2d57acf6-f8b7-4de5-bc21-d804fc3b145d	TCGA-64-5781	22	3		112	0	96	Lung Adenocarcinoma	73	0					6ABCCCDF-7CF2-4523-B397-A8B471990614		Complete Remission/Response	No	YES					Central Lung		12	5	YES	25	No	M0	N0	T2	5781	Post-Adjuvant Therapy	TUMOR FREE			NO
TCGA-64-1681-01A	YES	YES	NO		61		183.66.0	Nationwide Children's Hospital	TCGA-64-1681-F20365	2dd45a93-1ce5-4d03-902f-6cec7a998472	TCGA-64-1681	22	21			0	439	Lung Adenocarcinoma			YES	Exon 19 Deletion			6E50D1B4-2B84-4FF2-B423-660F325FF2EC	Additional New Tumor Event		No	YES		YES	NO				12	12	YES		No	M0	N0	T1	1681					NO
TCGA-86-7714-01A					61		196.64.0	Nationwide Children's Hospital	TCGA-86-7714-F53595	8A9C1B25-5034-43BB-BB4A-187D9735D9FB	TCGA-86-7714	22	12			0		Lung Adenocarcinoma			NO				534AC643-9170-4FA1-8949-97568E4D5B86	Scheduled Follow-up Submission	Progressive Disease	No	YES	0	NO			Peripheral Lung	NO	12	12	NO	43	No	M0	N2	T1b	7714	Post-Adjuvant Therapy	WITH TUMOR			NO
TCGA-95-A4VP-01A	NO	YES		NO	66		278.56.0	Nationwide Children's Hospital	TCGA-95-A4VP-F58502	29D06D6D-2BAB-4F87-85B2-F4B369A1C6C4	TCGA-95-A4VP	22	11			0	216	Lung Adenocarcinoma		1	NO			NO	A4596E25-CD51-46B3-A7ED-376B65C0892B	Scheduled Follow-up Submission	Stable Disease	No	YES		NO				NO	12	4	YES	20	No	M0	N2	T2b	A4VP	Post-Adjuvant Therapy	WITH TUMOR			YES
TCGA-44-3919-01A					71		52.74.0	Nationwide Children's Hospital	TCGA-44-3919-F5232	5d1a6aba-a69b-4767-b109-8ae19be0770f	TCGA-44-3919	22	8			0		Lung Adenocarcinoma	103						8C4829E9-A994-49C5-9EAD-C71D850A08F8		Complete Remission/Response	No	YES		NO					12	10	NO		No	M0	N0	T1	3919		TUMOR FREE			NO
TCGA-78-7145-01A	YES	YES	NO	NO	52		166.67.0	Nationwide Children's Hospital	TCGA-78-7145-F16671	faa937a2-b75e-4764-89e0-8a9d3698ecda	TCGA-78-7145	22	23			0	422	Lung Adenocarcinoma			NO			NO	F4C3C9A0-7B71-4197-B39D-ADA1DC3C239F	Scheduled Follow-up Submission	Progressive Disease	No	YES		NO			Peripheral Lung		12	9	YES	25	No	M1	N1	T4	7145		WITH TUMOR			YES
TCGA-62-A46S-01A					73		258.59.0	Nationwide Children's Hospital			TCGA-62-A46S	22				0		Lung Adenocarcinoma			NO			NO	07907015-16F2-4DE0-8550-AC7EA7DD8CAD			No	YES		NO			Peripheral Lung		12			40	No	M0	N0	T2	A46S
TCGA-78-7155-01A	YES	YES	NO	NO	68		166.67.0	Nationwide Children's Hospital	TCGA-78-7155-F16958	8ede53b4-10e1-4371-b89d-c4f2423cda1b	TCGA-78-7155	22	28			0	209	Lung Adenocarcinoma			NO			NO	7AAA7995-191C-4CDA-AFB8-F0DFB722BE6D	Scheduled Follow-up Submission	Progressive Disease	No	YES		NO			Peripheral Lung		12	9	YES	48	No	M0	N0	T2	7155
TCGA-69-A59K-01A					60		278.56.0	Nationwide Children's Hospital	TCGA-69-A59K-F56712	5E0B884C-C335-4788-8FFF-1F4CF6565627	TCGA-69-A59K	22	19			0		Lung Adenocarcinoma	75		YES			NO	BCA54DF3-4BEA-4D69-A87A-4A788E996124	Scheduled Follow-up Submission		No	YES						NO	12	2	NO	25	No	M0	N0	T3	A59K		TUMOR FREE		120	YES
TCGA-78-7149-01A					71		166.67.0	Nationwide Children's Hospital	TCGA-78-7149-F17123	95813dc5-e402-4f0b-a425-2578fff0d0c2	TCGA-78-7149	22	3			0		Lung Adenocarcinoma			NO			NO	6D25B180-2CD0-4E7F-BEAA-2BB296DAB866	Scheduled Follow-up Submission		No	YES		NO			Central Lung		12	10		115	No	M0	N0	T4	7149					NO
TCGA-55-6985-01A					58		160.69.0	Nationwide Children's Hospital	TCGA-55-6985-F37056	F432F92C-4BB0-437C-A742-B9E6B4BD8E55	TCGA-55-6985	22	22			0		Lung Adenocarcinoma			NO			NO	B2142758-692D-4D06-BEC4-4EAEF664F212	Scheduled Follow-up Submission		No	YES		NO				YES	12	2	NO	50	No	MX	N0	T2	6985		TUMOR FREE			NO
TCGA-44-A479-01A					73		258.59.0	Nationwide Children's Hospital	TCGA-44-A479-F41312	7FF14E7B-72D0-4EEB-9483-855DE51FB0D5	TCGA-44-A479	22	14			0		Lung Adenocarcinoma	60		YES			NO	78AC00E0-3092-4999-BFB5-B064545CB355	Scheduled Follow-up Submission	Complete Remission/Response	No	YES		NO				NO	12	3	NO	40	No	MX	N0	T2	A479		TUMOR FREE			NO
TCGA-67-3770-01A					70		37.77.0	Nationwide Children's Hospital			TCGA-67-3770	22				0		Lung Adenocarcinoma			NO			NO	1D0AD5FA-8BE2-409E-A102-CE8483F4CBBD			No	YES		NO			Central Lung		12				No	M0	N0	T1	3770
TCGA-44-6147-01A				NO	67		119.76.0	Nationwide Children's Hospital	TCGA-44-6147-F20460	7717ec1a-6c2f-486f-a3f4-3a5d0ddb4e2d	TCGA-44-6147	22	13			0		Lung Adenocarcinoma	68	2					9844E3DA-7E02-4756-8835-3FD69AA0A5C6	Scheduled Follow-up Submission	Complete Remission/Response	No	YES							12	1	NO		Yes	M0	NX	T1b	6147	Other	TUMOR FREE			NO
TCGA-44-6147-01B				NO	67		119.76.0	Nationwide Children's Hospital	TCGA-44-6147-F20460	7717ec1a-6c2f-486f-a3f4-3a5d0ddb4e2d	TCGA-44-6147	22	13			0		Lung Adenocarcinoma	68	2					9844E3DA-7E02-4756-8835-3FD69AA0A5C6	Scheduled Follow-up Submission	Complete Remission/Response	No	YES							12	1	NO		Yes	M0	NX	T1b	6147	Other	TUMOR FREE			NO
TCGA-62-8397-01A					70		232.55.0	Nationwide Children's Hospital	TCGA-62-8397-F42100	FF6E4644-94D8-4449-857F-11AF95093868	TCGA-62-8397	22	15			0		Lung Adenocarcinoma		0	NO			NO	11992901-8558-43BB-9E09-B6F9854998BB	Scheduled Follow-up Submission	Complete Remission/Response	No	YES	90	NO			Peripheral Lung	NO	12	5	NO		No	M0	N0	T3	8397	Preoperative	TUMOR FREE			NO
TCGA-55-A492-01A					70		258.59.0	Nationwide Children's Hospital	TCGA-55-A492-F60135	98B54E54-A0F9-4C7A-A526-F632A36A972D	TCGA-55-A492	22	29			0		Lung Adenocarcinoma	52	2	NO			NO	57E4D066-B241-41D8-8F09-8BF5732206C9	Scheduled Follow-up Submission	Complete Remission/Response	No	YES	80	NO				NO	12	5	NO	35	Yes, History of Prior Malignancy	MX	N0	T1a	A492	Other	TUMOR FREE		92	NO
TCGA-44-7662-01A					61		183.66.0	Nationwide Children's Hospital	TCGA-44-7662-F34016	58426E9F-D0BD-4163-9767-80A6768F6B3F	TCGA-44-7662	22	25			0		Lung Adenocarcinoma	57						3FC5D614-064E-4BFF-B0CE-2FB9637272B3	Scheduled Follow-up Submission	Complete Remission/Response	No	YES		NO				NO	12	7	NO	50	No	MX	N0	T2a	7662		TUMOR FREE	66	68	NO
TCGA-05-4426-01A					71		58.77.0	Nationwide Children's Hospital	TCGA-05-4426-F36562	76BC7F31-DA6E-448B-8B2D-68A57B4B9805	TCGA-05-4426	22	2			0	457	Lung Adenocarcinoma							A26E617F-513D-4272-A6E3-FCC6C17ED1C6	Scheduled Follow-up Submission	Complete Remission/Response	No	YES						NO	12	11	YES	20	No	M0	N0	T2	4426		TUMOR FREE
TCGA-O1-A52J-01A					74		278.56.0	Nationwide Children's Hospital			TCGA-O1-A52J	22				0		Lung Adenocarcinoma			NO			NO	F9374A38-D2E6-4882-BD09-8666B69754BA			No	YES		NO					12			45	No	MX	N0	T1	A52J
TCGA-50-5930-01A	NO	YES		NO	47		119.76.0	Nationwide Children's Hospital	TCGA-50-5930-F32064	51c0573d-cbd9-4d7a-a72a-1e71ab3ae05a	TCGA-50-5930	22	16			0	177	Lung Adenocarcinoma							EDEDBF13-5368-459C-B113-8786BA1023AE	Scheduled Follow-up Submission	Progressive Disease	No	YES						NO	12	5	YES		No	M0	N2	T2	5930		WITH TUMOR			YES
TCGA-05-4250-01A					79		52.74.0	Nationwide Children's Hospital			TCGA-05-4250	22				0		Lung Adenocarcinoma							49E71581-B781-414C-BE4D-08E486148181			No	YES							12			47	No	M0	N1	T3	4250
TCGA-55-8510-01A					55		238.60.0	Nationwide Children's Hospital	TCGA-55-8510-F57923	DA25CA2A-4E7D-4A2E-83C3-00BD003968B2	TCGA-55-8510	22	28			0		Lung Adenocarcinoma	54						2305784E-9E5F-4177-AC88-FAB07AF07F5C	Scheduled Follow-up Submission	Complete Remission/Response	No	YES						NO	12	3	NO		No	MX	N0	T2a	8510		TUMOR FREE	90	70	NO
TCGA-49-AARE-01A					51		423.36.0	Nationwide Children's Hospital			TCGA-49-AARE	22				0		Lung Adenocarcinoma	107.2						AC12B812-C998-41BE-82BA-B2CE0C7D22D1			No	YES							12			15	No	MX	N0	T1	AARE			55.2	41.7
TCGA-97-7554-01A					83		166.67.0	Nationwide Children's Hospital	TCGA-97-7554-F20552	C53D0705-AD5B-47B9-8D49-C786D4466CC7	TCGA-97-7554	22	17			0		Lung Adenocarcinoma	53	1					872FBE4E-7500-4D2C-8521-CF8E32600FCF	Scheduled Follow-up Submission		No	YES		YES	YES	G12V			12	1	NO	30	No	M0	N2	T2a	7554	Post-Adjuvant Therapy	TUMOR FREE	75	75	YES
TCGA-67-3773-01A					84		37.77.0	Nationwide Children's Hospital			TCGA-67-3773	22				0		Lung Adenocarcinoma			NO			NO	CE2473A8-3225-4B72-ACF8-E60CE21DB43C			No	YES		NO			Central Lung		12				No	M0	N0	T2	3773
TCGA-93-8067-01A					77		222.60.0	Nationwide Children's Hospital	TCGA-93-8067-F32193	88DF8B42-F107-47B4-84A7-2E62FE30E870	TCGA-93-8067	22	18			0		Lung Adenocarcinoma	47	2	NO			NO	5B68F125-81AE-49F4-A65D-48207A659BDB	Scheduled Follow-up Submission	Complete Remission/Response	No	YES	80	NO			Peripheral Lung	NO	12	5	NO	20	Yes, History of Prior Malignancy	MX	N0	T2a	8067	Preoperative	TUMOR FREE	94	103	NO
TCGA-44-2661-01A					69		52.74.0	Nationwide Children's Hospital	TCGA-44-2661-F5051	7ac97c53-3160-4567-ba1e-bac4b06376cd	TCGA-44-2661	22	8			0		Lung Adenocarcinoma		1					5098DD80-F752-46BA-9CE8-45250214416F		Complete Remission/Response	No	YES		NO					12	10	NO		Yes	M0	N0	T1	2661	Pre-Adjuvant Therapy	TUMOR FREE			NO
TCGA-86-6851-01A					73		160.69.0	Nationwide Children's Hospital	TCGA-86-6851-F53594	40FE93C5-B9C4-47D2-B194-C15151EBC3CF	TCGA-86-6851	22	12			0		Lung Adenocarcinoma		0					26D6AE7D-5EA9-461E-8EC5-376BC743E6DF	Scheduled Follow-up Submission	Complete Remission/Response	No	YES	100					YES	12	12	NO	52	No	M0	N1	T1b	6851	Post-Adjuvant Therapy	TUMOR FREE			NO
TCGA-MP-A4TH-01A					70		278.56.0	Nationwide Children's Hospital	TCGA-MP-A4TH-F54545	9659993E-D9ED-42F9-8410-F35E8CF2D676	TCGA-MP-A4TH	22	19			0		Lung Adenocarcinoma	73		NO			NO	2B7EB8D3-BB8D-4115-A548-877BEED044FF	Scheduled Follow-up Submission	Complete Remission/Response	No	YES		NO			Peripheral Lung	NO	12	12	NO	20	No	M0	N0	T1a	A4TH		TUMOR FREE	117	115	NO
TCGA-62-A471-01A					64		258.59.0	Nationwide Children's Hospital	TCGA-62-A471-F51439	9BA3092F-235D-4C9D-943F-BD40B1D24721	TCGA-62-A471	22	19			0		Lung Adenocarcinoma		0	NO			NO	560580D4-0358-4257-A90D-8D6B4AA3382E	Scheduled Follow-up Submission	Complete Remission/Response	No	YES	100	NO			Peripheral Lung	NO	12	11	NO	30	No	M0	N1	T2b	A471	Preoperative	TUMOR FREE			YES
TCGA-05-4384-01A		YES			66		119.76.0	Nationwide Children's Hospital	TCGA-05-4384-F36330	F4555A19-ABBE-4673-9871-083B5C01710A	TCGA-05-4384	22	29			0	183	Lung Adenocarcinoma							65BDA65F-0E31-43C8-8663-07FC1CD52174	Scheduled Follow-up Submission	Progressive Disease	No	YES						NO	12	10	YES	20	Yes	M0	N2	T2	4384		WITH TUMOR			YES
TCGA-78-7154-01A					72		166.67.0	Nationwide Children's Hospital	TCGA-78-7154-F16951	9a2d2bfa-8f97-4a0f-9f2c-95bdea60e9c7	TCGA-78-7154	22	28			0		Lung Adenocarcinoma			NO			NO	D4E15FB7-9408-4D83-8A56-6C0FAF8EE15C	Scheduled Follow-up Submission		No	YES		NO			Peripheral Lung		12	9		112.5	No	M0	N2	T3	7154
TCGA-05-4427-01A					65		144.70.0	Nationwide Children's Hospital	TCGA-05-4427-F36564	C0280C41-DC59-4741-8314-055BD0B90DC2	TCGA-05-4427	22	2			0		Lung Adenocarcinoma							A7E7E4BC-A287-4C6A-88C2-B5110DF88C88	Scheduled Follow-up Submission	Complete Remission/Response	No	YES						NO	12	11	NO	8	Yes	M0	N1	T2	4427		TUMOR FREE			YES
TCGA-73-4662-01A	YES	YES	YES	NO	65		58.77.0	Nationwide Children's Hospital	TCGA-73-4662-F8554	7772d756-649c-41b9-85f1-b38aa3c4cdea	TCGA-73-4662	22	6	36		0	21	Lung Adenocarcinoma	116	0	NO			NO	1C92C16E-C1F5-4239-92D7-B2C4BB44CE9A		Complete Remission/Response	No	YES	100	NO			Peripheral Lung		12	1	YES	10	No	M0	N0	T1	4662	Adjuvant therapy	TUMOR FREE			NO
TCGA-91-8496-01A					63		238.60.0	Nationwide Children's Hospital	TCGA-91-8496-F45467	7004F428-D84D-4816-B359-2D998F95C44B	TCGA-91-8496	22	15			0		Lung Adenocarcinoma			NO			NO	5DFDEBC9-E061-4615-8466-22BBB2FA7174	Scheduled Follow-up Submission	Complete Remission/Response	No	YES		NO				NO	12	7	NO		No	MX	NX	T2a	8496		TUMOR FREE			NO
TCGA-97-7547-01A	YES	NO	YES	NO	67		166.67.0	Nationwide Children's Hospital	TCGA-97-7547-F19227	7559a14a-9161-4170-8e6c-cd8040be78ad	TCGA-97-7547	22	6	776		0	775	Lung Adenocarcinoma	94						44D59861-7042-40FE-863A-0C94F45C8DCE	Additional New Tumor Event	Progressive Disease	No	YES							12	12	YES	30	No	MX	N0	T2	7547		WITH TUMOR	83	101	YES
TCGA-4B-A93V-01A	NO	YES	NO	NO	52		406.37.0	Nationwide Children's Hospital	TCGA-4B-A93V-F67799	A3A0DE3B-6050-4CEB-9F60-77C7AC386672	TCGA-4B-A93V	22	11			0	251	Lung Adenocarcinoma		2					A0E31347-E202-48A4-A31A-499A8DA740D7	Scheduled Follow-up Submission	Progressive Disease	No	YES	60				Peripheral Lung	NO	12	11	YES	30	No	M0	N0	T1b	A93V	Pre-Adjuvant Therapy	WITH TUMOR			NO
TCGA-44-A47B-01A					79		258.59.0	Nationwide Children's Hospital	TCGA-44-A47B-F41746	F1FE3CC6-00FC-40B7-AD09-0F7D71224725	TCGA-44-A47B	22	27			0		Lung Adenocarcinoma	73		NO			NO	44F7F767-96C8-4A12-BB85-B81FBA35E51F	Scheduled Follow-up Submission	Complete Remission/Response	No	YES		NO				NO	12	3	NO	4.5	No	M0	N0	T2a	A47B		TUMOR FREE	102	96	NO
TCGA-91-6849-01A					75		160.69.0	Nationwide Children's Hospital	TCGA-91-6849-F32642	7A852ADD-9BFF-47D8-8ACB-A7FAAB892A7C	TCGA-91-6849	22	5			0		Lung Adenocarcinoma	66		YES				211F9E0B-90BC-4C06-B723-1A4D01BFF7E3	Scheduled Follow-up Submission		No	YES		NO				YES	12	6		30	No	MX	N2	T2	6849			75	86
[truncated: 75 more columns]
